# Supplementary material
Source: PubMed Central journal article supplement (PMC4825725)
Supplement: ja5b08980_si_001.pdf [file ja5b08980_si_001.pdf]

Supporting Information for the manuscript:

## **An engineered aminoacyl-tRNA synthetase for cell-selective analysis of mammalian protein synthesis**

Alborz Mahdavi<sup>‡\*</sup>, Graham D. Hamblin<sup>‡</sup>, Granton A. Jindal<sup>‡^</sup>, John D. Bagert<sup>‡\*\*^</sup>, Cathy Dong<sup>\*</sup>, Michael J. Sweredoski<sup>¶</sup>, Sonja Hess<sup>¶</sup>, Erin M. Schuman<sup>†</sup> and David A. Tirrell<sup>‡</sup>

<sup>‡</sup>Division of Chemistry and Chemical Engineering, <sup>\*</sup>Division of Biology and Biological Engineering, <sup>¶</sup>Proteome Exploration Laboratory, Beckman Institute, California Institute of Technology, 1200 E. California Blvd., Pasadena, CA, 91125. <sup>†</sup>Max Planck Institute for Brain Research, Frankfurt am Main, 60438, Germany

## Materials and Methods:

**Development of Mammalian Vectors for Expression of *E. coli* NLL-MetRS/tRNA<sup>Met</sup>.** For PCR and cloning purposes, unless otherwise stated, we used chemically competent *E. coli* MegaX DH10B (Zymo Research). Plasmid DNA was purified using a Miniprep kit (Qiagen); colony selection was performed on LB-agar plates with 100 µg/mL ampicillin. All plasmids were verified by sequencing (Laragen). The *E. coli* NLL-MetRS was obtained from pAM1 (Addgene plasmid 51401) through PCR amplification using a Nhe1 forward primer and an Xho1 reverse primer and inserted into the multiple cloning site of the mammalian expression vector pCDNA3.1+ (Invitrogen). This vector contains a CMV promoter, a bovine growth hormone (BGH) transcriptional stop sequence, and a neomycin resistance gene for G418 selection. The resulting plasmid was designated pMetRSNLL\_G. For simultaneous expression of *E. coli* tRNA<sup>Met</sup> and NLL-MetRS, the *E. coli* elongator tRNA<sup>Met</sup> sequence was synthesized (Integrated DNA Technologies) with the 5' and 3' flanking sequences of human tRNA<sup>fMet</sup> as well as flanking BglII restriction sites. This construct was inserted into the BglII site in pMetRSNLL\_G to produce pMetRSNLLtRNA\_G (sequence included in Figure S8). pMetRSNLLtRNA\_G is a pCDNA3.1+-based vector expressing the NLL-MetRS under CMV promoter control as well as the *E. coli* tRNA<sup>Met</sup>. A second tRNA sequence lacking the C-terminal CCA tail was synthesized (Integrated DNA Technologies) and inserted into the BglII restriction site of MetRSNLL\_G to make pMetRSNLLtRNAdcca\_G (sequence included in Figure S9).

## Introduction of Mutations into MaRS and Development of Associated Mammalian Expression Vectors.

MaRS was obtained from a cDNA clone from American Type Culture Collection clone ID 6414029 (ATCC). Site-directed mutagenesis (Agilent) was used to introduce the NLL, CLL, PLL and SLL mutations at residues L274, Y527 and H562 respectively. The L274G mutation was also introduced. These sequences were PCR amplified with a Nhe1 forward primer and an Xho1 reverse primer and inserted into pCDNA3.1+ (Invitrogen), resulting in plasmids pMaRSWT\_G, pMaRSL274G\_G/pMaRS\_G, pMaRSSLL\_G, pMaRSPLL\_G, pMaRSCLL\_G, pMaRSNLL\_G (sequences in Figures S1-S6, respectively).

**Development of Expression Vectors for Cell-Selective Proteomic Labeling and Cre-Lox Mediated Expression of L274G/MmMetRS.** To prepare pMaRSC, the L274G MaRS coding sequence was connected to a mCherry sequence through a T2A linker by sewing PCR. Briefly, the MaRS sequence (obtained from pMaRSL274G\_G/pMaRS) was PCR amplified using a Nhe1 forward primer containing a Flag-Tag sequence and a reverse primer containing a T2A linker. The mCherry coding sequence was amplified using a matching T2A sequence in the forward primer and a reverse primer encoding a C-terminal Myc-

tag and stop codon. Sewing PCR was used to amplify the final product with the following sequence components: Nhe1-FlagTag-MaRS-T2A-mCherry-MycTag-Xho1. This sequence was inserted between the Nhe1 and Xho1 sites of a pCDNA3.1+ vector containing a hygromycin resistance cassette (Invitrogen) to yield pMaRSC (sequence in Figure S12). For Cre-Lox mediated recombination, a LoxP-flanked transcriptional stop sequence was inserted after the CMV promoter in the pMaRSC plasmid. The LoxP-flanked transcriptional stop sequence consisting of forward LoxP (ATAACTTCGTATAGCATACATTATACGAAGTTAT) sequences flanking the transcriptional stop sequence was synthesized with Nhe1 restriction sites on both ends (Integrated DNA Technologies). The resulting fragment was ligated into the Nhe1 site of pMaRSC to yield the Cre-Lox plasmid pMaRSC\_lox\_H (sequence in Figure S13). The correct orientation of the insert into the Nhe1 cut site was verified by sequencing.

**Cell Culture.** Cells were passaged every three days on tissue-culture plates and incubated at 37°C and 5% CO<sub>2</sub>. CHO-K1 cells were maintained in RPMI (Invitrogen) medium with 10% fetal bovine serum, and supplemented with Pen/Strep, L-glutamine and non-essential amino acids (Invitrogen). HeLa and COS7 cells were cultured in DMEM (Invitrogen) medium with 10% fetal bovine serum, and supplemented with Pen/Strep, L-glutamine and non-essential amino acids (Invitrogen).

**Cell Transfection, Selection and Conditional Transgene Activation.** Mammalian expression plasmids were amplified in *E. coli* strain MegaX DH10B and purified by using endotoxin-free plasmid Maxi-kits (Qiagen). Lipofectamine 2000 (Invitrogen) was used for all transfections according to the manufacturer's recommended procedures. For identification of MetRS variants that charge AnI and to study AnI incorporation, all cells were transiently transfected 30 hours prior to AnI labeling. For the Cre-Lox transgene activation study, pMaRSC\_lox\_H was linearized with BglII and transfected into CHO cells. After selection on hygromycin at 100 µg/ml for 10 days, surviving colonies were picked and expanded to yield a stable cell line. Cre-mediated recombination in these cells was achieved through transient transfection with a plasmid expressing eGFP-Cre under control of an EF1α promoter (Addgene plasmid 11923).

**Synthesis of Azidonorleucine.** Azidonorleucine synthesis was based on a previous protocol for azidohomoalanine synthesis, using Boc-lysine as the starting material.<sup>1</sup>

**Copper-Catalyzed Reaction of Alkyne-TAMRA with AnI-labeled Proteins in Cell Lysates and Detection by In-gel Fluorescence.** Cells were lysed with 4% SDS in phosphate-buffered saline (PBS).

Ethylenediaminetetraacetic acid (EDTA)-free protease inhibitor (Roche) was added to the lysates to reduce protease activity. PBS was added to dilute the SDS concentration to 1%, and cell lysates were centrifuged at 14,000 rcf for 10 minutes to remove cellular debris. Protein concentrations were measured by using a bicinchoninic protein quantification kit (BCA assay; Pierce). The same amount of protein was used for each condition; concentrations ranged from 0.1 to 0.4 mg/mL. Copper-catalyzed reactions were performed using the Click-IT TAMRA protein analysis kit (Invitrogen). Proteins were precipitated with chloroform/methanol, washed with methanol to remove unreacted dye and resuspended in protein loading buffer containing 2% SDS and 10 mM 2-mercaptoethanol. Proteins were separated by electrophoresis on 12% Bis-Tris polyacrylamide gels (Invitrogen). TAMRA ( $\lambda_{\text{excitation}} = 555 \text{ nm}$  and  $\lambda_{\text{emission}} = 580 \text{ nm}$ ) was excited at 532 nm and detected with a 580 band-pass 30 nm filter. In-gel fluorescence images were acquired on a Typhoon 9400 molecular imager (GE Healthcare).

**Detection of Proteins in Gels and Western Blots.** Bicinchoninic acid protein quantification (Pierce) was used to equalize the amounts of proteins analyzed under different conditions. After dye labeling via the copper-catalyzed click reaction described above, proteins were washed with methanol to remove unreacted dye and then separated on Novex 12% Bis-Tris polyacrylamide gels (Invitrogen). Colloidal blue dye (Invitrogen) was used for nonspecific protein detection. For Western blots the proteins were transferred to nitrocellulose membranes (GE Healthcare), and probed with a Myc-tag-Alexa Fluor 488 conjugate monoclonal antibody (Cell Signal Technologies) at 1:1000 dilution in PBS with 0.2% v/w Tween20 (Sigma). Imaging of Western blots and gels was performed with a Typhoon 9400 molecular imager (GE Healthcare).

**Copper-Catalyzed Reaction of Alkyne-TAMRA in Adherent Cells and Fluorescence Confocal Microscopy.** Copper-catalyzed azide-alkyne cycloaddition reactions and synthesis of requisite THPTA ligand were performed as described previously<sup>1,2</sup>. Adherent CHO cells seeded onto glass bottom tissue culture plates (MatTek) were incubated in fresh CHO medium, as described above, supplemented with AnI at 1.5 mM, for 6 hours. Cells were washed twice with PBS, fixed with 3.7% formaldehyde in PBS for 15 minutes at room temperature, permeabilized with 4°C methanol for 10 minutes, and washed three times with PBS at room temperature. Labeling with alkyne-TAMRA (Invitrogen) was performed at room temperature in pH 7.4 PBS for 2 hours, using a final concentration of 0.1 mM copper sulfate, 0.5 mM THPTA, 5 mM sodium ascorbate, 5 mM aminoguanidine and 10  $\mu\text{M}$  alkyne-TAMRA. To remove unreacted dye and other reaction components, cells were washed five times at 30-min intervals with PBS. Cell nuclei were stained with 300 nM DAPI in PBS for 30 min at room temperature and washed

three times with PBS before imaging. Fluorescence confocal images were obtained on a Zeiss LSM 510 microscope.

### Identification of Anl Incorporation Sites in Cellular Proteins.

HeLa cells expressing L274G*Mm*MetRS were labeled for a total of 10 hours with 2mM Anl before proteomic analysis. Cells were lysed with 1% SDS in PBS supplemented with EDTA-free protease inhibitor (Roche). Lysates was sonicated using a tip sonicator to reduce viscosity and centrifuged at 14,000 rcf for 15 min to remove cellular debris and reacted with an acid-cleavable biotin-alkyne enrichment tag for 2 hours, using a final concentration of 0.1 mM copper sulfate, 0.5 mM THPTA ligand, 5 mM sodium ascorbate, 5 mM aminoguanidine, and 100  $\mu$ M alkyne probe. To identify sites of Anl incorporation in proteins, we used a cleavable enrichment tag that would allow detection of Anl and tagged-Anl residues at Met positions. This acid-cleavable biotin-alkyne enrichment tag was previously reported by us<sup>3</sup> and has the following structure:

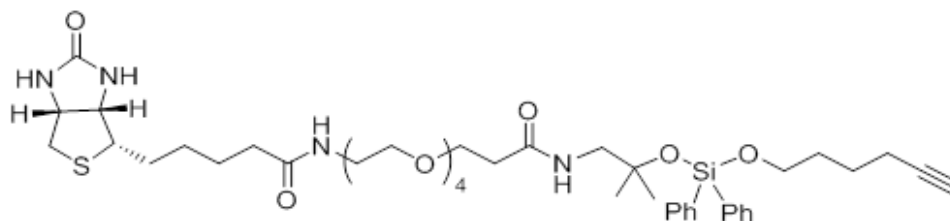

After click reaction with this tag, proteins were precipitated with acetone, dissolved in 250  $\mu$ l of 4% SDS in PBS, and diluted to 0.1% SDS by addition of PBS supplemented with EDTA-free protease inhibitor (Roche). Proteins were incubated with 400  $\mu$ l Streptavidin Plus Ultralink resin (Pierce) for 1.5 hours at room temperature. Affinity purification was performed according to a previously published protocol<sup>4</sup> and the tag was cleaved in mild acidic solution, the resulting cleaved tag structure after reaction with Anl residue is as follows:

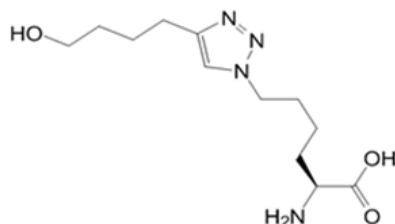

This tag structure introduces a mass shift of 121.12 amu at each methionine position, this variable mass modification includes the mass shift from methionine to Anl and the triazole conjugate containing the

cleaved tag moiety. We used this mass shift in our mass spectrometric analysis as a variable mass modification to search for AnI incorporation at Met positions in proteins.

**Tryptic Digest for Identification of AnI Incorporation Sites.** After enrichment as described above, elution fractions were combined with Amicon Ultra 0.5 centrifuge filters (3 kDa MWCO) (Millipore), and resuspended in 200  $\mu$ L Tris-HCl pH 8.5. Lysyl endopeptidase (Wako; 10  $\mu$ L of 0.1  $\mu$ g/ $\mu$ L solution in 100 mM Tris-HCl pH 8.5) was added, and the sample was incubated for 4 hours at room temperature in the dark. Thereafter 20  $\mu$ L of 0.5  $\mu$ g/ $\mu$ L trypsin (Wako) in water was added and the sample was incubated in the dark overnight at room temperature. The eluent was centrifuged at 14000 rcf for 20 min using a 10 kDa molecular weight cutoff spin filter (Pierce) to remove undigested proteins as well as trypsin which remains in the filter. The flow-through, which contained tryptic peptides, was retained and acidified to 0.2% CF<sub>3</sub>COOH. The peptide solution was desalted as described by Mann and coworkers<sup>5</sup> using a 3 mL MILI-SPE C18-SD extraction disk cartridge (3M) as follows. The cartridge was washed with 1 mL CH<sub>3</sub>OH and centrifuged at 1500 rcf for 1 min, washed with 0.5 mL 0.1% CF<sub>3</sub>COOH, 70% CH<sub>3</sub>CN in water, and centrifuged at 1500 rcf for 1 min. The cartridge was washed with 0.1% CF<sub>3</sub>COOH in water and centrifuged at 1500 rcf for 1 min. The peptide sample was loaded into the cartridge and passed through three times; each time the cartridge was centrifuged at 150 rcf for 3 min. The cartridge was washed twice with 0.5 mL 0.1% CF<sub>3</sub>COOH in water and centrifuged at 150 rcf for 3 min. To elute the desalted peptides, the cartridge was washed with 0.5 mL of CH<sub>3</sub>CN in water and centrifuged at 150 rcf for 3 min. The desalted peptides were lyophilized and stored at 4°C before analysis by mass spectrometry.

**Affinity Enrichment of AnI-labeled Proteins for Shotgun Proteomics.** Cells were labeled for a total of 24 hours with 2 mM AnI, then washed with PBS and lysed with 1% SDS in PBS supplemented with EDTA-free protease inhibitor (Roche) and 100 mM chloroacetamide. Lysates were boiled for 10 minutes at 95°C, and centrifuged at 14,000 rcf for 30 minutes to remove cellular debris. The supernatant protein content was quantified using the bicinchoninic acid assay. For each enrichment, 3 mg of lysate was combined with 50  $\mu$ L of azadibenzocyclooctyne resin (50% slurry by volume; Click Chemistry Tools) that had been washed three times with 0.8% SDS in PBS. This copper-free on-resin cycloaddition reaction was incubated at room temperature on a rotating table for 3 hours, and then unreacted DBCO groups were quenched by addition of 20  $\mu$ L 100 mM AnI for 30 minutes. The supernatant was then removed, and the beads washed with 1 mL H<sub>2</sub>O, reduced with 0.5 mL DTT (1 mM, 15 minutes at 70°C), and alkylated with 0.5 mL iodoacetamide (40 mM, 30 minutes at room temperature, protected from light). The resin was

then washed extensively to remove non-specifically bound proteins, using 40 mL each of 0.8% SDS in PBS, 8 M urea in 100 mM tris (pH 8.0), and 20% acetonitrile (in 5 mL aliquots). After washing, the resin was transferred to an eppendorf with 100  $\mu$ L trypsin digestion buffer (10% acetonitrile in 50 mM ammonium bicarbonate). This was supplemented with 0.1  $\mu$ g of sequencing grade trypsin, and incubated with shaking at 37°C overnight to digest the resin-bound proteins. The supernatant was then collected, combined with two washes of the resin (150  $\mu$ L 10% acetonitrile each), and lyophilized. To investigate the non-specific background of this enrichment, this same protocol was also carried out on cells that had been pulsed with 2 mM methionine instead of AnI.

**Sample Preparation for Shotgun Proteomics.** After affinity enrichment, digested peptides were resuspended in 100  $\mu$ L of 50 mM ammonium bicarbonate, treated with a HiPPR detergent removal spin column (Pierce) to remove trace SDS, and desalted with a C18 ZipTip (EMD Millipore). The eluate was lyophilized, and resuspended in 0.2% formic acid for LC-MS/MS analysis. An aliquot of each sample was diluted in water and quantified using the LavaPep Fluorescent Protein and Peptide Quantification Kit (Gel Company), to estimate the appropriate volume to analyze by mass spectrometric analysis.

**Mass Spectrometry.** Analyses were performed on a hybrid LTQ-Orbitrap Elite (Thermo Fisher Scientific) equipped with a nanoelectrospray ion source connected to an EASY-nLC II instrument (Thermo Fisher Scientific) as described previously<sup>6</sup>. Separation of peptides was performed using a 15-cm reversed phase analytical column (75  $\mu$ m ID) with 3  $\mu$ m C18 beads (ReproSil-Pur C18-AQ) with a gradient of 2% solvent B for 5 minutes followed by an increase from 2% to 30% in 115 min and lastly a sharp rise to 100% B in 1 min. Solvent A was 0.2% formic acid, 2% acetonitrile, 97.8% LC-MS water and solvent B was 0.2% formic acid, 80% acetonitrile, 19.8% LC-MS water. The mass spectrometer was operated in data-dependent mode. Survey full scan mass spectra were acquired with a resolution of 120,000 at 400 m/z. The top 20 most intense ions from the survey scan were isolated and, after the accumulation of 5000 ions, fragmented in the linear ion trap by collision induced dissociation. Precursor ion charge state screening was enabled and singly charged and unassigned charge states were rejected. The dynamic exclusion list was enabled with a relative mass window of 10 ppm. An additional exclusion list included common trypsin peptide masses. Data analysis was performed using MaxQuant software (v. 1.5.3.8).<sup>7</sup> Spectra were extracted from the raw files using MaxQuant with match between runs. Spectra were searched against UniProt Chinese Hamster database (23888 entries) and a contaminant database (246 entries). Digestion enzyme was specified as trypsin with up to two missed cleavages. Variable modifications

included methionine oxidation (+15.9949), N-terminal protein acetylation (+42.0106), Met to Anl (+23.0450), and Met to Anl to Lys modification (-2.9455) and a fixed modification of cysteine carbamidomethylation (+57.0215). The Met to Anl to Lys modification is for residues in which Anl is incorporated at Met codons, wherein the azide side chain of this Anl does not form a triazole linkage during cycloaddition reaction, and it is reduced to a primary amine during proteomics workup and sample preparation. Precursor mass tolerance was less than 4.5 ppm after mass recalibration by MaxQuant. Fragment ion tolerance was 0.5 Da. Protein and peptide false discovery rates were fixed at 1% and estimated using a decoy database search performed by MaxQuant. Annotation of proteins into different cellular components was performed using STRAP software.<sup>8</sup>



**Figure S1. The pMarsWT\_G vector for expression of wild-type *MmMetRS* under CMV promoter control.** Restriction enzymes are highlighted in yellow and the enzyme coding sequence is highlighted in green. Kozak sequence is highlighted in blue. The expressed protein sequence is included after the plasmid sequence.

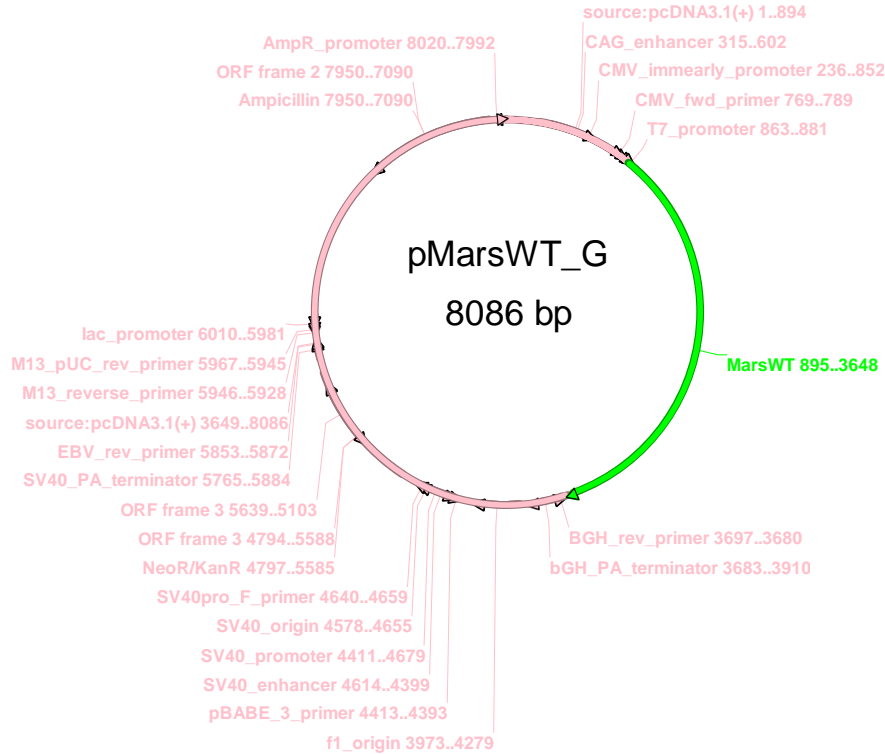

GACGGATCGGGAGATCTCCCATCCCCTATGGTGCCTCTCAGTACAATCTGCTCTGATGCCGCATAGTTAAGCCAG  
TATCTGCTCCCTGCTTGTGTGTTGGAGGTCGCTGAGTAGTGCGCGAGCAAAATTTAAGCTACAACAAGGCAAGGCTT  
GACCGACAATTGCATGAAGAATCTGCTTAGGGTTAGGCGTTTTGCGCTGCTTCGCGATGTACGGGCCAGATATACGC  
GTTGACATTGATTATTGACTAGTTATTAATAGTAATCAATTACGGGGTCATTAGTTTCATAGCCCATATATGGAGTTC  
CGCGTTACATAAATTACGGTAAATGGCCCGCTGGCTGACCGCCCAACGACCCCCGCCATTGACGTCAATAATGAC  
GTATGTTCCCATAGTAACGCCAATAGGGACTTTCCATTGACGTCAATGGGTGGAGTATTTACGGTAAACTGCCCACT  
TGGCAGTACATCAAGTGTATCATATGCCAAGTACGCCCCCTATTGACGTCAATGACGGTAAATGGCCCGCTGGCAT  
TATGCCAGTACATGACCTTATGGGACTTTCTACTTGGCAGTACATCTACGTATTAGTCATCGCTATTACCATGGT  
GATGCGGTTTTGGCAGTACATCAATGGGCGTGGATAGCGGTTTTGACTCACGGGGATTTCCAAGTCTCCACCCATTG  
ACGTCAATGGGAGTTTTGTTTTGGCACCAAAATCAACGGGACTTTCCAAAATGTCGTAACAACCTCCGCCCATGACG  
CAAATGGGCGGTAGGCGTGTACGGTGGGAGGTCTATATAAGCAGAGCTCTCTGGCTAACTAGAGAACCCTGCTTA  
CTGGCTTATCGAAATTAATACGACTCACTATAGGGAGACCCAAGCTG**GCTAGCGCCACC**ATGGCCACCATCACCAT  
CACCAT**ATGAGACTGTTTCGTGAGCGAGGGTTCCCCGGGGAGCCTGCCCGTGGCTGGCTGCGGCCGAGGGCCCCGGG**  
**TCGGGCGGAGCTGCTCATCAGCACCGTAGGCCCGAAGAGTGTGTGGTACCATTCCCTTACCCGGCCTAAGGTCCCTG**  
**TCTTGCAGCTGGATAGTGGAACCTACCTCTTCTCTGCTAGTGCAATCTGCCGATATTTTTTCTGTTATGTGGCTGG**  
**GAACAAGATGATCTCACCAACCAGTGGCTGGAATGGGAGGCAACAGAAGTGCAGCCAGTTCTGTCTGCTGCCCTACA**  
**CTGTCTAGTGGTTCAAGGCAAGAAAGGGGAAGATATACTTGGCCCACTTCGGAGAGTCCTGACTCACATTGATCACA**  
**GCTTGAGTCGTCAAACTGTCCTTTTCTGGCTGGGGACACAGAATCTCTAGCTGACATTGTTTTGTGGGGAGCACTG**  
**TATCCTTTACTGCAAGACCCAGCTTACCTCCCTGAGGAGTTGGGTGCCCTGCAAAGTTGGTTCAGACACTGAGTAC**  
**CCAGGAACCGTGTGAGCGAGCTGCAGAGACGGTGCTAAAACAGCAGGGTGTCTTGGCACTTCGTCTGTACCTCCAGA**  
**AACAGCCACAGCCTCAGCCCCCGCTCTGAGGGGAGAAGTGTGCAACGAGCTGGAGGAAGAGGAAGTGGCTACC**

TTGTCTGAGGAGGACATCGTTACAGCTGTTGCCGCGTGGGAGAAGGGTCTGGAAAGCCTGCCTCCGCTAAAGCTCCA  
GCAGCATCCAGTGTTCCTGTGCCTGGAGAGAGGAATGTTCTCATCACCAGTGCCTCCCCTATGTCAACAATGTCC  
CCCACCTTGGAAACATCATTGGCTGTGTGCTCAGTGTGTCTTTGCAAGGTATTGTGCCTTCGCCAGTGGAA  
ACCCTCTATCTGTGTGGTACAGATGAGTATGGTACTGCGACAGAGACCAAGGCCATGGAGGAGGGCCTAACCCACG  
GGAAATCTGTGACAAGTACCATGCCATCCATGCTGACATCTACCCTGGTTCGGCATATCGTTCGATACTTTCGGGC  
GCACTACCACTCCTCAGCAGACCAAAATCACCCAGGACATCTCCAGAGGTTGCTGACCCGGGGGTTTGTGCTGCGA  
GATACTGTGGAGCAGCTTCGGTGTGAGCGGTGTGCACGTTTCTGGCTGACCGCTTGTGGAGGGTGTGTGTCCCTT  
CTGTGGCTATGAAGAGGCCCGAGGTGACCAGTGTGACAGGTGTGGCAAGCTCATCAATGCCATTGAGCTCAAGAAAC  
CACAGTGCAAAATCTGCCGCTCCTGCCCTGTGGTGGAGTCTCACAGCACCTGTTTCTAGACTTGCCTAAGTTGGAA  
AAGCGTCTGGAGGACTGGTGGGGAAGACAGTGCCTGGCAGTACTGGACACCCAATGCCAGGTTTATTATACGTTT  
CTGGCTTCGAGATGGCCTCAAGCCACGATGCATCACCAGAGACCTCAAATGGGGAACGCCTGTGCCCTTGAAGGTT  
TTGAGGACAAGGTATTTTACGTCTGGTTTGTGCTACTATTGGCTACGTGTCCATCACAGCCAACACTACACAGACCAA  
TGGGAGAAATGGTGAAGAACCAGAACAAGTGGACCTTACCAGTTCATGGCCAAAGACAATGTTCCCTTCCATGG  
CTTGGTCTTTCCGTGTTTCACTCCTAGGAGCTGAGGACAACACTACCCCTGGTCAAGCACATCATTGCTACAGAGTACC  
TGAACTATGAGGATGGGAAATTCTCTAAGAGCCGGGGCATAGGAGTGTGGAGACATGGCCAAGGATACAGGAATC  
CCTGCTGACATCTGGCGATTCTATCTGCTATAACATTCCGGCCTGAGGGCCAGGACAGTGCCTTCTCCTGGACAGACTT  
GTTGATTAAAAACAATTCTGAGCTGCTCAACAACCTGGGCAACTTCATCAACAGAGCTGGCATGTTTGTCTTAAGT  
TTTTTGGCGGTTGTGTGCCTGAGATGGCGCTAACCCCTGATGACAGACGCCTGGTGGCCCATGTCTCTTGGGAACTC  
CAGCACTATCACCAGCTGTTGGAAAAGGTTCCGGATCCGGGATGCCTTGCGCAGTATCCTCACCATATCTCGCCATGG  
CAACCAATACATTCAAGTGAATGAGCCCTGGAAACGGATTAAGGTTGGTGGAGATGGACAGGCAGCGGGCAGGCACAG  
TGACAGGCATGGCAGTGAACATGGCTGCCTTGCTGTCTGTCTGCTGACAGCCATACATGCCACAGTCACTCTACC  
ATCCAGACCCAGCTGCAGCTCCCACCTGCAGCCTGCCGCATCCTTGCCACAAGCTTCATTTGTACCTTGCCAGCAGG  
CCACCGAATTGGCACAGTCACTCCTTTGTTCCAAAACCTGGAAAATGACCAGATTGAAAATTTGAGGCAGCGCTTTG  
GAGGGGGTTCAGGCTAAAGGCTCCCCAAGCCAGCAGCTGTGGAGGCAGTTACAGCAGCAGGCTCGCAGCACATACAA  
ACGCTGACGGATGAGGTGACCAAGCAGGGCAACGTCGTCCGGGAACTGAAAGCACAGAAGGCAGACAAGAACCAGGT  
TGCTGCAGAGGTGGCTAAACTCTTGGATCTAAAGAAACAGTTGGCTTTGGCTGAGGGGAAACCCATTGAAACTCCTA  
AAGGCAAGAAGAAAAAGTGATAACTCGAGTCTAGAGGGCCCGTTTAAACCCGCTGATCAGCCTCGACTGTGCCTTCT  
AGTTGCCAGCCATCTGTTGTTTTGCCCTCCCCCGTGCCTTCCCTTGACCCTGGAAGGTGCCACTCCCCTGTCTTTT  
CTAATAAAATGAGGAAATTCATCGCATTGTCTGAGTAGGTGTCTATTCTATTCTGGGGGTGGGGTGGGGCAGGACA  
GCAAGGGGGAGGATTGGGAAGACAATAGCAGGCATGCTGGGGATGCGGTGGGCTCTATGGCTTCTGAGGCGGAAAGA  
ACCAGCTGGGGCTTAGGGGGTATCCCCACGCGCCCTGTAGCGGCGCATTAAAGCGCGGCGGGTGTGGTGGTTACGCG  
CAGCGTGACCGCTACACTTGCCAGCGCCCTAGCGCCCGCTCCTTTCCGCTTTCTTCCCTTCCCTTCTCGCCACGTTG  
CCGGCTTTCCCCGTCAAGCTCTAAATCGGGGGCTCCCTTTAGGGTCCGATTTAGTGCTTTACGGCACCTCGACCCC  
AAAAAATTGATTAGGGTGTGTTTACGTAAGTGGGCCATCGCCCTGATAGACGGTTTTTTCGCCCTTTGACGTTGGA  
GTCCACGTTCTTTAATAGTGGACTCTTGTTCAAAACCTGGAACAACACTCAACCCTATCTCGGTCTATTCTTTTATT  
TATAAGGGATTTTGGCGATTTCCGCTATTGGTTAAAAAATGAGCTGATTTAACAAAAATTTAACGCGAATTAATTC  
TGTGGAATGTGTGTGAGTTAGGGTGTGGAAAGTCCCCAGGCTCCCCAGCAGGCAGAAGTATGCAAAGCATGCATCTC  
AATTAGTCAGCAACCAGGTGTGGAAAGTCCCCAGGCTCCCCAGCAGGCAGAAGTATGCAAAGCATGCATCTCAATTA  
GTCAGCAACCATAGTCCC GCCCTAACTCCGCCATCCCGCCCTAACTCCGCCAGTTCCGCCATTCTCCGCC  
ATGGCTGACTAATTTTTTTTTATTTATGAGAGCCGAGGCCGCTCTGCCTCTGAGCTATTCCAGAAGTAGTGAGGA  
GGCTTTTTTTGGAGGCCTAGGCTTTTGCAAAAAGCTCCCGGGAGCTTGTATATCCATTTTCGGATCTGATCAAGAGAC  
AGGATGAGGATCGTTTCGCATGATTGAACAAGATGGATTGCACGCAGGTTCTCCGGCCGCTTGGGTGGAGAGGCTAT  
TCGGCTATGACTGGGCACAACAGACAATCGGCTGCTCTGATGCCGCCGTGTTCCGGCTGTGAGCGCAGGGGCGCCCG  
GTTCTTTTTTGTCAAGACCGACCTGTCCGGTGCCTGAATGAACTGCAGGACGAGGCAGCGCGGCTATCGTGGCTGGC  
CACGACGGGCGTTTCTTGCAGCTGTGCTCGACGTTGTCACTGAAGCGGGAAGGGACTGGCTGCTATTGGGCGAAG  
TGCCGGGGCAGGATCTCCTGTCTCTCACCTTGTCTTCCGAGAAAGTATCCATCATGGCTGATGCAATGCGGCGG  
CTGCATACGCTTGTATCCGGCTACCTGCCATTGACCACCAAGCGAAACATCGCATCGAGCGAGCACGTAAGGAT  
GGAAGCCGGTCTTGTGATCAGGATGATCTGGACGAAGAGCATCAGGGGCTCGCGCCAGCCGAACTGTTCCGCCAGGC  
TCAAGGCGCGCATGCCCGACGGCGAGGATCTCGTCTGACCCATGGCGATGCCTGCTTGCCGAATATCATGGTGGAA



**Figure S2. The pMaRSL274G\_G vector for expression of L274G/MmMetRS under CMV promoter control.** Restriction enzymes are highlighted in yellow and the enzyme coding sequence is highlighted in green. Kozak sequence is highlighted in blue. The expressed protein sequence is included after the plasmid sequence. This construct is available through Addgene.

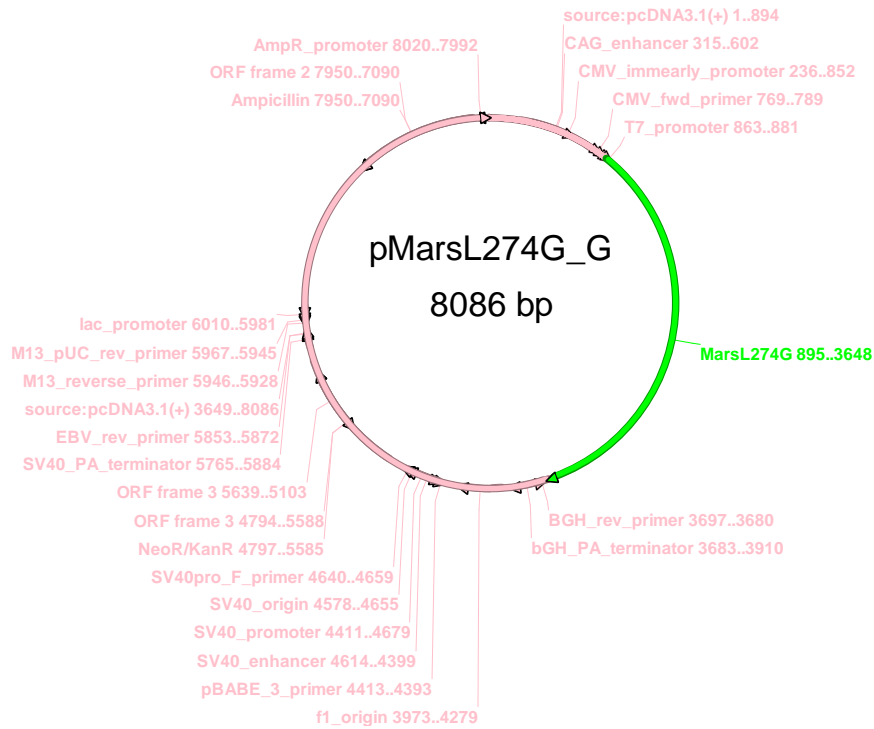

GACGGATCGGGAGATCTCCCATCCCCTATGGTGCACCTCTCAGTACAATCTGCTCTGATGCCGCATAGTTAAGCCAG  
TATCTGCTCCCTGCTTGTGTGTTGGAGGTCGCTGAGTAGTGCGCGAGCAAAATTTAAGCTACAACAAGGCAAGGCTT  
GACCGACAATTGCATGAAGAATCTGCTTAGGGTTAGGCGTTTTTGGCGTCTGCTTCGCGATGTACGGGCCAGATATACGC  
GTTGACATTGATTATTGACTAGTTATTAATAGTAATCAATTACGGGGTCATTAGTTTCATAGCCCATATATGGAGTTC  
CGCGTTACATAAATTACGGTAAATGGCCCGCCTGGCTGACCGCCCAACGACCCCCGCCATTGACGTCAATAATGAC  
GTATGTTCCCATAGTAACGCCAATAGGGACTTTCCATTGACGTCAATGGGTGGAGTATTTACGGTAAACTGCCCACT  
TGGCAGTACATCAAGTGTATCATATGCCAAGTACGCCCCCTATTGACGTCAATGACGGTAAATGGCCCGCCTGGCAT  
TATGCCCAGTACATGACCTTATGGGACTTTCTACTTGGCAGTACATCTACGTATTAGTCATCGCTATTACCATGGT  
GATGCGGTTTTTGGCAGTACATCAATGGGCGTGGATAGCGGTTTTGACTCACGGGGATTTCCAAGTCTCCACCCCATTG  
ACGTCAATGGGAGTTTTGTTTTGGCACAAAATCAACGGGACTTTCCAAAATGTCGTAACAACCTCCGCCCCATTGACG  
CAAATGGGCGGTAGGCGTGTACGGTGGGAGGTCTATATAAGCAGAGCTCTCTGGCTAACTAGAGAACCCACTGCTTA  
CTGGCTTATCGAAATTAATACGACTCACTATAGGGAGACCCAAGCTGGCTAGCGCCACCATGCCCACCATCACCAT  
CACCATATGAGACTGTTTCGTGAGCGAGGGTTCCCCGGGGAGCCTGCCCGTGTGGCTGCGGCCGCGAGGGCCCGGGG  
TCGGGCGGAGCTGCTCATCAGCACCGTAGGCCCGAAGAGTGTGTGGTACCATTCCCTTACCCGGCCCTAAGGTCCCTG  
TCTTGCAGCTGGATAGTGGCAACTACCTCTTCTCTGCTAGTGCAATCTGCCGATATTTTTTCTGTTATGTGGCTGG  
GAACAAGATGATCTCACCAACCAGTGGCTGGAATGGGAGGCAACAGAAGTGCAGCCAGTTCTGTCTGCTGCCCTACA  
CTGTCTAGTGGTTCAAGGCAAGAAAGGGGAAGATATACTTGGCCCACTTCGGAGAGTCTGACTCACATTGATCACA  
GCTTGAGTCGTCAAACTGTCCTTTTCTGGCTGGGGACACAGAATCTCTAGCTGACATTGTTTTGTGGGGAGCACTG  
TATCCTTTACTGCAAGACCCAGCTTACCTCCCTGAGGAGTTGGGTGCCCTGCAAAGTTGGTTCAGACACTGAGTAC  
CCAGGAACCGTGTGAGCGAGCTGCAGAGACGGTGCTAAAACAGCAGGGTGTCTGGCACTTCGTCTGTACCTCCAGA  
AACAGCCACAGCCTCAGCCCCCGCCTCTGAGGGGAGAAGTGTGAGCAACGAGCTGGAGGAAGAGGAAGTGGCTACC

TTGTCTGAGGAGGACATCGTTACAGCTGTTGCCGCGTGGGAGAAGGGTCTGGAAAGCCTGCCTCCGCTAAAGCTCCA  
GCAGCATCCAGTGTTCCTGTGCCTGGAGAGAGGAATGTTCTCATCACCAGTGCCGGACCCTATGTCAACAATGTCC  
CCCACCTTGGAAACATCATTGGCTGTGTGCTCAGTGCTGATGTCTTTGCAAGGTATTGTGCCTTCGCCAGTGGAA  
ACCCTCTATCTGTGTGGTACAGATGAGTATGGTACTGCGACAGAGACCAAGGCCATGGAGGAGGGCCTAACCCACG  
GGAAATCTGTGACAAGTACCATGCCATCCATGCTGACATCTACCCTGGTTTCGGCATATCGTTTCGATACTTTCGGGC  
GCACTACCACTCCTCAGCAGACCAAAATCACCCAGGACATCTTCCAGAGGTTGCTGACCCGGGGGTTTGTGCTGCGA  
GATACTGTGGAGCAGCTTCGGTGTGAGCGGTGTGCACGTTTCTGGCTGACCGCTTGTGGAGGGTGTGTGTCCCTT  
CTGTGGCTATGAAGAGGCCCGAGGTGACCAGTGTGACAGGTGTGGCAAGCTCATCAATGCCATTGAGCTCAAGAAAC  
CACAGTGCAAAATCTGCCGCTCCTGCCCTGTGGTGGAGTCTCACAGCACCTGTTTCTAGACTTGCCTAAGTTGGAA  
AAGCGTCTGGAGGACTGGTTGGGGAAGACAGTGCCTGGCAGTACTGGACACCCAATGCCAGGTTTATTATACGTTT  
CTGGCTTCGAGATGGCCTCAAGCCACGATGCATCACCAGAGACCTCAAATGGGGAACGCCTGTGCCCTTGAAGGTT  
TTGAGGACAAGGTATTTTACGTCTGGTTTGTGCTACTATTGGCTACGTGTCCATCACAGCCAACACACAGACCAA  
TGGGAGAAATGGTGAAGAACCAGAACAAGTGGACCTTACCAGTTCATGGCCAAAGACAATGTTCCCTTCCATGG  
CTTGGTCTTTCCGTGTTTCACTCCTAGGAGCTGAGGACAACACACCCTGGTCAAGCACATCATTGCTACAGAGTACC  
TGAACTATGAGGATGGGAAATTCTCTAAGAGCCGGGGCATAGGAGTGTGGAGACATGGCCAAGGATACAGGAATC  
CCTGCTGACATCTGGCGATTCTATCTGCTATAACATTCGGCCTGAGGGCCAGGACAGTGCCTTCTCCTGGACAGACTT  
GTTGATTA AAAACAATTCTGAGCTGCTCAACAACCTGGGCAACTTCATCAACAGAGCTGGCATGTTTGTCTTAAGT  
TTTTTGGCGGTTGTGTGCCTGAGATGGCGCTAACCCCTGATGACAGACGCCTGGTGGCCCATGTCTCTTGGGAACTC  
CAGCACTATCACCAGCTGTTGGAAAAGGTTCCGGATCCGGGATGCCTTGCGCAGTATCCTCACCATATCTCGCCATGG  
CAACCAATACATTCAAGTGAATGAGCCCTGGAAACGGATTAAGGTTGGTGGAGATGGACAGGCAGCGGGCAGGCACAG  
TGACAGGCATGGCAGTGAACATGGCTGCCTTGCTGTCTGTCTGCTGATGCTGCAGCCATACATGCCACAGTCACTTACC  
ATCCAGACCCAGCTGCAGCTCCACCTGCAGCCTGCCGCATCCTTGCCACAAGCTTCATTTGTACCTTGCCAGCAGG  
CCACCGAATTGGCACAGTCACTCCTTTGTTCCAAAACCTGGAAAATGACCAGATTGAAAATTTGAGGCAGCGCTTTG  
GAGGGGGTTCAGGCTAAAGGCTCCCCAAGCCAGCAGCTGTGGAGGCAGTTACAGCAGCAGGCTCGCAGCACATACAA  
ACGCTGACGGATGAGGTGACCAAGCAGGGCAACGTCGTCCGGGAACTGAAAGCACAGAAGGCAGACAAGAACCAGGT  
TGCTGCAGAGGTGGCTAAACTCTTGGATCTAAAGAAACAGTTGGCTTTGGCTGAGGGGAAACCCATTGAAACTCCTA  
AAGGCAAGAAGAAAAAGTGATAACTCGAGTCTAGAGGGCCCGTTTAAACCCGCTGATCAGCCTCGACTGTGCCTTCT  
AGTTGCCAGCCATCTGTTGTTTTGCCCTCCCCCGTGCCTTCCCTTGACCCTGGAAGGTGCCACTCCCCTGTCTTTT  
CTAATAAAATGAGGAAATTCATCGCATTGTCTGAGTAGGTGTCTATTCTATTCTGGGGGTGGGGTGGGGCAGGACA  
GCAAGGGGGAGGATTGGGAAGACAATAGCAGGCATGCTGGGGATGCGGTGGGCTCTATGGCTTCTGAGGCGGAAAGA  
ACCAGCTGGGGCTTAGGGGGTATCCCCACGCGCCCTGTAGCGGCGCATTAAAGCGCGGCGGGTGTGGTGGTTACGCG  
CAGCGTGACCGCTACACTTGCCAGCGCCCTAGCGCCCGCTCCTTTCCGCTTTCTTCCCTTCCCTTCTCGCCACGTTG  
CCGGCTTTCCCGTCAAGCTCTAAATCGGGGGCTCCCTTTAGGGTCCGATTTAGTGCTTTACGGCACCTCGACCCC  
AAAAAATTGATTAGGGTGTGTTTACGTAAGTGGGCCATCGCCCTGATAGACGGTTTTTTCGCCCTTTGACGTTGGA  
GTCCACGTTCTTTAATAGTGGACTCTTGTTCAAAACCTGGAACAACACTCAACCCTATCTCGGTCTATTCTTTTATT  
TATAAGGGATTTTCCGATTTCCGCTATTGGTTAAAAAATGAGCTGATTTAACAAAAATTTAACGCGAATTAATTC  
TGTGGAATGTGTGTGCTAGTTAGGGTGTGGAAAGTCCCCAGGCTCCCCAGCAGGCAGAAGTATGCAAAGCATGCATCTC  
AATTAGTCAGCAACCAGGTGTGGAAAGTCCCCAGGCTCCCCAGCAGGCAGAAGTATGCAAAGCATGCATCTCAATTA  
GTCAGCAACCATAGTCCCGCCCCCTAACTCCGCCATCCCGCCCCCTAACTCCGCCAGTTCCGCCATTCTCCGCC  
ATGGCTGACTAATTTTTTTTTATTTATGAGAGGCGGAGGCCCTCTGCCTCTGAGCTATTCCAGAAGTAGTGAGGA  
GGCTTTTTTGGAGGCCTAGGCTTTTGCAAAAAGCTCCCGGAGCTTGTATATCCATTTTCGGATCTGATCAAGAGAC  
AGGATGAGGATCGTTTCGCATGATTGAACAAGATGGATTGCACGCAGGTTCTCCGGCCGCTTGGGTGGAGAGGCTAT  
TCGGCTATGACTGGGCACAACAGACAATCGGCTGCTCTGATGCCGCCGTGTTCCGGCTGTGAGCGCAGGGGCGCCCG  
GTTCTTTTTGTCAAGACCGACCTGTCCGGTGCCTGAATGAACTGCAGGACGAGGCAGCGCGGCTATCGTGGCTGGC  
CACGACGGGCGTTTCTTGCAGCTGTGCTCGACGTTGTCACTGAAGCGGGAAGGGACTGGCTGCTATTGGGCGAAG  
TGCCGGGGCAGGATCTCCTGTCTCTCACCTTGTCTTCCGAGAAAGTATCCATCATGGCTGATGCAATGCGGCGG  
CTGCATACGCTTGTATCCGGCTACCTGCCATTGACCACCAAGCGAAACATCGCATCGAGCGAGCACGTAATCGGAT  
GGAAGCCGGTCTTGTGATCAGGATGATCTGGACGAAGAGCATCAGGGGCTCGCGCCAGCCGAATGTTCCGCCAGGC  
TCAAGGCGCGCATGCCCGACGGCGAGGATCTCGTCTGACCCATGGCGATGCCTGCTTGCCGAATATCATGGTGGAA

AATGGCCGCTTTTCTGGATTTCATCGACTGTGGCCGGCTGGGTGTGGCGGACCGCTATCAGGACATAGCGTTGGCTAC  
CCGTGATATTGCTGAAGAGCTTGGCGGCGAATGGGCTGACCGCTTCCTCGTGCTTTACGGTATCGCCGCTCCCGATT  
CGCAGCGCATCGCCTTCTATCGCCTTCTTGACGAGTTCTTCTGAGCGGGACTCTGGGGTTCGAAATGACCGACCAAG  
CGACGCCAACCTGCCATCACGAGATTTGATTCCACCGCCGCTTCTATGAAAGGTTGGGCTTCGGAATCGTTTTTC  
CGGGACGCCGGCTGGATGATCCTCCAGCGCGGGGATCTCATGCTGGAGTTCTTCGCCCACCCCACTTGTATTATTGC  
AGCTTATAATGGTTACAAATAAAGCAATAGCATCACAAATTTACAAATAAAGCATTTTTTTCTACTGCATTCTAGTT  
GTGGTTTGTCCAAACTCATCAATGTATCTTATCATGTCTGTATAACCGTCGACCTCTAGCTAGAGCTTGGCGTAATCA  
TGGTCATAGCTGTTTCTGTGTGAAATTGTTATCCGCTCACAATTCACACAACATACGAGCCGGAAGCATAAAGTG  
TAAAGCCTGGGGTGCCTAATGAGTGAGCTAACTCACATTAATTGCGTTGCGCTCACTGCCCCGCTTTCCAGTCGGGAA  
ACCTGTCTGTGCCAGCTGCATTAATGAATCGGCCAACGCGCGGGGAGAGGCGGTTTGCATATTGGGCGCTCTTCCGCT  
TCCTCGCTCACTGACTCGCTGCGCTCGGTCTTCCGCTGCGGCGAGCGGTATCAGCTCAAGGCGGTAATACG  
GTTATCCACAGAATCAGGGGATAACGCAGGAAAGAACATGTGAGCAAAGGCCAGCAAAGGCCAGGAACCGTAAAA  
AGGCCGCGTTGCTGGCGTTTTTCCATAGGCTCCGCCCCCTGACGAGCATCACAAAAATCGACGCTCAAGTCAGAGG  
TGGCGAAACCCGACAGGACTATAAAGATACCAGGCGTTTTCCCCCTGGAAGCTCCCTCGTGCGCTCTCTGTTCCGAC  
CCTGCCGCTTACCGGATACCTGTCCGCTTTTCTCCCTTCGGAAGCGTGGCGCTTTTCTCATAGCTCACGCTGTAGGT  
ATCTCAGTTCCGGTGTAGGTGCTTCCGCTCCAAGCTGGGCTGTGTGCACGAACCCCCCGTTTCAGCCCGACCGCTGCGCC  
TTATCCGGTAACTATCGTCTTGAGTCCAACCCGGTAAGACACGACTTATCGCCACTGGCAGCAGCCACTGGTAACAG  
GATTAGCAGAGCGAGGTATGTAGGCGGTGCTACAGAGTTCTTGAAGTGGTGGCCTAACTACGGCTACACTAGAAGAA  
CAGTATTTGGTATCTGCGCTCTGCTGAAGCCAGTTACCTTCGGAAAAAGAGTTGGTAGCTCTTGATCCGGCAAACAA  
ACCACCGCTGGTAGCGGTTTTTTTTGTTTGAAGCAGCAGATTACGCGCAGAAAAAAGGATCTCAAGAAGATCCTTT  
GATCTTTTCTACGGGGTCTGACGCTCAGTGGAACGAAAACCTCACGTTAAGGGATTTTGGTCATGAGATTATCAAAAA  
GGATCTTACCTAGATCCTTTTTAAATTAATAAATGAAGTTTTAAATCAATCTAAAGTATATATGAGTAAACTTGGTCT  
GACAGTTACCAATGCTTAATCAGTGAGGCACCTATCTCAGCGATCTGTCTATTTTCGTTTCATCCATAGTTGCCTGACT  
CCCCGCTCGTGTAGATAACTACGATACGGGAGGGCTTACCATCTGGCCCCAGTGTGCAATGATACCGCGAGACCCAC  
GCTCACCGGCTCCAGATTTATCAGCAATAAACCAGCCAGCCGGAAGGGCCGAGCGCAGAAGTGGTCTGCAACTTTA  
TCCGCTCCATCCAGTCTATTAATTGTTGCGGGAAGCTAGAGTAAGTAGTTCGCCAGTTAATAGTTTGGCACAACGT  
TGTTGCCATTGCTACAGGCATCGTGGTGTACGCTCGTCTGTTGGTATGGCTTCATTCAGCTCCGGTTCCCAACGAT  
CAAGGCGAGTTACATGATCCCCATGTTGTGCAAAAAAGCGGTTAGCTCCTTCGGTCTCCGATCGTTGTGAGAAGT  
AAGTTGGCCGCGAGTGTATCACTCATGGTTATGGCAGCACTGCATAATTTCTTACTGTGATGCCATCCGTAAGATG  
CTTTTCTGTGACTGGTGAGTACTCAACCAAGTCATTCTGAGAATAGTGTATGCGGCGACCGAGTTGCTCTTGCCCGG  
CGTCAATACGGGATAATACCGCGCCACATAGCAGAACTTTAAAGTGCTCATCATTGGAAAACGTTCTTCCGGGGCGA  
AACTCTCAAGGATCTTACCGCTGTTGAGATCCAGTTCGATGTAACCCACTCGTGCACCCAACTGATCTTCAGCATC  
TTTTACTTTACCAGCGTTTTCTGGGTGAGCAAAAAACAGGAAGGCAAAATGCCGCAAAAAAGGGGAATAAGGGCGACAC  
GGAAATGTTGAATACTCATACTCTTCTTTTTCAATATTATTGAAGCATTATCAGGGTTATTGTCTCATGAGCGGA  
TACATATTTGAATGTATTTAGAAAAATAACAAATAGGGGTTCCGCGCACATTTCCCCGAAAAGTGCCACCTGACGT  
C

Protein Sequence

MAHHHHHMRFLVSEGPSGLPVLAAAARARGRAELLI STVGPEECVVPFLTRPKVPVLQLDSGNYLFSASAICRYF  
FLLCGWEQDDL TNQWLEWEATELQPVLSAALHCLVVQKKGEDILGPLRRVLTHIDHLSLRQNC PFLAGDTE SLADI  
VLWGALYPLLQDPAYLPEELGALQSWFQTLSTQEPQRAAETVLKQQVLA LRLLYLQKQPQP PPEGR TVSNELE  
EEELATLSEEDIVTAVA AWEKGL ESLPPLKLQ QHPVLPV PGER NVLITSAGPYVNNVPHLGNIIGCVLSADVFARYC  
RLRQWNTLYLCGTDEYGTATETKAMEEGLTPREICDKYHAIHADIYRWFGISFDTFGRTTTPQQT KITQDIFQRLLT  
RGFVLRD TVEQLRCERCARFLADR FVEGVCPFCGYEEARGDQC DRGK LINAIELKKPQCKICRSCP VVRSSQHFLF  
DLPKLEKRL EDWLGKTVPGSDWTPNARFI IRSWLRDGLKPRCITRDLKWGTPVPLEGFEDKVFYVWFDATIGYV SIT  
ANYTDQWEKWK NPEQVDLYQFMAKDNVPFHGLVFP CSVLGAEDNYTLVKHI IATEYLN YEDGKFSKSRGIGVFGDM  
AKDTGIPADIWRFYLLYIRPEGQDSAFSWTDLLIKNNSELLNNLGNFINRAGMFVSKFFGGCVPEMALTPDDRRLVA  
HVSWE LQHYHQ LLEKVRIRDALRSILTISRHNQYIQVNEPWKRIKGGEMDRQRAGTVTGMVNMAALLSVMLQPYM  
PTVSS TIQTQLQLPPAACRILATSFICTLPAGHRIGTVSPLFQKLENDQIENLRQRFGGGQAKGSPKPAAVEAVTAA  
GSQHIQTLTDEVTKQGNVRE LKAQKADKNQVA AEVAKLLDLKKQLALAE GKPIETPKGKKKK-

**Figure S3. The pMaRSSLL\_G vector for expression of SLL-MmMetRS under CMV promoter control.** Restriction enzymes are highlighted in yellow and the enzyme coding sequence is highlighted in green. Kozak sequence is highlighted in blue. The expressed protein sequence is included after the plasmid sequence.

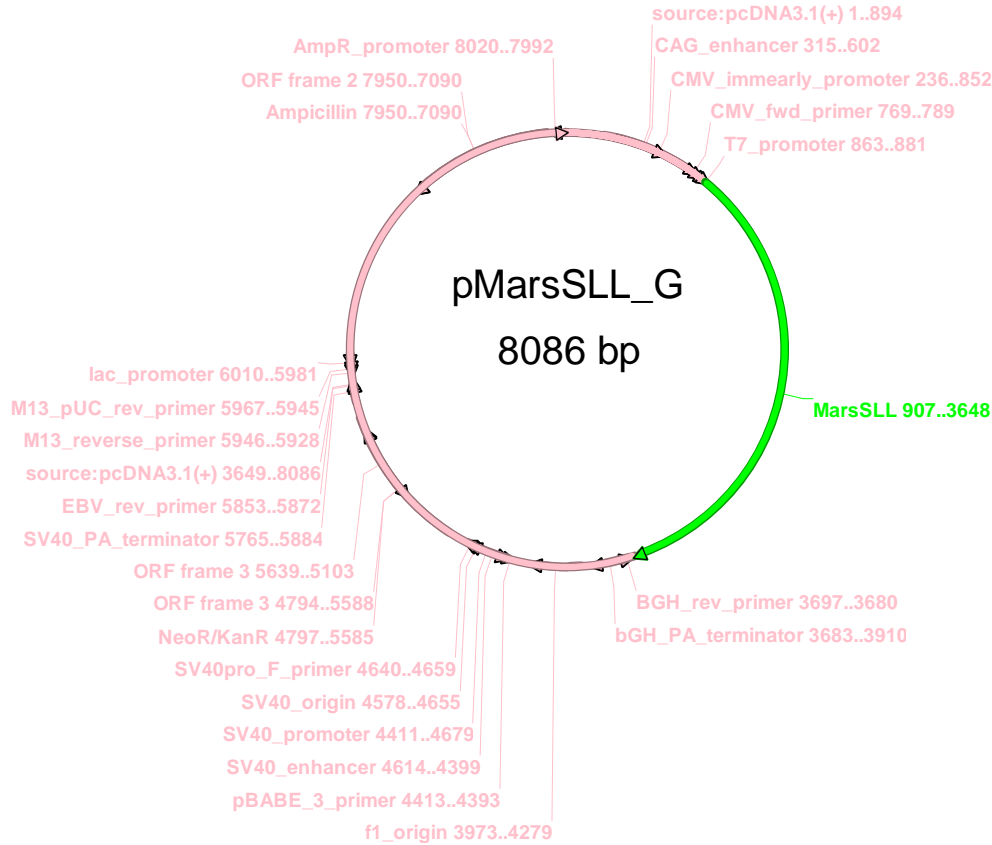

GACGGATCGGGAGATCTCCCATCCCCTATGGTGCACCTCTCAGTACAATCTGCTCTGATGCCGCATAGTTAAGCCAG  
TATCTGCTCCCTGCTTGTGTGTTGGAGGTTCGCTGAGTAGTGCGCGAGCAAAATTTAAGCTACAACAAGGCAAGGCTT  
GACCGACAATTGCATGAAGAATCTGCTTAGGGTTAGGCGTTTTGCGCTGCTTCGCGATGTACGGGCCAGATATACGC  
GTTGACATTGATTATTGACTAGTTATTAATAGTAATCAATTACGGGGTCATTAGTTTCATAGCCCATATATGGAGTTC  
CGCGTTACATAACTTACGGTAAATGGCCCGCCTGGCTGACCGCCCAACGACCCCCGCCATTGACGTCAATAATGAC  
GTATGTTCCCATAGTAACGCCAATAGGGACTTTCCATTGACGTCAATGGGTGGAGTATTTACGGTAAACTGCCCACT  
TGGCAGTACATCAAGTGTATCATATGCCAAGTACGCCCCCTATTGACGTCAATGACGGTAAATGGCCCCGCTGGCAT  
TATGCCAGTACATGACCTTATGGGACTTTCCCTACTTGGCAGTACATCTACGTATTAGTCATCGCTATTACCATGGT  
GATGCGGTTTTGGCAGTACATCAATGGGCGTGGATAGCGGTTTTGACTCACGGGGATTTCCAAGTCTCCACCCATTG  
ACGTCAATGGGAGTTTTGTTTTGGCACCAAAATCAACGGGACTTTCCAAAATGTCGTAACAACCTCCGCCCCATTGACG  
CAAATGGGCGGTAGGCGTGTACGGTGGGAGGTCTATATAAGCAGAGCTCTCTGGCTAACTAGAGAACCCACTGCTTA  
CTGGCTTATCGAAATTAATACGACTCACTATAGGGAGACCCAAGCTGGCTAGC**GCCACC**ATGGCCCCACCATCACCAT  
CACCAT**ATGAGACTGTTTCGTGAGCGAGGGTTCCCCGGGGAGCCTGCCCGTGGCTGGCTGCGGCCGCGAGGGCGGGG**  
**TCGGGCGGAGCTGCTCATCAGCACCGTAGGCCCGAAGAGTGTGTGGTACCATTCCCTACCCGGCCTAAGGTCCTTG**  
**TCTTGCAGCTGGATAGTGGCAACTACCTCTTCTCTGCTAGTGCAATCTGCCGATATTTTTTCTGTTATGTGGCTGG**  
**GAACAAGATGATCTCACCAACCAGTGGCTGGAATGGGAGGCAACAGAAGTGCAGCCAGTTCTGTCTGCTGCCCTACA**  
**CTGTCTAGTGGTTCAAGGCAAGAAAGGGGAAGATATACTTGGCCCACTTCGGAGAGTCTGACTCACATTGATCACA**  
**GCTTGAGTCGTCAAAACTGTCCTTTTCTGGCTGGGGACACAGAATCTCTAGCTGACATTGTTTTGTGGGGAGCACTG**  
**TATCCTTTACTGCAAGACCCAGCTTACCTCCCTGAGGAGTTGGGTGCCCTGCAAAGTTGGTTCAGACACTGAGTAC**

CCAGGAACCGTGTGAGCGAGCTGCAGAGACGGTGCTAAAACAGCAGGGTGTCTGGCACTTCGTCTGTACCTCCAGA  
AACAGCCACAGCCTCAGCCCCGCCTCCTGAGGGGAGAAGTGTGAGCAACGAGCTGGAGGAAGAGGAACTGGCTACC  
TTGTCTGAGGAGGACATCGTTACAGCTGTTGCCGCGTGGGAGAAGGGTCTGGAAAGCCTGCCTCCGCTAAAGCTCCA  
GCAGCATCCAGTGTTCCTGTGCCTGGAGAGAGGAATGTTCTCATCACCAGTGCCTCCCCCTATGTCAACAATGTCC  
CCCACCTTGAAACATCATTGGCTGTGTGCTCAGTGCTGATGTCTTTGCAAGGTATTGTGCGCTTCGCCAGTGGAA  
ACCTCTATCTGTGTGGTACAGATGAGTATGGTACTGCGACAGAGACCAAGGCCATGGAGGAGGGCCTAACCCACG  
GGAAATCTGTGACAAGTACCATGCCATCCATGCTGACATCTACCGCTGGTTCGGCATATCGTTCGATACTTTCGGGC  
GCACTACCACTCCTCAGCAGACAAAATCACCCAGGACATCTTCCAGAGGTGCTGACCCGGGGGTTTGTGCTGCGA  
GATACTGTGGAGCAGCTTCGGTGTGAGCGGTGTGCACGTTTCCCTGGCTGACCGCTTTGTGGAGGGTGTGTGTCCCTT  
CTGTGGCTATGAAGAGGCCCGAGGTGACCAGTGTGACAGGTGTGGCAAGCTCATCAATGCCATTGAGCTCAAGAAAC  
CACAGTGCAAAATCTGCCGCTCCTGCCCTGTGGTGGAGTCTCACAGCACCTGTTTCTAGACTTGCCTAAGTTGGAA  
AAGCGTCTGGAGGACTGGTTGGGAAGACAGTGCCTGGCAGTACTGGACACCCAATGCCAGGTTTATTATACGTTT  
CTGGCTTCGAGATGGCCTCAAGCCACGATGCATCACCAGAGACCTCAAATGGGGAACGCCTGTGCCCTTGAAGGTT  
TTGAGGACAAGGTATTTTACGTCTGGTTTGTGCTACTATTGGCCTGGTGTCCATCACAGCCAATACACAGACCA  
TGGGAGAAATGGTGAAGAACCAGAAACAGTGGACCTTTACCAGTTCATGGCCAAAGACAATGTTCCCTTCCCTGGG  
CTTGGTCTTTCCGTTTCCAGTCTTAGGAGCTGAGGACAACCTACACCCTGGTCAAGCACATCATTGCTACAGAGTACC  
TGAACTATGAGGATGGAAATTTCTCTAAGAGCCGGGGCATAGGAGTGTGGAGACATGGCCAAGGATACAGGAATC  
CCTGCTGACATCTGGCGATTCTATCTGCTATAACCTCGGCCTGAGGGCCAGGACAGTGCCTTCTCCTGGACAGACTT  
GTTGATTAATAACAATTTGAGCTGCTCAACAACCTGGGCAACTTCATCAACAGAGCTGGCATGTTTGTCTTAAGT  
TTTTTGGCGGTTGTGTGCCTGAGATGGCGCTAACCCCTGATGACAGACGCCTGGTGGCCCATGTCTCTTGGGAACTC  
CAGCACTATCACCAGCTGTTGGAAAAGGTTCCGGATCCGGGATGCCTTGCGCAGTATCCTCACCATATCTCGCCATGG  
CAACCAATACATTCAAGTGAATGAGCCCTGGAAACGGATTAAGGTTGGTGGAGATGGACAGGCAGCGGGCAGGCACAG  
TGACAGGCATGGCAGTGAACATGGCTGCCTTGCTGTCTGTGATGCTGCAGCCATACATGCCACAGTCACTCTACC  
ATCCAGACCCAGCTGCAGCTCCCACCTGCAGCCTGCCGATCCTTGCCACAAGCTTCATTTGTACCTTGGCAGCAGG  
CCACCGAATTGGCACAGTCACTCCTTTGTTCCAAAACCTGGAAAATGACCAGATTGAAAATTTGAGGCAGCGCTTTG  
GAGGGGGTTCAGGCTAAAGGCTCCCCAACCCAGCAGCTGTGGAGGCAGTTACAGCAGCAGGCTCGCAGCACATACAA  
ACGCTGACGGATGAGGTGACCAAGCAGGGCAACGTCGTCGGGAACTGAAAGCACAGAAGGCAGACAAGAACCAGGT  
TGCTGCAGAGGTGGCTAAACTCTTGGATCTAAAGAAACAGTTGGCTTTGGCTGAGGGGAAACCCATTGAAACTCCTA  
AAGGCAAGAAGAAAAAGTGATAA

CTCGAGTCTAGAGGGCCCGTTTAAACCCGCTGATCAGCCTCGACTGTGCCTTCT  
AGTTGCCAGCCATCTGTTGTTTGGCCCTCCCCCGTGCCTTCTTGGACCCCTGGAAGGTGCCACTCCCCTGTCTTTCT  
CTAATAAAATGAGGAAATTGCATCGCATTGTCTGAGTAGGTGTGATTCTATTCTGGGGGGTGGGGTGGGGCAGGACA  
GCAAGGGGGGAGGATTGGGAAGACAATAGCAGGCATGCTGGGGATGCGGTGGGCTCTATGGCTTCTGAGGCGGAAAGA  
ACCAGCTGGGGCTCTAGGGGGTATCCCCACGCGCCCTGTAGCGGGCGCATTAAAGCGCGGGCGGGTGTGGTGGTTACGCG  
CAGCGTGACCGCTACACTTGCCAGCGCCCTAGCGCCCGCTCCTTTTCGCTTTCTTCCCTTCTTCTCGCCACGTTTCG  
CCGGCTTTCCCGTCAAGCTCTAAATCGGGGGCTCCCTTTAGGGTTCGATTTAGTGCTTTACGGCACCTCGACCCC  
AAAAAATTTGATTAGGGTGTGTTTACGTAAGTGGGCCATCGCCCTGATAGACGGTTTTTTCGCCCTTTGACGTTGGA  
GTCCACGTTCTTTAATAGTGGACTCTTGTTCAAAACCTGGAACAACACTCAACCCTATCTCGGTCTATTCTTTTGTGATT  
TATAAGGGATTTTGGCGATTTCCGCTATTGGTTAAAAAATGAGCTGATTTAACAAAAATTTAACGCGAATTAATTC  
TGTGGAATGTGTGTCAGTTAGGGTGTGGAAAGTCCCCAGGCTCCCCAGCAGGCAGAAGTATGCAAAGCATGCATCTC  
AATTAGTCAGCAACCAGGTGTGGAAAGTCCCCAGGCTCCCCAGCAGGCAGAAGTATGCAAAGCATGCATCTCAATTA  
GTCAGCAACCATAGTCCCAGCCCTAACTCCGCCCCTAACCTCCGCCCCTAACCTCCGCCCAGTTCCGCCCATTCTCCGCCC  
ATGGCTGACTAATTTTTTTTTATTTATGCAGAGGCCGAGGCCGCTCTGCCTCTGAGCTATTCCAGAAGTAGTGAGGA  
GGCTTTTTTGGAGGCCTAGGCTTTTGCAAAAAGCTCCCGGGAGCTTGTATATCCATTTTCGGATCTGATCAAGAGAC  
AGGATGAGGATCGTTTCGCATGATTGAACAAGATGGATTGCACGCAGGTTCTCCGGCCGCTTGGGTGGAGAGGCTAT  
TCGGCTATGACTGGGCACAACAGACAATCGGCTGCTCTGATGCCGCCGTGTTCCGGCTGTGAGCGCAGGGGCGCCCG  
GTTCTTTTTGTCAAGACCGACCTGTCCGGTGCCTGAATGAACTGCAGGACGAGGCAGCGCGGCTATCGTGGCTGGC  
CACGACGGGCTTCTTGGCAGCTGTGCTCGACGTTGTACTGAAGCGGGAAGGGACTGGCTGCTATTGGGCGAAG  
TGCCGGGGCAGGATCTCCTGTCTCCTGCTCCTGCCGAGAAAGTATCCATCATGGCTGATGCAATGCGGCGG  
CTGCATACGCTTGATCCGGCTACCTGCCATTCCGACCACCAAGCGAAACATCGCATCGAGCGAGCACGTA



GGAAGCCGGTCTTGTTCGATCAGGATGATCTGGACGAAGAGCATCAGGGGCTCGCGCCAGCCGAACCTGTTTCGCCAGGC  
TCAAGGCGCGCATGCCCGACGGCGAGGATCTCGTCTGACCCATGGCGATGCCTGCTTGCCGAATATCATGGTGGAA  
AATGGCCGCTTTTCTGGATTTCATCGACTGTGGCCGGCTGGGTGTGGCGGACCGCTATCAGGACATAGCGTTGGCTAC  
CCGTGATATTGCTGAAGAGCTTGGCGGCGAATGGGCTGACCGCTTCTCTGCTGCTTTACGGTATCGCCGCTCCCGATT  
CGCAGCGCATCGCCTTCTATCGCCTTCTTGACGAGTTCTTCTGAGCGGGACTCTGGGGTTCGAAATGACCGACCAAG  
CGACGCCAACCTGCCATCACGAGATTTGATTCCACCGCCGCTTCTATGAAAGGTTGGGCTTCGGAATCGTTTTTC  
CGGGACGCCGGCTGGATGATCCTCCAGCGCGGGGATCTCATGCTGGAGTTCTTCGCCACCCCAACTTGTTTTATTGC  
AGCTTATAATGGTTACAAATAAAGCAATAGCATCACAAATTTACAAATAAAGCATTTTTTTTCACTGCATTCTAGTT  
GTGGTTTGTCCAAACTCATCAATGTATCTTATCATGTCTGTATACCGTTCGACCTCTAGCTAGAGCTTGGCGTAATCA  
TGGTCATAGCTGTTTCTGTGTGAAATTGTTATCCGCTCACAATTCACACAACATACGAGCCGGAAGCATAAAGTG  
TAAAGCCTGGGGTGCCTAATGAGTGAGCTAACTCACATTAATTGCGTTGCGCTCACTGCCCGCTTTCAGTCCGGAA  
ACCTGTCTGTCAGCTGCATTAATGAATCGCCAACGCGCGGGGAGAGGCGGTTTTCGCTATTGGGCGCTCTTCCGCT  
TCCTCGCTCACTGACTCGCTGCGCTCGGTCTTTCGGCTGCGGCGAGCGGTATCAGCTCACTCAAAGGCGGTAATACG  
GTTATCCACAGAATCAGGGGATAACGCAGGAAAGAACATGTGAGCAAAAGGCCAGCAAAAGGCCAGGAACCGTAAAA  
AGGCCGCGTTGCTGGCGTTTTTCCATAGGCTCCGCCCCCTGACGAGCATCACAAAAATCGACGCTCAAGTCAGAGG  
TGGCGAAACCCGACAGGACTATAAAGATAACCAGGCGTTTTCCCCCTGGAAGCTCCCTCGTGCCTCTCCTGTTCCGAC  
CCTGCCGCTTACCGGATACCTGTCCGCTTTTCTCCCTTTCGGAAGCGTGGCGTTTTCTCATAGCTCACGCTGTAGGT  
ATCTCAGTTCGGTGTAGGTCTGTTCCGCTCCAAGCTGGGCTGTGTGCACGAACCCCCGTTTCAGCCCGACCGCTGCGCC  
TTATCCGGTAACTATCGTCTTGAGTCCAACCCGGTAAGACACGACTTATCGCCACTGGCAGCAGCCACTGGTAACAG  
GATTAGCAGAGCGAGGTATGTAGGCGGTGCTACAGAGTTCTTGAAGTGGTGGCCTAACTACGGCTACACTAGAAGAA  
CAGTATTTGGTATCTGCGCTCTGCTGAAGCCAGTTACCTTCGGAAAAAGAGTTGGTAGCTCTTGATCCGGCAAACAA  
ACCACCGCTGGTAGCGGTTTTTTTTGTTTGAAGCAGCAGATTACGCGCAGAAAAAAGGATCTCAAGAAGATCCTTT  
GATCTTTTCTACGGGTCTGACGCTCAGTGAACGAAAACCTCACGTTAAGGGATTTTGGTCATGAGATTATCAAAAA  
GGATCTTACCTAGATCCTTTTTAAATTAATAAATGAAGTTTTAAATCAATCTAAAGTATATATGAGTAACTTGGTCT  
GACAGTTACCAATGCTTAATCAGTGAGGCACCTATCTCAGCGATCTGTCTATTTTCGTTTCATCCATAGTTGCCTGACT  
CCCCGCTCGTGTAGATAACTACGATACGGGAGGGCTTACCATCTGGCCCCAGTGTGCAATGATACCGCGAGACCCAC  
GCTCACCGCTCCAGATTTATCAGCAATAAACCAGCCAGCCGGAAGGGCCGAGCGCAGAAGTGGTCCTGCAACTTTA  
TCCGCTCCATCCAGTCTATTAATTGTTGCCGGAAGCTAGAGTAAGTAGTTCCGCCAGTTAATAGTTTTCGCAACGT  
TGTTGCCATTGCTACAGGCATCGTGGTGTACGCTCGTCTGTTGGTATGGCTTCATTTCAGCTCCGGTTCCTAACGAT  
CAAGGCGAGTTACATGATCCCCATGTTGTGCAAAAAAGCGGTTAGCTCCTTCGGTCTCCGATCGTTGTCAGAAGT  
AAGTTGGCCGAGTGTATCACTCATGGTTATGGCAGCACTGCATAATTCTCTTACTGTATGCCATCCGTAAGATG  
CTTTTCTGTGACTGGTGTGACTCAACCAAGTCATTCTGAGAATAGTGTATGCGGCGACCGAGTTGCTCTTGGCCGG  
CGTCAATACGGGATAATACCGCGCCACATAGCAGAACTTTAAAGTGCTCATCATTGGAAAACGTTCTTCCGGGGCGA  
AAACTCTCAAGGATCTTACCGCTGTTGAGATCCAGTTCGATGTAACCCACTCGTGCACCCAACTGATCTTTCAGCATC  
TTTTACTTTTACCAGCGTTTTCTGGGTGAGCAAAAACAGGAAGGCAAAATGCCGCAAAAAAGGGAATAAGGGCGACAC  
GGAAATGTTGAATACTCATACTCTTCTTTTTCAATATTATTGAAGCATTATCAGGGTTATTGTCTCATGAGCGGA  
TACATATTTGAATGTATTTAGAAAAATAACAAATAGGGGTTCCGCGCACATTTCCCCGAAAAGTGCCACCTGACGT  
C

MAHHHHHMRLLFVSEGPSGLPVLAAAARARGRAELLI STVGPEECVVPFLTRPKVPVLQLDSGNYLFSASAICRYF  
FLLCGWEQDDLTNQWLEWEATELQPVLSAALHCLVVQKKGEDILGPLRRVLTHIDHLSLRQNCPLFLAGDTESLADI  
VLWGALYPLLQDPAYLPEELGALQSWFQTLSTQEPQRAAETVLKQOQVLALRLYLQKQPQPQPPPEGRTVSNELE  
EEELATLSEEDIVTAVAWEKGLLESLPPLKQQHPVLPVPGERNVLITSASPYVNNVPHLGNII GCVLSADV FARYC  
RLRQWNTLYLCGTDEYGTATETKAMEEGLTPREICDKYHAIHADIYRWFGISFDTFGRTTTPQQTKITQDIFQRLLT  
RGFVLRDTVEQLRCERCARFLADRFEVGVCPFCGYEEARGDQCDRCGLKINAIELKKPQCKICRSCPVVRSSQHLFL  
DLPKLEKRLDNLGKTVPGSDWTPNARFI IRSWLRDGLKPRCITRDLKWGTVPLEGFEDKVFYVWFDATIGLVSIT  
ANYTDQWEKWKWNPEQVDLYQFMAKDNVPFLGLVFPVSVLGAEDNYTLVKHIIATEYLNVEDGKFSKSRGIGVFGDM  
AKDTGIPADIWRFYLLYIRPEGQDSAFSWTDLIKNNSELLNNGFNINRAGMFVSKFFGGCVPEMALTTPDDRRLVA  
HVSWELOHYHQLLEKVRIRDALRSILTISRHNQYIQVNEPWKRIKGGEMDRQRAGTVTGMVNMMAALLSVMLQPYM  
PTVSSTIQTLQLPPAACRILATSFICTLPAGHRIGTVSPLFQKLENDQIENLRQRFGGGQAKGSPKPAAVEAVTAA  
GSQHIQTLTDEVTKQGNVVRELKAQKADKNQVAEVAKLLDLKKQLALAEKPIETPKGKKKK--

**Figure S4. The pMarsPLL\_G vector for expression of PLL-MmMetRS under CMV promoter control.** Restriction enzymes are highlighted in yellow and the enzyme coding sequence is highlighted in green. Kozak sequence is highlighted in blue. The expressed protein sequence is included after the plasmid sequence.

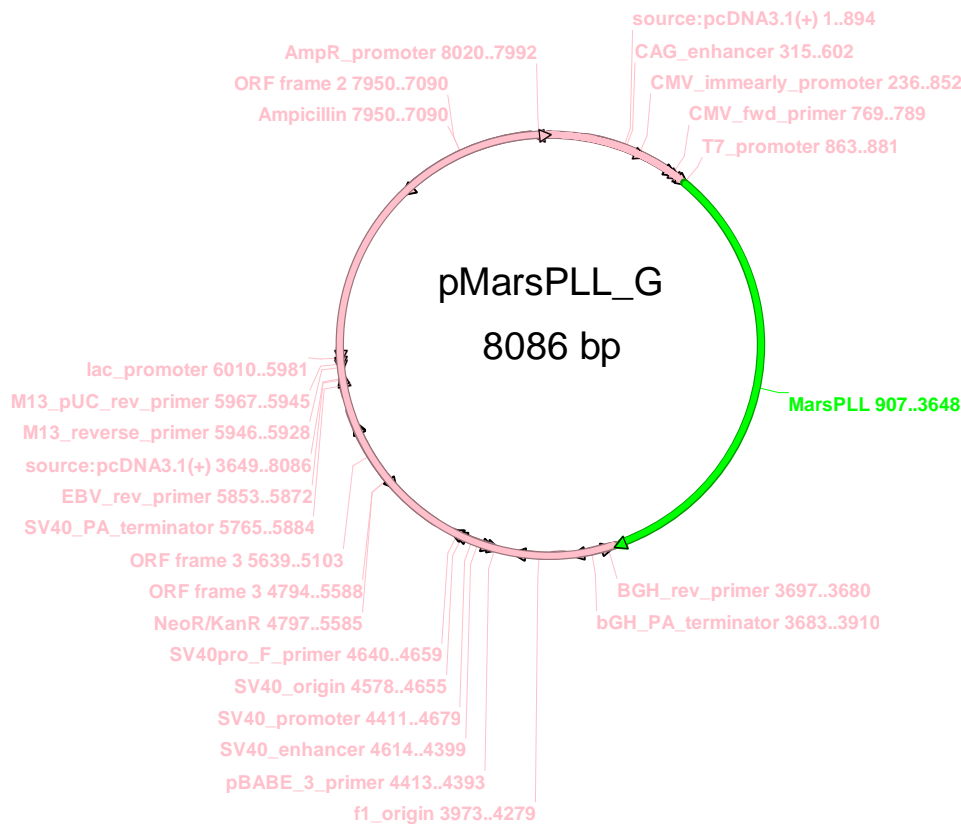

GACGGATCGGGAGATCTCCCGATCCCCTATGGTGCACCTCTCAGTACAATCTGCTCTGATGCCGCATAGTTAAGCCAG  
TATCTGCTCCCTGCTTGTGTGTTGGAGGTCGCTGAGTAGTGCGCGAGCAAAATTTAAGCTACAACAAGGCAAGGCTT  
GACCGACAATTGCATGAAGAATCTGCTTAGGGTTAGGCGTTTTTGGCGTCTCGCGATGTACGGGCCAGATATACGC  
GTTGACATTGATTATTGACTAGTTATTAATAGTAATCAATTACGGGGTCATTAGTTTCATAGCCCATATATGGAGTTC  
CGCGTTACATAACTTACGGTAAATGGCCCGCCTGGCTGACCGCCCAACGACCCCCGCCATTGACGTCAATAATGAC  
GTATGTTCCCATAGTAACGCCAATAGGGACTTTCCATTGACGTCAATGGGTGGAGTATTTACGGTAAACTGCCCACT  
TGGCAGTACATCAAGTGTATCATATGCCAAGTACGCCCCCTATTGACGTCAATGACGGTAAATGGCCCGCCTGGCAT  
TATGCCAGTACATGACCTTATGGGACTTTCTACTTGGCAGTACATCTACGTATTAGTCATCGCTATTACCATGGT  
GATGCGGTTTTGGCAGTACATCAATGGGCGTGGATAGCGGTTTTGACTCACGGGGATTTCCAAGTCTCCACCCCATTG  
ACGTCAATGGGAGTTTTGTTTTGGCACAAAATCAACGGGACTTTCCAAAATGTCGTAACAACCTCCGCCCATTGACG  
CAAATGGGCGGTAGGCGTGTACGGTGGGAGGTCTATATAAGCAGAGCTCTCTGGCTAACTAGAGAACCCACTGCTTA  
CTGGCTTATCGAAATTAATACGACTCACTATAGGGAGACCCAAGCTGGCTAGC**GCCACC**ATGGCCACCATCACCAT  
CACCAT**ATGAGACTGTTTCGTGAGCGAGGGTTCCCCGGGGAGCCTGCCCGTGTGGCTGCGGCCGCGAGGGCCCCGGGG**  
**TCGGGCGGAGCTGCTCATCAGCACCGTAGGCCCGAAGAGTGTGTGGTACCATTCCCTTACCCGGCCTAAGGTCCCTG**  
**TCTTGCAGCTGGATAGTGGAACCTACCTCTTCTCTGCTAGTGCAATCTGCCGATATTTTTTCTGTTATGTGGCTGG**  
**GAACAAGATGATCTCACCAACCAGTGGCTGGAATGGGAGGCAACAGAAGTGCAGCCAGTTCTGTCTGCTGCCCTACA**  
**CTGTCTAGTGGTTCAAGGCAAGAAAGGGGAAGATATACTTGGCCCACTTCGGAGAGTCTGACTCACATTGATCACA**  
**GCTTGAGTCGTCAAACTGTCCTTTCTGGCTGGGGACACAGAATCTCTAGCTGACATTGTTTTGTGGGGAGCACTG**

TATCCTTTACTGCAAGACCCAGCTTACCTCCCTGAGGAGTTGGGTGCCCTGCAAAGTTGGTTCCAGACACTGAGTAC  
CCAGGAACCGTGTGAGCGAGCTGCAGAGACGGTGTAAAACAGCAGGGTGTCTGGCACTTCGTCTGTACCTCCAGA  
AACAGCCACAGCCTCAGCCCCGCCTCCTGAGGGGAGAAGTGTGCAACAGAGCTGGAGGAAGAGGAACTGGCTACC  
TTGTCTGAGGAGGACATCGTTACAGCTGTTGCCGCGTGGGAGAAGGGTCTGGAAAGCCTGCCTCCGCTAAAGCTCCA  
GCAGCATCCAGTGTTCCTGTGCCTGGAGAGAGGAATGTTCTCATCACCAGTGCCCCACCCTATGTCAACAATGTCC  
CCCACCTTGGAAACATCATTGGCTGTGTGCTCAGTGCTGATGTCTTTGCAAGGTATTGTGCGCTTCGCCAGTGGAA  
ACCCTCTATCTGTGTGGTACAGATGAGTATGGTACTGCGACAGAGACCAAGGCCATGGAGGAGGGCCTAACCCACG  
GGAAATCTGTGACAAGTACCATGCCATCCATGCTGACATCTACCGCTGGTTCGGCATATCGTTTCGATACTTTTCGGGC  
GCACTACCACTCCTCAGCAGACCAAAATCACCCAGGACATCTTCCAGAGGTTGCTGACCCGGGGGTTTGTGTGCGA  
GATACTGTGGAGCAGCTTCGGTGTGAGCGGTGTGCACGTTTCCCTGGCTGACCGCTTTGTGGAGGGTGTGTGTCCCTT  
CTGTGGCTATGAAGAGGCCCGAGGTGACCAGTGTGACAGGTGTGGCAAGCTCATCAATGCCATTGAGCTCAAGAAAC  
CACAGTGCAAAATCTGCCGCTCCTGCCCTGTGGTGGAGTCTCACAGCACCTGTTTCTAGACTTGCCTAAGTTGGAA  
AAGCGTCTGGAGGACTGGTTGGGGAAGACAGTGCCTGGCAGTACTGGACACCCAATGCCAGGTTTATTATACGTTT  
CTGGCTTCGAGATGGCCTCAAGCCACGATGCATCACCAGAGACCTCAAATGGGGAACGCCTGTGCCCTTGGAAAGTT  
TTGAGGACAAGGTATTTTACGTCTGGTTTGTATGCTACTATTGGCCTGGTGTCCATCACAGCCAACACTACACAGACCA  
TGGGAGAAATGGTGGAAAGAACCAGAAACAAGTGGACCTTTACCAGTTCATGGCCAAAGACAATGTTCCCTTCCCTGGG  
CTTGGTCTTTCCGTGTTTTCAGTCTTAGGAGCTGAGGACAACACTACACCCTGGTCAAGCACATCATTGCTACAGAGTACC  
TGAACATGAGGATGGGAAATCTCTAAGAGCCGGGGCATAGGAGTGTGGAGACATGGCCAAGGATACAGGAATC  
CCTGCTGACATCTGGCGATTCTATCTGCTATACATTCGGCCTGAGGGCCAGGACAGTGCCTTCTCCTGGACAGACTT  
GTTGATTAATAACAATTCTGAGCTGCTCAACAACCTGGGCAACTTCATCAACAGAGCTGGCATGTTTGTCTTAAGT  
TTTTTGGCGGTTGTGTGCCTGAGATGGCGCTAACCCCTGATGACAGACGCCTGGTGGCCCATGTCTCTTGGGAACTC  
CAGCACTATCACCAGCTGTTGGAAAAGGTTCCGGATCCGGGATGCCTTGCGCAGTATCCTCACCATATCTCGCCATGG  
CAACCAATACATTCAAGTGAATGAGCCCTGGAAACGGATTAAGGTTGGTGGAGATGGACAGGCAGCGGGCAGGCACAG  
TGACAGGCATGGCAGTGAACATGGCTGCCTTGCTGTCTGTGATGCTGCAGCCATACATGCCACAGTCACTCTACC  
ATCCAGACCCAGCTGCAGCTCCACCTGCAGCCTGCCGCATCCTTGCCACAAGCTTCATTTGTACCTTGCCAGCAGG  
CCACCGAATTGGCACAGTCACTCCTTTGTTCCAAAACACTGGAAAATGACCAGATTGAAAATTTGAGGCAGCGCTTTG  
GAGGGGGTTCAGGCTAAAGGCTCCCCCAAGCCAGCAGCTGTGGAGGCAGTTACAGCAGCAGGCTCGCAGCACATACAA  
ACGCTGACGGATGAGGTGACCAAGCAGGGCAACGTCGTCCGGAACTGAAAGCACAGAAGGCAGACAAGAACCAGGT  
TGCTGCAGAGGTGGCTAAACTCTTGGATCTAAAGAAACAGTTGGCTTTGGCTGAGGGGAAACCCATTGAAACTCCTA  
AAGGCAAGAAGAAAAAGTGATAA

CTCGAGTCTAGAGGGCCCGTTTAAACCCGCTGATCAGCCTCGACTGTGCCTTCT  
AGTTGCCAGCCATCTGTTGTTTGGCCCTCCCCCGTGCCTTCCCTTGACCCTGGAAGGTGCCACTCCCCTGTCTTTT  
CTAATAAAATGAGGAAATTGCATCGCATTGTCTGAGTAGGTGTCATTCTATTCTGGGGGGTGGGGTGGGGCAGGACA  
GCAAGGGGGGAGGATTGGGAAGACAATAGCAGGCATGCTGGGGATGCGGTGGGCTCTATGGCTTCTGAGGCGGAAAGA  
ACCAGCTGGGGCTCTAGGGGGTATCCCCACGCGCCCTGTAGCGGCGCATTAAAGCGCGGGCGGGTGTGGTGGTTACCGG  
CAGCGTGACCGCTACACTTGCCAGCGCCCTAGCGCCCGCTCCTTTTCGCTTTCTTCCCTTCCCTTCTCGCCACGTTTCG  
CCGGCTTTCCCGCTCAAGCTCTAAATCGGGGGCTCCCTTTAGGGTTCGGATTTAGTGCTTTACGGCACCTCGACCCC  
AAAAAACTTGATTAGGGTGTGGTTTACGTAAGTGGGCCATCGCCCTGATAGACGGTTTTTTTCGCCCTTTGACGTTGGA  
GTCCACGTTCTTTAATAGTGGACTCTTGTTCAAAACACTGGAACAACACTCAACCCTATCTCGGTCTATTCTTTTGATT  
TATAAGGGATTTTGGCGATTTCCGGCTATTGGTTAAAAAATGAGCTGATTTAACAAAAATTTAACGCGAATTAATTC  
TGTGGAATGTGTGTGAGTTAGGGTGTGGAAAGTCCCCAGGCTCCCCAGCAGGCAGAAGTATGCAAAGCATGCATCTC  
AATTAGTCAGCAACCAGGTGTGGAAAGTCCCCAGGCTCCCCAGCAGGCAGAAGTATGCAAAGCATGCATCTCAATTA  
GTCAGCAACCATAGTCCCGCCCCTAACCTCCGCCCATCCCGCCCCTAACCTCCGCCCAGTTCCGCCCATTCTCCGCCCC  
ATGGCTGACTAATTTTTTTTTATTTATGCAGAGGCCGAGGCCGCTCTGCCTCTGAGCTATTCCAGAAGTAGTGAGGA  
GGCTTTTTTTGGAGGCCTAGGCTTTTGCAAAAGCTCCCGGGGAGCTTGTATATCCATTTTTCGGATCTGATCAAGAGAC  
AGGATGAGGATCGTTTTCGCATGATTGAACAAGATGGATTGCACGCAGGTTCTCCGGCCGCTTGGGTGGAGAGGCTAT  
TCGGCTATGACTGGGCACAACAGACAATCGGCTGCTCTGATGCCGCCGTGTTCCGGCTGTGAGCGCAGGGGCGCCCCG  
GTTCTTTTTTGTCAAGACCGACCTGTCCGGTGCCTGAATGAACTGCAGGACGAGGCAGCGCGGCTATCGTGGCTGGC  
CACGACGGGCGTTTCTTGGCAGCTGTGCTCGACGTTGTCACTGAAGCGGGAAGGGACTGGCTGCTATTGGGCGAAG  
TGCCGGGGCAGGATCTCCTGTCTCATCTCACCTTGTCTCCTGCCGAGAAAGTATCCATCATGGCTGATGCAATGCGGCGG

CTGCATACGCTTGATCCGGCTACCTGCCCATTGACCACCAAGCGAAACATCGCATCGAGCGAGCACGTACTCGGAT  
GGAAGCCGGTCTTGTTCGATCAGGATGATCTGGACGAAGAGCATCAGGGGCTCGCGCCAGCCGAACTGTTCCGCCAGGC  
TCAAGGCGCGCATGCCCGACGGCGAGGATCTCGTCGTGACCCATGGCGATGCCTGCTTGCCGAATATCATGGTGGAA  
AATGGCCGCTTTTCTGGATTTCATCGACTGTGGCCGGCTGGGTGTGGCGGACCGCTATCAGGACATAGCGTTGGCTAC  
CCGTGATATTGCTGAAGAGCTTGGCGGCGAATGGGCTGACCGCTTCTCGTGCTTTACGGTATCGCCGCTCCCGATT  
CGCAGCGCATCGCCTTCTATCGCCTTCTTGACGAGTTCTTCTGAGCGGGACTCTGGGGTTCGAAATGACCGACCAAG  
CGACGCCAACCTGCCATCACGAGATTCGATTCCACCGCCGCTTCTATGAAAGGTTGGGCTTCGGAATCGTTTTTC  
CGGGACGCCGGCTGGATGATCCTCCAGCGCGGGGATCTCATGCTGGAGTTCTTCGCCCACCCCACTTGTATTATTGC  
AGCTTATAATGGTTACAAATAAAGCAATAGCATCACAAATTTACAAATAAAGCATTTTTTTTCACTGCATTCTAGTT  
GTGGTTTGTCCAAACTCATCAATGTATCTTATCATGTCTGTATACCGTCGACCTCTAGCTAGAGCTTGGCGTAATCA  
TGGTTCATAGCTGTTTTCTGTGTGAAATTGTTATCCGCTCACAATTCACACAACATACGAGCCGGAAGCATAAAGTG  
TAAAGCCTGGGGTGCCTAATGAGTGAGCTAACTCACATTAATTGCGTTGCGCTCACTGCCCGCTTTCAGTCGGGAA  
ACCTGTCTGTCAGCTGCATTAATGAATCGGCCAACGCGCGGGGAGAGGCGGTTTTGCGTATTGGGCGCTCTTCCGCT  
TCCTCGCTCACTGACTCGCTGCGCTCGGTGCTTCCGCTGCGGCGAGCGGTATCAGCTCACTCAAAGGCGGTAATACG  
GTTATCCACAGAATCAGGGGATAACGCAGGAAAGAACATGTGAGCAAAAAGGCCAGCAAAAAGGCCAGGAACCGTAAAA  
AGGCCGCGTTGCTGGCGTTTTTCCATAGGCTCCGCCCCCTGACGAGCATCACAAAAATCGACGCTCAAGTCAGAGG  
TGGCGAAACCCGACAGGACTATAAAGATAACCAGGCGTTTTCCCCTGGAAGCTCCCTCGTGCGCTCTCCTGTTCCGAC  
CCTGCCGCTTACCGGATACCTGTCCGCTTTCTCCCTTCGGGAAGCGTGGCGCTTCTCATAGCTCACGCTGTAGGT  
ATCTCAGTTCGGTGTAGGTGCTTCCGCTCCAAGCTGGGCTGTGTGCACGAACCCCCGTTTCAGCCCGACCGCTGCGCC  
TTATCCGGTAACTATCGTCTTGAGTCCAACCCGGTAAGACACGACTTATCGCCACTGGCAGCAGCCACTGGTAACAG  
GATTAGCAGAGCGAGGTATGTAGGCGGTGCTACAGAGTTCTTGAAGTGGTGGCCTAACTACGGCTACACTAGAAGAA  
CAGTATTTGGTATCTGCGCTCTGCTGAAGCCAGTTACCTTCGGAAAAAGAGTTGGTAGCTCTTGATCCGGCAAACAA  
ACCACCGCTGGTAGCGTTTTTTTTGTTTGAAGCAGCAGATTACGCGCAGAAAAAAGGATCTCAAGAAGATCCTTT  
GATCTTTTTCTACGGGTCTGACGCTCAGTGAACGAAAACCTCACGTTAAGGGATTTTTGGTCATGAGATTATCAAAAA  
GGATCTTACCTAGATCCTTTTTAAATTAATAAATGAAGTTTTAAATCAATCTAAAGTATATATGAGTAAACTTGGTCT  
GACAGTTACCAATGCTTAATCAGTGAGGCACCTATCTCAGCGATCTGTCTATTTTCGTTTCATCCATAGTTGCCTGACT  
CCCCGCTCGTGTAGATAACTACGATACGGGAGGGCTTACCATCTGGCCCCAGTGTGCAATGATACCGCGAGACCCAC  
GCTCACCGCTCCAGATTTATCAGCAATAAACCAGCCAGCCGGAAGGGCCGAGCGCAGAAGTGGTCCTGCAACTTTA  
TCCGCTCCATCCAGTCTATTAATTGTTGCCGGGAAGCTAGAGTAAGTAGTTCGCCAGTTAATAGTTTTGCGCAACGT  
TGTTGCCATTGCTACAGGCATCGTGGTGTACGCTCGTCGTTTGGTATGGCTTCATTACAGCTCCGGTCCCAACGAT  
CAAGGCGAGTTACATGATCCCCATGTTGTGCAAAAAAGCGGTTAGCTCCTTCGGTCCCTCCGATCGTTGTGAGAAGT  
AAGTTGGCCGAGTGTATCACTCATGGTTATGGCAGCACTGCATAATTCTCTTACTGTATGCCATCCGTAAGATG  
CTTTTCTGTGACTGGTGTGACTCAACCAAGTCATTCTGAGAATAGTGTATGCGGCGACCGAGTTGCTCTTGCCCGG  
CGTCAATACGGGATAATACCGCGCCACATAGCAGAACTTTAAAGTGTCTCATCATTGAAAACGTTCTTCCGGGGCGA  
AAACTCTCAAGGATCTTACCGCTGTTGAGATCCAGTTTCGATGTAACCCACTCGTGCACCCAACTGATCTTCAGCATC  
TTTTACTTTACCAGCGTTTTCTGGGTGAGCAAAAAACAGGAAGGCAAAAATGCCGCAAAAAAGGGAATAAGGGCGACAC  
GGAAATGTTGAATACTCATACTCTTCTTTTTCAATATTATTGAAGCATTATCAGGGTTATTGTCTCATGAGCGGA  
TACATATTTGAATGTATTTAGAAAAATAACAAATAGGGGTTCCGCGCACATTTCCCCGAAAAGTGCCACCTGACGT  
C

MAHHHHHMRLFVSEGPSLPLVLAARARGRAELLI STVGPEECVVPFLTRPKVPVLQLDSGNYLFSASAICRYF  
FLLCGWEQDDLTNQWLEWEATELQPVLSAALHCLVVQKKGEDILGPLRRVLTHIDHLSLRQNCPLFAGDTESLADI  
VLWGALYPLLQDPAYLPEELGALQSWFQTLSTQEPQRAAETVLKQQVLAALRLYLQKQPQPQPPPEGRTVSNELE  
EEELATLSEEDIVTAVAWEKGLLESLPPLKQQHPVLPVPGERNVLTISAPPYVNNVPHLGNIIIGCVLSADV FARYC  
RLRQWNTLYLCGTDEYGTATETKAMEEGLTPREICDKYHAIHADIYRWFGISFDTFGRTTTPQQTKITQDIFQRLLT  
RGFVLRDTEQLRCERCARFLADRFEVGVPCFCGYEEARGDQCDRCGLINAIELKPKQCKICRSCPVRSSQHLFL  
DLPKLEKRLDNLGKTVPGSDWTPNARFIIRSWLRDGLKPRCITRDLKWGTPVPLEGFEDKVFYVWFDATIGLVSIT  
ANYTDQWEKWWKNPEQVDLYQFMAKDNVPFLGLVPCSVLGAEDNYTLVKHIIATEYLNIEDGKFSKSRGIGVFGDM  
AKDTGIPADIWRFYLLYIRPEGQDSAFSWTDLIKNNSELLNNGFNINRAGMFVSKFFGGCVPEMALT PDDRRLVA  
HVSWELOHYHQLEKVRIRDALRSILTISRHNQYIQVNEPWKRIKGGEMDRQRAGTVMGAVNMAALLSVMLQPYM

PTVSSSTIQTLQLPPAACRILATSFICTLPAGHRIGTVSPLFQKLENDQIENLRQRFGGGQAKGSPKPAAVEAVTAA  
 GSQHIQTLTDEVTKQGNVVRELKAQKADKNQVAEVAKLLDLKKQLALAEKPIETPKGKKKK--

**Figure S5. The pMarsCLL\_G vector for expression of CLL-MmMetRS under CMV promoter control.** Restriction enzymes are highlighted in yellow and the enzyme coding sequence is highlighted in green. Kozak sequence is highlighted in blue. The expressed protein sequence is included after the plasmid sequence.

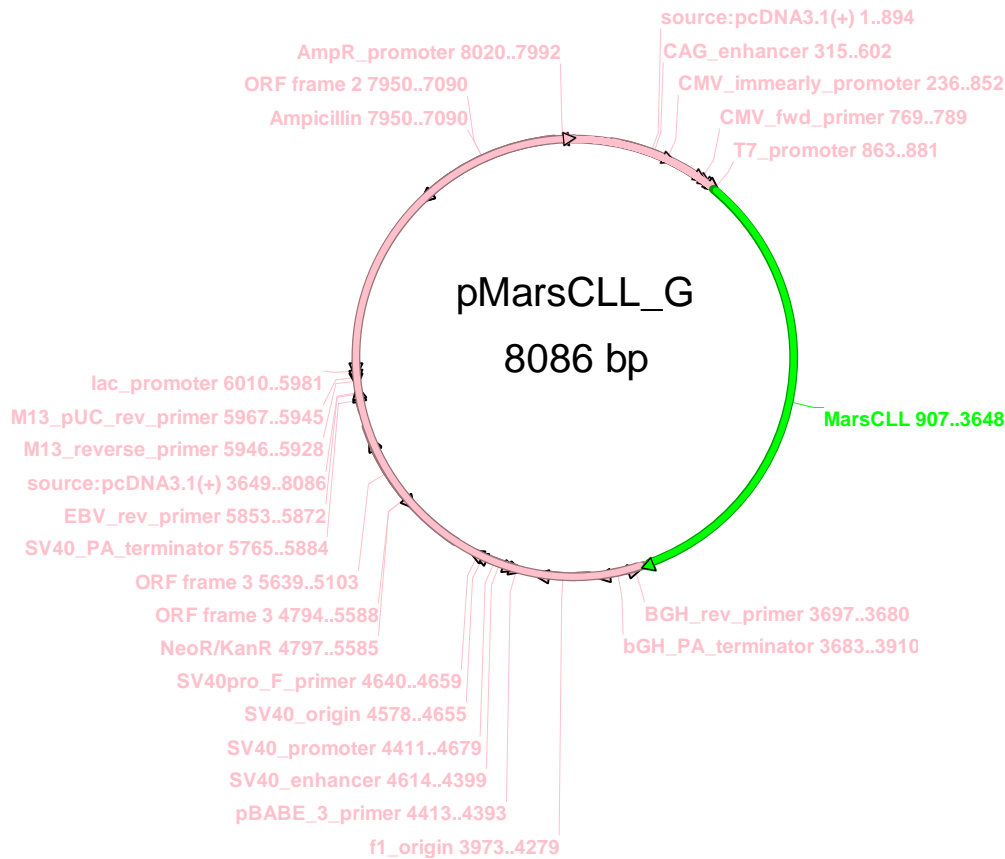

GACGGATCGGGAGATCTCCCGATCCCCTATGGTGCACCTCTCAGTACAATCTGCTCTGATGCCGCATAGTTAAGCCAG  
 TATCTGCTCCCTGCTTGTGTGTTGGAGGTCGCTGAGTAGTGCGCGAGCAAAATTTAAGCTACAACAAGGCAAGGCTT  
 GACCGACAATTGCATGAAGAATCTGCTTAGGGTTAGGCGTTTTGCGCTGCTTCGCGATGTACGGGCCAGATATACGC  
 GTTGACATTGATTATTGACTAGTTATTAATAGTAATCAATTACGGGGTCATTAGTTTCATAGCCCATATATGGAGTTC  
 CGCGTTACATAACTTACGGTAAATGGCCCGCCTGGCTGACCGCCCAACGACCCCCGCCATTGACGTCAATAATGAC  
 GTATGTTCCCATAGTAACGCCAATAGGGACTTTCCATTGACGTCAATGGGTGGAGTATTTACGGTAAACTGCCCACT  
 TGGCAGTACATCAAGTGTATCATATGCCAAGTACGCCCCCTATTGACGTCAATGACGGTAAATGGCCCGCCTGGCAT  
 TATGCCAGTACATGACCTTATGGGACTTTCTACTTGGCAGTACATCTACGTATTAGTCATCGCTATTACCATGGT  
 GATGCGGTTTTGGCAGTACATCAATGGGCGTGGATAGCGGTTTTGACTCACGGGGATTTCCAAGTCTCCACCCCATTG  
 ACGTCAATGGGAGTTTTGTTTTGGCACAAAATCAACGGGACTTTCCAAAATGTCGTAACAACCTCCGCCCATTTGACG  
 CAAATGGGCGGTAGGCGTGTACGGTGGGAGGTCTATATAAGCAGAGCTCTCTGGCTAACTAGAGAACCCTGCTTA  
 CTGGCTTATCGAAATTAATACGACTCACTATAGGGAGACCCAAGCTGGCTAGC**GCCACC**ATGGCCACCATCACCAT  
 CACCAT**ATGAGACTGTTTCGTGAGCGAGGGTTCCCCGGGGAGCCTGCCCGTGTGGCTGCGGCCGCGAGGGCCCCGGGG**  
**TCGGGCGGAGCTGCTCATCAGCACCGTAGGCCCGAAGAGTGTGTGGTACCATTCTTACCCGGCCTAAGGTCCCTG**  
**TCTTGCAGCTGGATAGTGGAACCTACCTCTTCTCTGCTAGTGCAATCTGCCGATATTTTTTCTGTTATGTGGCTGG**

GAACAAGATGATCTCACCAACCAGTGGCTGGAATGGGAGGCAACAGAAGTGCAGCCAGTTCTGTCTGCTGCCCTACA  
CTGTCTAGTGGTTCAAGGCAAGAAAGGGGAAGATATACTTGGCCCACTTCGGAGAGTCCTGACTCACATTGATCACA  
GCTTGAGTCGTCAAAACTGTCTTTTCTGGCTGGGGACACAGAATCTCTAGCTGACATTGTTTTGTGGGGAGCACTG  
TATCCTTTACTGCAAGACCCAGCTTACCTCCCTGAGGAGTTGGGTGCCCTGCAAAGTTGGTTCCAGACACTGAGTAC  
CCAGGAACCGTGTGAGCGAGCTGCAGAGACGGTGTCTAAAACAGCAGGGTGTCTGGCACTTCGTCTGTACCTCCAGA  
AACAGCCACAGCCTCAGCCCCGCCTCCTGAGGGGAGAAGTGTGAGCAACGAGCTGGAGGAAGAGGAACTGGCTACC  
TTGTCTGAGGAGGACATCGTTACAGCTGTTGCCGCGTGGGAGAAGGGTCTGGAAAGCCTGCCTCCGCTAAAGCTCCA  
GCAGCATCCAGTGTTCCTGTGCCTGGAGAGAGGAATGTTCTCATCACCAGTGCCTGTCCCTATGTCAACAATGTCC  
CCCACCTTGGAAACATCATTGGCTGTGTGCTCAGTGTGATGTTTGGCAAGGTATTGTGCCTTCGCCAGTGGAAAT  
ACCCTCTATCTGTGTGGTACAGATGAGTATGGTACTGCGACAGAGACCAAGGCCATGGAGGAGGGCCTAACCCACG  
GGAAATCTGTGACAAGTACCATGCCATCCATGCTGACATCTACCCTGGTTTCGGCATATCGTTTCGATACTTTCGGGC  
GCACTACCACTCCTCAGCAGACCAAAATCACCCAGGACATCTCCAGAGGTTGCTGACCCGGGGGTTTTGTGCTGCGA  
GATACTGTGGAGCAGCTTCGGTGTGAGCGGTGTGCACGTTTCTGGCTGACCGCTTTGTGGAGGGTGTGTGTCCCTT  
CTGTGGCTATGAAGAGGCCCGAGGTGACCAGTGTGACAGGTGTGGCAAGCTCATCAATGCCATTGAGCTCAAGAAAC  
CACAGTGCAAAATCTGCCGCTCCTGCCCTGTGGTGGAGTCTCACAGCACCTGTTTCTAGACTTGCCTAAGTTGGAA  
AAGCGTCTGGAGGACTGGTTGGGGAAGACAGTGCCTGGCAGTACTGGACACCCAATGCCAGGTTTATTATACGTTT  
CTGGCTTCGAGATGGCCTCAAGCCACGATGCATCACCAGAGACCTCAAATGGGGAACGCCTGTGCCCTTGAAGGTT  
TTGAGGACAAGGTATTTTACGTCTGGTTTGATGCTACTATTGGCCTGGTGTCCATCACAGCCAACTACACAGACCAA  
TGGGAGAAATGGTGGAAAGAACCCAGAACAAGTGGACCTTACCAGTTCATGGCCAAAGACAATGTTCCCTTCCTGGG  
CTTGGTCTTTCCGTGTTTTCAGTCTTAGGAGCTGAGGACAACCTACACCCTGGTCAAGCACATCATTGCTACAGAGTACC  
TGAACTATGAGGATGGGAAATTTCTTAAGAGCCGGGGCATAGGAGTGTGGGAGACATGGCCAAGGATACAGGAATC  
CCTGCTGACATCTGGCGATTCTATCTGCTATAACATTCCGGCCTGAGGGCCAGGACAGTGCCTTCTCCTGGACAGACTT  
GTTGATTAAAAACAATTTCTGAGCTGCTCAACAACCTGGGCAACTTCATCAACAGAGCTGGCATGTTTGTCTTAAGT  
TTTTTGGCGGTTGTGTGCCTGAGATGGCGCTAACCCTGATGACAGACGCCTGGTGGCCCATGTCTCTTGGGAACTC  
CAGCACTATCACCAGCTGTTGGAAAAGGTTCCGGATCCGGGATGCCTTGCAGATATCCTCACCATATCTCGCCATGG  
CAACCAATACATTCAAGTGAATGAGCCCTGGAAACGGATTAAAGGTGGTGGAGATGGACAGGCAGCGGGCAGGCACAG  
TGACAGGCATGGCAGTGAACATGGCTGCCTTGCTGTCTGTGATGCTGCAGCCATACATGCCACAGTCACTTACC  
ATCCAGACCCAGCTGCAGCTCCACCTGCAGCCTGCCGATCCTTGCCACAAGCTTCATTTGTACCTTGCAGCAGG  
CCACCGAATTGGCACAGTCACTCCTTTGTTCCAAAAGTGGAAAATGACCAGATTGAAAATTTGAGGCAGCGCTTTG  
GAGGGGGTCAGGCTAAAGGCTCCCCAAGCCAGCAGCTGTGGAGGCAGTTACAGCAGCAGGCTCGCAGCACATACAA  
ACGCTGACGGATGAGGTGACCAAGCAGGGCAACGTCGTCCGGGAACTGAAAGCACAGAAGGCAGACAAGAACCAGGT  
TGCTGCAGAGGTGGCTAAACTCTTGGATCTAAAGAAACAGTTGGCTTTGGCTGAGGGGAAACCCATTGAAACTCCTA  
AAGGCAAGAAGAAAAAGTGATAA

CTCGAGTCTAGAGGGCCCGTTTAAACCCGCTGATCAGCCTCGACTGTGCCTTCT  
AGTTGCCAGCCATCTGTTGTTTGGCCCTCCCCCGTGCCTTCCCTTGACCCTGGAAGGTGCCACTCCCCTGTCCCTTTC  
CTAATAAAATGAGGAAATTCATCGCATTGTCTGAGTAGGTGTCACTTCTATTCTGGGGGGTGGGGTGGGGCAGGACA  
GCAAGGGGGGAGGATTGGGAAGACAATAGCAGGCATGCTGGGGATGCGGTGGGCTCTATGGCTTCTGAGGCGGAAAGA  
ACCAGCTGGGGCTCTAGGGGGTATCCCCACGCGCCCTGTAGCGGCGCATTAAAGCGCGGGGGTGTGGTGGTTACGCG  
CAGCGTGACCGCTACACTTGCCAGCGCCCTAGCGCCCGCTCCTTTGCTTTCTTCCCTTCCCTTCTCGCCACGTTTCG  
CCGGCTTTCCCGTCAAGCTCTAAATCGGGGGCTCCCTTTAGGGTCCGATTTAGTGCTTTACGGCACCTCGACCCC  
AAAAAAGTTGATTAGGGTGTGTTTACGTTAGTGGGCCATCGCCCTGATAGACGGTTTTTTCGCCCTTTGACGTTGGA  
GTCCACGTTCTTTAATAGTGGACTCTTGTTCAAAAGTGGAAACAACACTCAACCCTATCTCGGTCTATTCTTTTATT  
TATAAGGGATTTTGGCGATTTCCGGCTATTGGTTAAAAAATGAGCTGATTTAACAAAAATTTAACGCGAATTAATTC  
TGTGGAATGTGTGTCAGTTAGGGTGTGGAAAGTCCCCAGGCTCCCCAGCAGGCAGAAGTATGCAAAGCATGCATCTC  
AATTAGTCAGCAACCAGGTGTGGAAAGTCCCCAGGCTCCCCAGCAGGCAGAAGTATGCAAAGCATGCATCTCAATTA  
GTCAGCAACCATAGTCCC GCCCTAACTCCGCCATCCCCGCCCTAACTCCGCCAGTTCCGCCATTCTCCGCC  
ATGGCTGACTAATTTTTTTTTATTTATGCAGAGGCCGAGGCCGCTCTGCCTCTGAGCTATTCCAGAAGTAGTGAGGA  
GGCTTTTTTGGAGGCCTAGGCTTTTGCAAAAGCTCCCGGGAGCTTGTATATCCATTTTCGGATCTGATCAAGAGAC  
AGGATGAGGATCGTTTTCGATGATTGAACAAGATGGATTGCACGCAGGTTCTCCGGCCGCTTGGGTGGAGAGGCTAT  
TCGGCTATGACTGGGCACAACAGACAATCGGCTGCTCTGATGCCGCCGTGTTCCGGCTGTGAGCGCAGGGGCGCCCG

GTTCTTTTTGTCAAGACCGACCTGTCCGGTGCCCTGAATGAACTGCAGGACGAGGCAGCGCGGCTATCGTGGCTGGC  
CACGACGGGCGTTTCTTGGCGAGCTGTGCTCGACGTTGTCACTGAAGCGGGAAGGGACTGGCTGCTATTGGGCGAAG  
TGCCGGGGCAGGATCTCCTGTCTACCTTGTCTCCTGCCGAGAAAGTATCCATCATGGCTGATGCAATGCGGCGG  
CTGCATACGCTTGATCCGGCTACCTGCCATTTCGACCACCAAGCGAAACATCGCATCGAGCGAGCAGTACTCGGAT  
GGAAGCCGGTCTTGTGATCAGGATGATCTGGACGAAGAGCATCAGGGGCTCGCGCCAGCCGAACTGTTCCGCCAGGC  
TCAAGGCGCGCATGCCCGACGGCGAGGATCTCGTCGTGACCCATGGCGATGCCTGCTTGGCGAATATCATGGTGGAA  
AATGGCCGCTTTTTCTGGATTTCATCGACTGTGGCCGGCTGGGTGTGGCGGACCCTATCAGGACATAGCGTTGGCTAC  
CCGTGATATTGCTGAAGAGCTTGGCGGCGAATGGGCTGACCGCTTCTCGTGCTTTACGGTATCGCCGCTCCCGATT  
CGCAGCGCATCGCCTTCTATCGCCTTCTTGACGAGTTCTTCTGAGCGGGACTCTGGGGTTCGAAATGACCGACCAAG  
CGACGCCAACCTGCCATCACGAGATTTGATTCCACCGCCGCTTCTATGAAAGGTTGGGCTTCGGAATCGTTTTTC  
CGGGACGCCGGCTGGATGATCCTCCAGCGCGGGGATCTCATGCTGGAGTTCTTCGCCCACCCCAACTTGTTTTATTGC  
AGCTTATAATGGTTACAAATAAAGCAATAGCATCACAAATTTACAAATAAAGCATTTTTTTTTACTGCATTCTAGTT  
GTGGTTTTGTCCAAACTCATCAATGTATCTTATCATGTCTGTATACCGTCGACCTCTAGCTAGAGCTTGGCGTAATCA  
TGGTCATAGCTGTTTTCTGTGTGAAATTGTTATCCGCTCACAATTCACACAACATACGAGCCGGAAGCATAAAGTG  
TAAAGCCTGGGGTGCCTAATGAGTGAGCTAACTCACATTAATTGCGTTGCGCTCACTGCCCGCTTTCAGTCGGGAA  
ACCTGTGTCGCCAGCTGCATTAATGAATCGGCCAACCGCGGGGAGAGGCGGTTTTGCGTATTGGGCGCTCTTCCGCT  
TCCTCGCTCACTGACTCGCTGCGCTCGGTCTTGGCTGCGGCGAGCGGTATCAGCTCAAAAGGCGGTAATACG  
GTTATCCACAGAATCAGGGGATAACGCAGGAAAGAACATGTGAGCAAAAGGCCAGCAAAAGGCCAGGAACCGTAAAA  
AGGCCGCGTTGCTGGCGTTTTTCCATAGGCTCCGCCCCCTGACGAGCATCACAAAAATCGACGCTCAAGTCAGAGG  
TGGCGAAACCCGACAGGACTATAAAGATACCAGGCGTTTTCCCCCTGGAAGCTCCCTCGTGCGCTCTCCTGTTCCGAC  
CCTGCCGCTTACCGGATACCTGTCCGCTTTTCTCCCTTCGGGAAGCGTGGCGCTTTTCTCATAGCTCACGCTGTAGGT  
ATCTCAGTTCCGGTGTAGGTGTTCCGCTCCAAGCTGGGCTGTGTGCACGAACCCCCCGTTTCCAGCCGACCGCTGCGCC  
TTATCCGGTAACTATCGTCTTGAGTCCAACCCGGTAAGACACGACTTATCGCCACTGGCAGCAGCCACTGGTAACAG  
GATTAGCAGAGCGAGGTATGTAGGCGGTGCTACAGAGTTCTTGAAGTGGTGGCCTAACTACGGCTACACTAGAAGAA  
CAGTATTTGGTATCTGCGCTCTGCTGAAGCCAGTTACCTTCGGAAAAAGAGTTGGTAGCTCTTGATCCGGCAAACAA  
ACCACCGCTGGTAGCGGTTTTTTTTGTTTGAAGCAGCAGATTACGCGCAGAAAAAAGGATCTCAAGAAGATCCTTT  
GATCTTTTTCTACGGGTCTGACGCTCAGTGAACGAAAACCTCACGTTAAGGGATTTTTGGTCATGAGATTATCAAAAA  
GGATCTTACCTAGATCCTTTTTAAATTAATAAATGAAGTTTTAAATCAATCTAAAGTATATATGAGTAAACTTGGTCT  
GACAGTTACCAATGCTTAATCAGTGAGGCACCTATCTCAGCGATCTGTCTATTTTCGTTTCCATAGTTGCCTGACT  
CCCCGTGCTGTAGATAACTACGATACGGGAGGGCTTACCATCTGGCCCCAGTGTGCAATGATACCGCGAGACCCAC  
GCTCACCGGCTCCAGATTTATCAGCAATAAACCAGCCAGCCGGAAGGGCCGAGCGCAGAAGTGGTCTGCAACTTTA  
TCCGCTCCATCCAGTCTATTAATTGTTGCCGGGAAGCTAGAGTAAGTAGTTCCGCCAGTTAATAGTTTGGCGAACGT  
TGTTGCCATTGCTACAGGCATCGTGGTGTACGCTCGTCTGTTGGTATGGCTTCATTCAGCTCCGGTTCCCAACGAT  
CAAGGCGAGTTACATGATCCCCATGTTGTGCAAAAAAGCGGTTAGCTCCTTCGGTCTCCGATCGTTGTGAGAAGT  
AAGTTGGCCGCGAGTGTATCACTCATGGTTATGGCAGCACTGCATAATTCTTACTGTGATGCCATCCGTAAGATG  
CTTTTCTGTGACTGGTGAAGTACTCAACCAAGTCATTCTGAGAATAGTGTATGCGGCGACCGAGTTGCTCTTGGCCGG  
CGTCAATACGGGATAATACCGCGCCACATAGCAGAACTTTAAAAGTGTCTCATATTGGAACCGTTCTTCCGGGGCGA  
AAACTCTCAAGGATCTTACCGCTGTTGAGATCCAGTTCGATGTAACCCACTCGTGCACCCAACTGATCTTCAGCATC  
TTTTACTTTACCAGCGTTTTCTGGGTGAGCAAAAAACAGGAAGGCAAAATGCCGCAAAAAAGGGAATAAGGGCGACAC  
GGAAATGTTGAATACTCATACTCTTCTTTTTCAATATTATTGAAGCATTATCAGGGTTATTGTCTCATGAGCGGA  
TACATATTTGAATGTATTTAGAAAAATAACAAATAGGGGTTCCGCGCACATTTCCCCGAAAAGTGCCACCTGACGT  
C

MAHHHHHMRLFVSEGPSGLPVLAAAARARGRAELLI STVGPEECVVPFLTRPKVPVLQLDSGNYLFSASAICRYF  
FLLCGWEQDDL TNQWLEWEATELQPVLSAALHCLVVQKKGEDILGPLRRVLTHIDHLSRQNC PFLAGDTE SLADI  
VLWGALYPLLQDPAYLPEELGALQSWFQTLSTQEPQRAAETVLKQQGV LALRLYLQKQPQPQPPPEGRTVSNELE  
EEELATLSEEDIVTAVAWEKGLLESLPPLKLQQHPVLPVPGERNV LITSACPYVNNVPHLGNI IGCVL SADVFARYC  
RLRQWNTLYLCGTDEYGTATETKAMEEGLTPREICDKYHAIHADIYRWFGISFDTFGRTTTTPQQT KITQDIFQRLLT  
RGFVLRD TVEQLRCERCARFLADRFVEGVCPFCGYEEARGDQCDRCGLINAIELKKPQCKICRSCPVRSSQHFLFL  
DLPKLEKRLEDWLGKTVPGSDWTPNARFI IRSWLRDGLKPRCITRDLKWGTPVPLEGFEDKVFYVWFDATIGLVSIT  
ANYTDQWEKWWKNPEQVDLYQFMAKDNVPFLGLVFPCSV LGAEDNYTLVKHI IATEYLNIEDGKFSKSRGIGVFGDM

AKDTGIPADIWRFYLLYIRPEGQDSAFSWTDLLIKNNSELLNNGFNINRAGMFVSKFFGGCVPEMALTTPDDRRLVA  
HVSWELOHYHQLLEKVRIRDALRSILTISRHNQYIQVNEPWKRIRKGGEMDRQRAGTVTGMVAVNMAALLSVMLQPYM  
PTVSSSTIQTQLQLPPAACRILATSFICTLPAGHRIGTVSPLFQKLENDQIENLRQRFGGGQAKGSPKPAAVEAVTAA  
GSQHIQTTLTDEVTKQGNVVRELKAQKADKNQVAAEVAKLLDLKKQLALAEKPIETPKGKKKK--

**Figure S6. The pMarsNLL\_G vector for expression of NLL-MmMetRS under CMV promoter control.** Restriction enzymes are highlighted in yellow and the enzyme coding sequence is highlighted in green. Kozak sequence is highlighted in blue. The expressed protein sequence is included after the plasmid sequence.

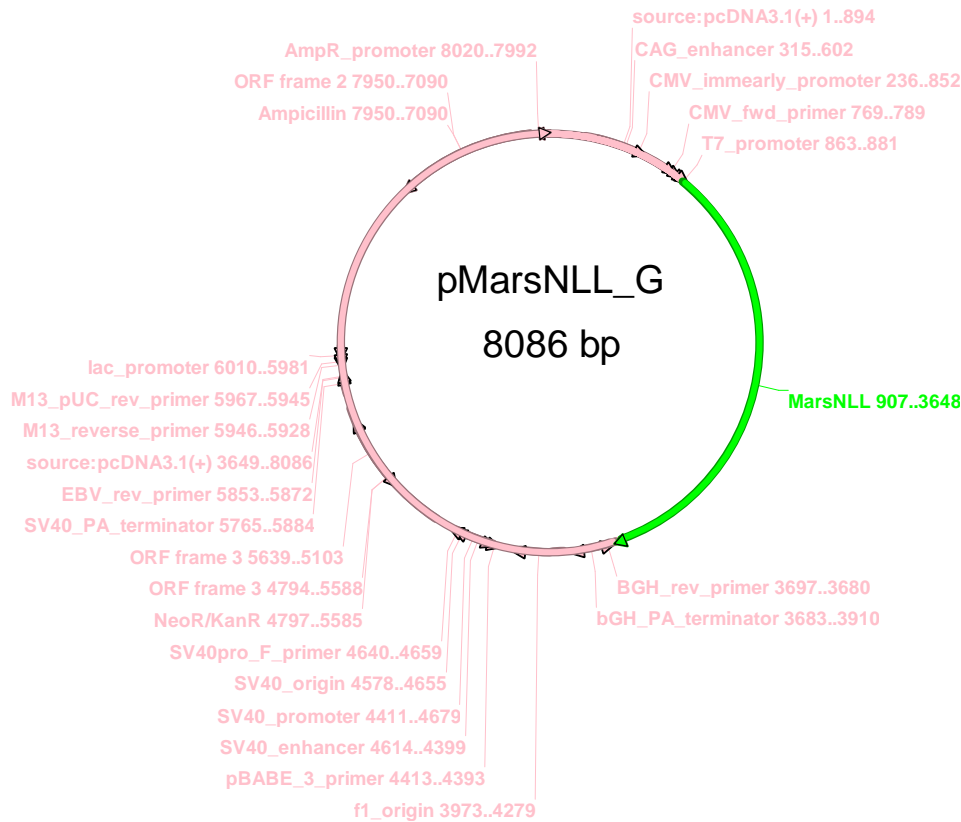

GACGGATCGGGAGATCTCCCAGATCCCCTATGGTGCACCTCTCAGTACAATCTGCTCTGATGCCGCATAGTTAAGCCAG  
TATCTGCTCCCTGCTTGTGTGTTGGAGGTCGCTGAGTAGTGCGCGAGCAAAATTTAAGCTACAACAAGGCAAGGCTT  
GACCGACAATTGCATGAAGAATCTGCTTAGGGTTAGGCGTTTTGCGCTGCTTCGCGATGTACGGGCCAGATATACGC  
GTTGACATTGATTATTGACTAGTTATTAATAGTAATCAATTACGGGGTCATTAGTTCATAGCCCATATATGGAGTTC  
CGCGTTACATAACTTACGGTAAATGGCCCGCCTGGCTGACCGCCCAACGACCCCGCCATTGACGTCAATAATGAC  
GTATGTTCCCATAGTAACGCCAATAGGGACTTTCCATTGACGTCAATGGGTGGAGTATTTACGGTAAACTGCCCACT  
TGGCAGTACATCAAGTGTATCATATGCCAAGTACGCCCCCTATTGACGTCAATGACGGTAAATGGCCCGCCTGGCAT  
TATGCCCAGTACATGACCTTATGGGACTTTCTACTTGGCAGTACATCTACGTATTAGTCATCGCTATTACCATGGT  
GATGCGGTTTTGGCAGTACATCAATGGGCGTGGATAGCGGTTTTGACTCACGGGGATTTCCAAGTCTCCACCCATTG  
ACGTCAATGGGAGTTTTGTTTTGGCACCAAAATCAACGGGACTTTCCAAAATGTCGTAACAACCTCCGCCCCATTGACG  
CAAATGGGCGGTAGGCGTGTACGGTGGGAGGTCTATATAAGCAGAGCTCTCTGGCTAACTAGAGAACCCACTGCTTA  
CTGGCTTATCGAAATTAATACGACTCACTATAGGGAGACCCAAGCTGGCTAGCGCCACCATGCCCCACCATCACCAT  
CACCATATGAGACTGTTTCGTGAGCGAGGGTTCCCCGGGGAGCCTGCCCGTGGCTGGCTGCGGCCGCGAGGGCCCCGGG  
TCGGGCGGAGCTGCTCATCAGCACCGTAGGCCCCGAAGAGTGTGTGGTACCATTCTTACCCGGCCTAAGGTCCCTG



TCTTGCAGCTGGATAGTGGCAACTACCTCTTCTCTGCTAGTGCAATCTGCCGATATTTTTTCTGTTATGTGGCTGG  
GAACAAGATGATCTCACCAACCAGTGGCTGGAATGGGAGGCAACAGAAGTGCAGCCAGTTCTGTCTGCTGCCCTACA  
CTGTCTAGTGGTTCAAGGCAAGAAAGGGGAAGATATACTTGGCCCACTTCGGAGAGTCCTGACTCACATTGATCACA  
GCTTGAGTCGTCAAAACTGTCCTTTTCTGGCTGGGGACACAGAATCTCTAGCTGACATTGTTTTGTGGGGAGCACTG  
TATCCTTTACTGCAAGACCCAGCTTACCTCCCTGAGGAGTTGGGTGCCCTGCAAAGTTGGTTCAGACACTGAGTAC  
CCAGGAACCGTGTGAGCGAGCTGCAGAGACGGTGCTAAAACAGCAGGGTGTCTGGCACTTCGTCTGTACCTCCAGA  
AACAGCCACAGCCTCAGCCCCCGCCTCCTGAGGGGAGAAGTGTGAGCAACGAGCTGGAGGAAGAGGAAGTGGCTACC  
TTGTCTGAGGAGGACATCGTTACAGCTGTTGCCGCGTGGGAGAAGGGTCTGGAAAGCCTGCCTCCGCTAAAGCTCCA  
GCAGCATCCAGTGTGCTGTGCTGAGAGAGGAATGTTCTCATCACCAGTGCCAACCCCTATGTCAACAATGTCC  
CCCACCTTGGAAACATCATTGGCTGTGTGCTCAGTGCTGATGTCTTTGCAAGGTATTGTGCGCTTCGCCAGTGGAA  
ACCCTCTATCTGTGTGGTACAGATGAGTATGGTACTGCGACAGAGACCAAGGCCATGGAGGAGGGCCTAACCCACG  
GGAAATCTGTGACAAGTACCATGCCATCCATGCTGACATCTACCCTGGTTCGGCATATCGTTCGATACTTTCGGGC  
GCACTACCACTCCTCAGCAGACCAAAATCACCCAGGACATCTCCAGAGGTTGCTGACCCGGGGGTTTGTGCTGCGA  
GATACTGTGGAGCAGCTTCGGTGTGAGCGGTGTGCACGTTTCTGGCTGACCGCTTTGTGGAGGGTGTGTGTCCCTT  
CTGTGGCTATGAAGAGGCCCGAGGTGACCAGTGTGACAGGTGTGGCAAGCTCATCAATGCCATTGAGCTCAAGAAAC  
CACAGTGCAAAATCTGCCGCTCCTGCCCTGTGGTGGAGTCTCACAGCACCTGTTTCTAGACTTGCCTAAGTTGGAA  
AAGCGTCTGGAGGACTGGTTGGGAAGACAGTGCCTGGCAGTACTGGACACCCAATGCCAGTTTATTATACGTTT  
CTGGCTTCGAGATGGCCTCAAGCCACGATGCATCACCAGAGACCTCAAATGGGGAACGCCTGTGCCCTTGAAGGTT  
TTGAGGACAAGGTATTTTACGTCTGGTTTGTGCTACTATTGGCCTGGTGTCCATCACAGCCAATACACAGACCA  
TGGGAGAAATGGTGAAGAACCAGAACAGTGGACCTTTACCAGTTCATGGCCAAAGACAATGTTCCCTTCTGGG  
CTTGGTCTTTCCGTGTTTACGTCTTAGGAGCTGAGGACAACCTACACCCTGGTCAAGCACATCATTGCTACAGAGTACC  
TGAACTATGAGGATGGGAAATTTCTTAAGAGCCGGGGCATAGGAGTGTGGGAGACATGGCCAAGGATACAGGAATC  
CCTGCTGACATCTGGCGATTCTATCTGCTATAACATTCGGCCTGAGGGCCAGGACAGTGCCTTCTCCTGGACAGACTT  
GTTGATTAACAAACAATTCTGAGCTGCTCAACAACCTGGGCAACTTCATCAACAGAGCTGGCATGTTTGTCTTAAGT  
TTTTTGGCGGTTGTGTGCCTGAGATGGCGCTAACCCCTGATGACAGACGCCTGGTGGCCCATGTCTCTTGGGAACCTC  
CAGCACTATCACCAGCTGTTGGAAAAGGTTTCGGATCCGGGATGCCTTGCAGCATCTCACCATATCTCGCCATGG  
CAACCAATACATTCAAGTGAATGAGCCCTGGAAACGGATTAAAGGTGGTGAATGGACAGGCAGCGGGCAGGCACAG  
TGACAGGCATGGCAGTGAACATGGCTGCCTTGTGCTGTGCTGATGCTGCAGCCATACATGCCACAGTCAGCTCTACC  
ATCCAGACCCAGCTGCAGCTCCACCTGCAGCCTGCCGATCCTTGCCACAAGCTTCATTTGTACCTTGGCAGCAGG  
CCACCGAATTGGCACAGTCAGTCCTTTGTTCCAAAACCTGGAAAATGACCAGATTGAAAATTTGAGGCAGCGCTTTG  
GAGGGGGTTCAGGCTAAAGGCTCCCCAAGCCAGCAGCTGTGGAGGCAGTTACAGCAGCAGGCTCGCAGCACATACAA  
ACGCTGACGGATGAGGTGACCAAGCAGGGCAACGTCGTCCGGGAAGTGAAGCACAGAAGGCAGACAAGAACCAGGT  
TGCTGCAGAGGTGGCTAAACTCTTGGATCTAAAGAAACAGTTGGCTTTGGCTGAGGGGAAACCCATTGAAACTCCTA  
AAGGCAAGAAGAAAAAGTGATAA

CTCGAGTCTAGAGGGCCCGTTTTAAACCCGCTGATCAGCCTCGACTGTGCCTTCT  
AGTTGCCAGCCATCTGTTGTTTGGCCCTCCCCCGTGCCTTCCCTTGACCCTGGAAGGTGCCACTCCCCTGTCTTTT  
CTAATAAAATGAGGAAATTGCATCGCATTGTCTGAGTAGGTGTCATTCTATTCTGGGGGTGGGGTGGGGCAGGACA  
GCAAGGGGGAGGATTGGGAAGACAATAGCAGGCATGCTGGGGATGCGGTGGGCTCTATGGCTTCTGAGGCGGAAAGA  
ACCAGCTGGGGCTCTAGGGGGTATCCCCACGCGCCCTGTAGCGGCGCATTAAAGCGCGGGGGTGTGGTGGTTACGCG  
CAGCGTGACCGCTACACTTGCCAGCGCCCTAGCGCCCGCTCCTTTGCTTTTCTTCCCTTCTTCTCGCCACGTTTCG  
CCGGCTTTCCCGTCAAGCTCTAAATCGGGGGCTCCCTTTAGGGTTCGGATTTAGTGCTTTACGGCACCTCGACCC  
AAAAAAGTTGATTAGGGTGTGTTTACGCTAGTGGGCCATCGCCCTGATAGACGGTTTTTTCGCCCTTTGACGTTGGA  
GTCCACGTTCTTTAATAGTGGACTCTTGTTCAAAACCTGGAACAACACTCAACCCTATCTCGGTCTATTCTTTTATT  
TATAAGGGATTTTGGCGATTTGGCCCTATTGGTTAAAAAATGAGCTGATTTAACAAAAATTTAACGCGAATTAATTC  
TGTGGAATGTGTGTCAGTTAGGGTGTGGAAAGTCCCCAGGCTCCCCAGCAGGCAGAAGTATGCAAAGCATGCATCTC  
AATTAGTCAGCAACCAGGTGTGGAAAGTCCCCAGGCTCCCCAGCAGGCAGAAGTATGCAAAGCATGCATCTCAATTA  
GTCAGCAACCATAGTCCCAGCCCTAACTCCGCCCCTAACCTCCGCCCAGTTCCGCCCATTCTCCGCCCC  
ATGGCTGACTAATTTTTTTTTATTTATGCAGAGGCCGAGGCCGCTCTGCCTCTGAGCTATTCCAGAAGTAGTGAGGA  
GGCTTTTTTGGAGGCCTAGGCTTTTGCAAAAGCTCCCGGGAGCTTGTATATCCATTTTCGGATCTGATCAAGAGAC  
AGGATGAGGATCGTTTTCGCATGATTGAACAAGATGGATTGCACGCAGGTTCTCCGGCCGCTTGGGTGGAGAGGCTAT

TCGGCTATGACTGGGCACAACAGACAATCGGCTGCTCTGATGCCGCGGTGTTCCGGCTGTCAGCGCAGGGGCGCCCG  
GTTCTTTTTTGTCAAGACCGACCTGTCCGGTGCCCTGAATGAACTGCAGGACGAGGCAGCGCGGCTATCGTGGCTGGC  
CACGACGGGCGTTTCTTGGCGAGCTGTGCTCGACGTTGTACTGAAGCGGGAAGGGACTGGCTGCTATTGGGCGAAG  
TGCCGGGGCAGGATCTCCTGTCATCTCACCTTGCTCCTGCCGAGAAAGTATCCATCATGGCTGATGCAATGCGGCGG  
CTGCATACGCTTGATCCGGCTACCTGCCATTGACCACCAAGCGAAACATCGCATCGAGCGAGCACGTACTIONCGGAT  
GGAAGCCGGTCTTGTGATCAGGATGATCTGGACGAAGAGCATCAGGGGCTCGCGCCAGCCGAACTGTTCCGCCAGGC  
TCAAGGCGCGCATGCCCCAGGGCGAGGATCTCGTCGTGACCCATGGCGATGCCTGCTTGCCGAATATCATGGTGGAA  
AATGGCCGCTTTTTCTGGATTTCATCGACTGTGGCCGGCTGGGTGTGGCGGACCGCTATCAGGACATAGCGTTGGCTAC  
CCGTGATATTGCTGAAGAGCTTGGCGGCGAATGGGCTGACCGCTTCCCTCGTGCTTTACGGTATCGCCGCTCCCGATT  
CGCAGCGCATCGCCTTCTATCGCCTTCTTGACGAGTTCTTCTGAGCGGGACTCTGGGGTTCGAAATGACCGACCAAG  
CGACGCCAACCTGCCATCACGAGATTTGATTCCACCGCCGCTTCTATGAAAGGTTGGGCTTCGGAATCGTTTTTC  
CGGGACGCCGGCTGGATGATCCTCCAGCGCGGGGATCTCATGCTGGAGTTCTTCGCCACCCCAACTTGTTTTATTGC  
AGCTTATAATGGTTACAAATAAAGCAATAGCATCACAAATTTACAAATAAAGCATTTTTTTTACTGCATTCTAGTT  
GTGGTTTTGTCCAAACTCATCAATGTATCTTATCATGTCTGTATACCGTCGACCTCTAGCTAGAGCTTGGCGTAATCA  
TGGTCATAGCTGTTTTCTGTGTGAAATTGTTATCCGCTCACAATTCACACAACATAACGAGCCGGAAGCATAAAGTG  
TAAAGCCTGGGGTGCTAATGAGTGAGCTAACTCACATTAATTGCGTTGCGCTCACTGCCCGCTTTCAGTCGGGAA  
ACCTGTGTCGCCAGCTGCATTAATGAATCGGCCAACCGCGGGGAGAGGCGGTTTTGCGTATTGGGCGCTCTTCCGCT  
TCCTCGCTCACTGACTCGCTGCGCTCGGTGCTTCCGGCTGCGGCGAGCGGTATCAGCTCACTCAAAGGCGGTAATACG  
GTTATCCACAGAATCAGGGGATAACGCAGGAAAGAACATGTGAGCAAAAAGGCCAGCAAAAAGGCCAGGAACCGTAAAA  
AGGCCGCGTTGCTGGCGTTTTTCCATAGGCTCCGCCCCCTGACGAGCATCACAAAAATCGACGCTCAAGTCAGAGG  
TGGCGAAACCCGACAGGACTATAAAGATAACAGGCGTTTTCCCCCTGGAAGCTCCCTCGTGCGCTCTCCTGTTCCGAC  
CCTGCCGCTTACCGGATACCTGTCCGCTTTTCTCCCTTCGGGAAGCGTGGCGCTTTTCTCATAGCTCACGCTGTAGGT  
ATCTCAGTTCCGGTGTAGGTGCTTCCGCTCCAAGCTGGGCTGTGTGCACGAACCCCCCGTTCCAGCCGACCGCTGCGCC  
TTATCCGGTAACTATCGTCTTGGAGTCCAACCCGGTAAGACACGACTTATCGCCACTGGCAGCAGCCACTGGTAACAG  
GATTAGCAGAGCGAGGTATGTAGGCGGTGCTACAGAGTTCTTGAAGTGGTGGCCTAACTACGGCTACACTAGAAGAA  
CAGTATTTGGTATCTGCGCTCTGCTGAAGCCAGTTACCTTCGGAAAAAGAGTTGGTAGCTCTTGATCCGGCAAACAA  
ACCACCGCTGGTAGCGGTTTTTTTTGTTTGCAAGCAGCAGATTACGCGCAGAAAAAAGGATCTCAAGAAGATCCTTT  
GATCTTTTTCTACGGGCTGACGCTCAGTGAACGAAAACCTCACGTTAAGGGATTTTTGGTCATGAGATTATCAAAAA  
GGATCTTACCTAGATCCTTTTTAAATTAATAATGAAGTTTTAAATCAATCTAAAGTATATATGAGTAAACTTGGTCT  
GACAGTTACCAATGCTTAATCAGTGAGGCACCTATCTCAGCGATCTGTCTATTTTCGTTTCATCCATAGTTGCCTGACT  
CCCCGTGCTGTAGATAACTACGATACGGGAGGGCTTACCATCTGGCCCCAGTGTGCAATGATACCGCGAGACCCAC  
GCTCACCGGCTCCAGATTTATCAGCAATAAACCAGCCAGCCGGAAGGGCCGAGCGCAGAAGTGGTCCTGCAACTTTA  
TCCGCTCCATCCAGTCTATTAATTGTTGCCGGGAAGCTAGAGTAAGTAGTTCCGCCAGTTAATAGTTTGCGCAACGT  
TGTTGCCATTGCTACAGGCATCGTGGTGTACGCTCGTCTGTTGGTATGGCTTCATTTCAGCTCCGGTTCCTAACGAT  
CAAGGCGAGTTACATGATCCCCATGTTGTGCAAAAAAGCGGTTAGCTCCTTCGGTCTCCGATCGTTGTGAGAAGT  
AAGTTGGCCGAGTGTATCACTCATGGTTATGGCAGCACTGCATAATTCTCTTACTGTGATGCCATCCGTAAGATG  
CTTTTCTGTGACTGGTGAAGTCAACCAAGTCATTCTGAGAATAGTGTATGCGGCGACCGAGTTGCTCTTGCCCGG  
CGTCAATACGGGATAATACCGCGCCACATAGCAGAACTTTAAAGTGCTCATCATTGGAAAACGTTCTTCGGGGCGA  
AAACTCTCAAGGATCTTACCCTGTTGAGATCCAGTTCGATGTAACCCACTCGTGCACCCAACTGATCTTCAGCATC  
TTTTACTTTACCAGCGTTTTCTGGGTGAGCAAAAAAGGAAGGCAAAATGCCGAAAAAAGGGAATAAGGGCGACAC  
GGAAATGTTGAATACTCATACTCTTCTTTTTCAATATTATTGAAGCATTATCAGGGTTATTGTCTCATGAGCGGA  
TACATATTTGAATGTATTTAGAAAAATAACAAATAGGGGTTCCGCGCACATTTCCCCGAAAAGTGCCACCTGACGT  
C

MAHHHHHHMRLFVSEGPSLPLVLAARARGRAELLI STVGPEECVVPFLTRPKVPVLQLDSGNLYFSASAICRYF  
FLLCGWEQDDLTNQWLEWEATELQPVL SAALHCLVVQKKGEDILGPLRRVLTHIDHLSLRQNC PFLAGDTE SLADI  
VLWGALYPLLQDPAYLPEELGALQSWFQTLSTQEPQRAAETVLKQGV LALRLYLQKQPQP PPEGR TVSNELE  
EEELATLSEEDIVTAVAWEKGLS LPLKLQHPVLPVPGERNVLITSANPYVNNVPHLGNI IGCVL SADVFARYC  
RLRQWNTLYLCGTDEYGTATETKAMEEGLTPREICDKYHAIHADIYRWFGISFDTFGRTTTPQQT KITQDIFQRLLT  
RGFVLRDTVEQLRCERCARFLADRFVEGVCPFCGYEEARGDQCDRCGLINAIELKKPQCKICRSCPVRSSQHLFL

DLPKLEKRLEDWLGKTPVPGSDWTPNARFIIIRSWLRDGLKPRCITRDLKWGTPVPLEGFEDKVFYVWFDATIGLVSIT  
 ANYTDQWEKWKWNPEQVDLYQFMAKDNVPFLGLVFPCSVLAGAEDNYTLVKHIIATEYLNIEDGKFSKSRGIGVFGDM  
 AKDTGIPADIWRFYLLYIRPEGQDSAFSWTDLLIKNSELNLLGNFINRAGMFVSKFFGGCVPEMALTTPDDRRLVA  
 HVSWEHQHYHQLLEKVRIRDALRSILTISRHNQYIQVNEPWKRIKGGEMDRQRAGTGTGMVAVNMAALLSVMLQPYM  
 PTVSSTIQTQLQLPPAACRILATSFICTLPAGHRIGTVSPLFQKLENDQIENLRQRFGGGQAKGSPKPAAVEAVTAA  
 GSQHIQTLTDEVTKQGNVVRELKAQKADKNQVAAEVAKLLDLKKQLALAEKPIETPKGKKK--

**Figure S7. The pMetRSNLL\_G vector for expression of the *E. coli* NLL-MetRS under CMV promoter control.** Restriction enzymes are highlighted in yellow, start codon in red, and the enzyme coding sequence is highlighted in green. Kozak sequence is highlighted in blue. The expressed protein sequence is included after the plasmid sequence.

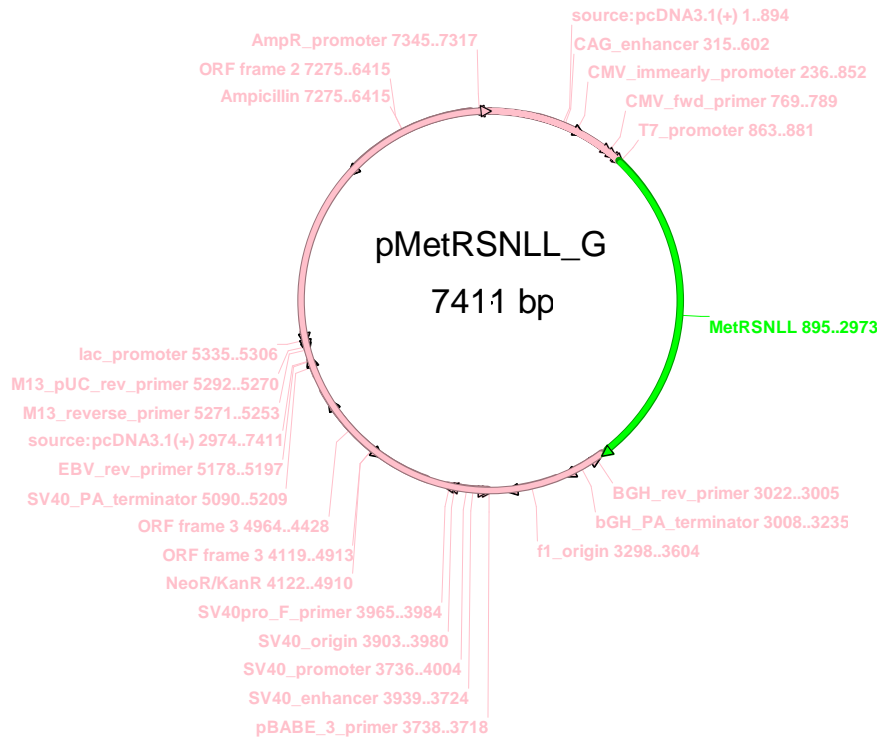

GACGGATCGGGAGATCTCCCGATCCCCTATGGTGCACTCTCAGTACAATCTGCTCTGATGCCGCATAGTTAAGCCAG  
 TATCTGCTCCCTGCTTGTGTGTTGGAGGTCGCTGAGTAGTGCGCGAGCAAAATTTAAGCTACAACAAGGCAAGGCTT  
 GACCGACAATTGCATGAAGAATCTGCTTAGGGTTAGGCGTTTTGCGCTGCTTCGCGATGTACGGGCCAGATATACGC  
 GTTGACATTGATTATTGACTAGTTATTAATAGTAATCAATTACGGGGTCATTAGTTTCATAGCCCATATATGGAGTTC  
 CGCGTTACATAACTTACGGTAAATGGCCCGCCTGGCTGACCGCCCAACGACCCCCGCCATTGACGTCAATAATGAC  
 GTATGTTCCCATAGTAACGCCAATAGGGACTTTCCATTGACGTCAATGGGTGGAGTATTTACGGTAAACTGCCCACT  
 TGGCAGTACATCAAGTGTATCATATGCCAAGTACGCCCCCTATTGACGTCAATGACGGTAAATGGCCCGCCTGGCAT  
 TATGCCCAGTACATGACCTTATGGGACTTTCTACTTGGCAGTACATCTACGTATTAGTCATCGCTATTACCATGGT  
 GATGCGGTTTTGGCAGTACATCAATGGGCGTGGATAGCGGTTTTGACTCACGGGGATTTCCAAGTCTCCACCCCATG  
 ACGTCAATGGGAGTTTTGTTTTGGCACCAAAATCAACGGGACTTTCCAAAATGTCGTAACAACCTCCGCCCCATTGACG  
 CAAATGGGCGGTAGGCGTGTACGGTGGGAGGTCTATATAAGCAGAGCTCTCTGGCTAACTAGAGAACCCACTGCTTA  
 CTGGCTTATCGAAATTAATACGACTCACTATAGGGAGACCCAAGCTGCTAGCGCCACCATGCCACCATCACCAT  
 CACCATACTCAAGTCGCGAAGAAAATCTGGTGACGTGCGCAAACCCGTACGCTAACGGCTCAATCCACCTCGGCCA  
 TATGCTGGAGCACATCCAGGCTGATGTCTGGGTCCGTTACCAGCGAATGCGCGGCCACGAGGTCAACTTCATCTGCG  
 CCGACGATGCCACGGTACACCGATCATGCTGAAAGCTCAGCAGCTTGGTATCACCCCGGAGCAGATGATTGGCGAA

ATGAGTCAGGAGCATCAGACTGATTTTCGCAGGCTTTAACATCAGCTATGACAACATCACTCGACGCACAGCGAAGA  
GAACCGCCAGTTGTGAGAAGTTATCTACTCTCGCCTGAAAGAAAACGGTTTTATTAAAAACCGCACCATCTCTCAGC  
TGTACGATCCGGAAAAAGGCATGTTTCTGCCGGACCGTTTTGTGAAAGGCACCTGCCCGAAATGTAAATCCCCGGAT  
CAATACGGCGATAACTGCGAAGTCTGCGGCGGACCTACAGCCCCGACTGAACTGATCGAGCCGAAATCGGTGGTTTT  
TGGCGCTACGCCGGTAATGCGTGATTCTGAACACTTCTTCTTTGATCTGCCCTCTTTCAGCGAAATGTTGCAGGCAT  
GGACCCGACGCGGTGCGTTGCAGGAGCAGGTGGCAAATAAAATGCAGGAGTGGTTTGAATCTGGCCTGCAACAGTGG  
GATATCTCCCGCGACGCCCTTACTTCGGTTTTGAAATCCGAACGCGCCGGGCAAATATTTCTACGTCTGGCTGGA  
CGCACCGATTGGCCTGATGGGTTCTTTCAAGAATCTGTGCGACAAGCGCGGCGACAGCGTAAGCTTCGATGAATACT  
GGAAGAAAGACTCCACCGCCGAGCTGTACCACTTCATCGGTAAAGATATTGTTTTACTTCTGAGCCTGTTCTGGCCT  
GCCATGCTGGAAGGCAGCAACTTCCGCAAGCCGTCCAACCTGTTTGTTCATGGCTATGTGACGGTGAACGGCGCAAA  
GATGTCCAAGTCTCGCGGCACCTTTATTAAGCCAGCACCTGGCTGAATCATTTTGACGCAGACAGCCTGCGTTACT  
ACTACACTGCGAAACTCTCTTCGCGCATTGATGATATCGATCTCAACCTGGAAGATTTGTTTCAGCGTGTGAATGCC  
GATATCGTTAACAAGTGGTTAACCTGGCCTCCCGTAATGCGGGCTTTATCAACAAGCGTTTTGACGGCGTGTGGC  
AAGCGAACTGGCTGACCCGACGTTGTACAAAACCTTCACTGATGCCGCTGAAGTGATTGGTGAAGCGTGGGAAAGCC  
GTGAATTTGGTAAAGCCGTGCGCGAAATCATGGCGCTGGCTGATCTGGCTAACCGCTATGTGATGAACAGGCTCCG  
TGGGTGGTGGCGAAACAGGAAGGCCGCGATGCCGACCTGCAGGCAATTTGCTCAATGGGCATCAACCTGTTCCGCGT  
GCTGATGACTTACCTGAAGCCGGTACTGCCGAACTGACCGAGCGTGCAGAAGCATTCTCAATACGGAAGTACCT  
GGGATGGTATCCAGCAACCGCTGCTGGGCCACAAAGTGAATCCGTTCAAGGCGCTGTATAACCGCATCGATATGAGG  
CAGGTTGAAGCACTGGTGGAAAGCCTCTAAAGAAGAAGTAAAGCCGCTGCCGCGCCGGTAACTGGCCCGCTGGCAGA  
TGATCCGATTCAGGAAACCATCACCTTTGACGACTTCGCTAAAGTTGACCTGCGCGTGGCGCTGATTGAAAACGCAG  
AGTTTTGTTGAAGTTCTGACAAACTGCTGCGCCTGACGCTGGATCTCGGCGGTGAAAAACGCAATGTCTTCTCCGGT  
ATTCGTTCTGCTTACCCGGATCCGACAGGCACTGATTGGTTCGTACACCATTATGGTGGCTAACCTGGCACCACGTAA  
AATGCGCTTCGGTATCTCTGAAGGCATGGTGTGCTGCGCGTCTGGCGGAAAGATATTTTCTGCTAAGCCCGG  
ATGCCGGTGTCTAAACCGGGTTCATCAGGTGAAATAAGAGCTCTCGAGTCTAGAGGGCCCGTTTTAAACCCGCTGATCA  
GCCTCGACTGTGCCTTCTAGTTGCCAGCCATCTGTTGTTTTGCCCTCCCCCGTGCCTTCTTACCCCTGGAAGGTGC  
CACTCCCACTGTCCTTTTCTAATAAAAATGAGGAAATTGCATCGCATTGTCTGAGTAGGTGTCATTCTATTCTGGGGG  
GTGGGGTGGGGCAGGACAGCAAGGGGGAGGATTGGGAAGACAATAGCAGGCATGCTGGGGATGCGGTGGGCTCTATG  
GCTTCTGAGGCGGAAAGAACCAGCTGGGGCTCTAGGGGGTATCCCCACGCGCCCTGTAGCGGCGCATTAAAGCGCGGC  
GGGTGTGGTGGTTACGCGCAGCGTGACCGCTACACTTGCCAGCGCCCTAGCGCCCGCTCCTTTTCGTTTTCTTCCCTT  
CCTTTCTCGCCACGTTCCCGGCTTTCCCCGTCAAGCTCTAAATCGGGGGCTCCCTTTAGGGTCCGATTTAGTGCT  
TTACGGCACCTCGACCCCAAAAACTTGATTAGGGTGTGTTTACGTAAGTGGGCCATCGCCCTGATAGACGGTTTTT  
TCGCCCTTTGACGTTGGAGTCCAGGTTCTTTAATAGTGGACTCTTGTTCAAAACCTGGAACAACACTCAACCCTATCT  
CGGTCTATTCTTTTGAATTTATAAGGGATTTTGCCGATTTCCGGCTATTGGTTAAAAAATGAGCTGATTTAACAAAA  
TTTAACCGGAATTAATTTCTGTGGAATGTGTGTGAGTTAGGGTGTGGAAAGTCCCCAGGCTCCCCAGCAGGCAGAAGT  
ATGCAAAGCATGCATCTCAATTAGTCAGCAACCAGGTGTGGAAAGTCCCCAGGCTCCCCAGCAGGCAGAAGTATGCA  
AAGCATGCATCTCAATTAGTCAGCAACCATAGTCCCGCCCTAACTCCGCCATCCCGCCCTAACTCCGCCAGTT  
CCGCCATTCTCCGCCCATGGCTGACTAATTTTTTTTTATTTATGCAGAGGCCGAGGCCGCTCTGCCTCTGAGCTA  
TTCCAGAAGTAGTGAGGAGGCTTTTTTGGAGGCCTAGGCTTTTGCAAAAAGCTCCCGGGAGCTTGTATATCCATTTT  
CGGATCTGATCAAGAGACAGGATGAGGATCGTTTTCGCATGATTGAACAAGATGGATTGCACGCAGGTTCTCCGGCCG  
CTTGGGTGGAGAGGCTATTCCGGCTATGACTGGGCACAACAGACAATCGGCTGCTCTGATGCCGCCGTGTTCCGGCTG  
TCAGCGCAGGGGCGCCCGTTCTTTTTGTCAAGACCGACCTGTCCGGTGCCCTGAATGAACTGCAGGACGAGGCAGC  
GCGGCTATCGTGGCTGGCCACGACGGGCGTTTCTTGCAGCTGTGCTCGACGTTGTCACTGAAGCGGGAAGGGACT  
GGCTGCTATTGGGCGAAGTGCCGGGGCAGGATCTCCTGTATCTCACCTTGCTCCTGCCGAGAAAGTATCCATCATG  
GCTGATGCAATGCGGCGGCTGCATACGCTTGATCCGGCTACCTGCCATTTCGACCACCAAGCGAAACATCGCATCGA  
GCGAGCACGTAAGGATGGAAGCCGGTCTTGTGATCAGGATGATCTGGACGAAGAGCATCAGGGGCTCGCGCCAG  
CCGAAGTTCGCCAGGCTCAAGGCGCGCATGCCCGACGGCGAGGATCTCGTTCGTGACCCATGGCGATGCCTGCTTG  
CCGAATATCATGGTGGAAAATGGCCGTTTTCTGGATTTCATCGACTGTGGCCGGCTGGGTGTGGCGGACCGCTATCA  
GGACATAGCGTTGGCTACCCGTGATATTGCTGAAGAGCTTGGCGGCGAATGGGCTGACCGCTTCTCGTGCTTTACG  
GTATCGCCGCTCCCGATTTCGAGCGCATCGCCTTCTATCGCCTTCTTGACGAGTTCTTCTGAGCGGGACTCTGGGGT

TCGAAATGACCGACCAAGCGACGCCAACCTGCCATCACGAGATTTTCGATTCCACCGCCGCTTCTATGAAAGGTTG  
GGCTTCGGAATCGTTTTCCGGGACGCCGGCTGGATGATCCTCCAGCGCGGGGATCTCATGCTGGAGTTCTTCGCCCA  
CCCCAATTGTTTTATTGCAGCTTATAATGGTTACAAATAAAGCAATAGCATCACAAATTTACAAATAAAGCATT  
TTTCACTGCATTCTAGTTGTGGTTTGTCCAAACTCATCAATGTATCTTATCATGTCTGTATACCGTCGACCTCTAGC  
TAGAGCTTGGCGTAATCATGGTCATAGCTGTTTCTGTGTGAAATTGTTATCCGCTCACAATTCACACAACATACG  
AGCCGGAAGCATAAAGTGTAAGCCTGGGGTGCCATAATGAGTGAGCTAACTCACATTAATTGCGTTGCGCTCACTGC  
CCGCTTTCCAGTCGGGAAACCTGTCGTGCCAGCTGCATTAATGAATCGGCCAACGCGCGGGGAGAGGCGGTTTGC  
ATTGGGCGCTCTTCCGCTTCCCTCGCTCACTGACTCGCTGCGCTCGGTTCGTTCCGGCTGCGGGGAGCGGTATCAGCTCA  
CTCAAAGGCGGTAATACGGTTATCCACAGAATCAGGGGATAACGCAGGAAAGAACATGTGAGCAAAAGGCCAGCAAA  
AGGCCAGGAACCGTAAAAAGGCCGCGTTGCTGGCGTTTTTCCATAGGCTCCGCCCCCTGACGAGCATCACAAAAAT  
CGACGCTCAAGTCAGAGGTGGCGAAACCCGACAGGACTATAAAGATACCAGGCGTTTTCCCCCTGGAAGCTCCCTCGT  
GCGCTCTCCTGTTCCGACCCTGCCGCTTACCGGATACCTGTCCGCTTTTCTCCCTTCGGAAGCGTGGCGCTTTCTC  
ATAGCTCACGCTGTAGGTATCTCAGTTCCGGTGTAGGTGTTCCGCTCCAAGCTGGGCTGTGTGCACGAACCCCCGTT  
CAGCCCCACCGCTGCGCTTATCCGGTAACTATCGTCTTGAGTCCAACCCGGTAAGACACGACTTATCGCCACTGGC  
AGCAGCCACTGGTAACAGGATTAGCAGAGCGAGGTATGTAGGCGGTGCTACAGAGTTCTTGAAGTGGTGGCCTAACT  
ACGGCTACACTAGAAGAACAGTATTTGGTATCTGCGCTCTGCTGAAGCCAGTTACCTTCGAAAAAGAGTTGGTAGC  
TCTTGATCCGGCAAACAAACCACCGCTGGTAGCGTTTTTTTTGTTTGAAGCAGCAGATTACGCGCAGAAAAAAGG  
ATCTCAAGAAGATCCTTTGATCTTTTCTACGGGTCTGACGCTCAGTGGAACGAAAACCTCACGTTAAGGGATTTTGG  
TCATGAGATTATCAAAAAGGATCTTACCTAGATCCTTTTAAATTAATAAATGAAGTTTTAAATCAATCTAAAGTATA  
TATGAGTAAACTTGGTCTGACAGTTACCAATGCTTAATCAGTGAGGCACCTATCTCAGCGATCTGTCTATTTTCGTT  
ATCCATAGTTGCCTGACTCCCCGTCGTGTAGATAACTACGATACGGGAGGGCTTACCATCTGGCCCCAGTGCTGCAA  
TGATACCGCGAGACCCACGCTCACCGCTCCAGATTTATCAGCAATAAACCAGCCAGCCGGAAGGGCCGAGCGCAGA  
AGTGGTCTGCAACTTTATCCGCTCCATCCAGTCTATTAATTGTTGCCGGAAGCTAGAGTAAGTAGTTCGCCAGT  
TAATAGTTTTCGCAACGTTGTTGCCATTGCTACAGGCATCGTGGTGTACGCTCGTCTGTTGGTATGGCTTCATTCA  
GCTCCGTTTCCCAACGATCAAGGCGAGTTACATGATCCCCATGTTGTGCAAAAAAGCGGTTAGCTCCTTCGGTCTCT  
CCGATCGTTGTGAGAAGTAAGTTGGCCGAGTGTATCACTCATGGTTATGGCAGCACTGCATAATTCTCTTACTGT  
CATGCCATCCGTAAGATGCTTTTTCTGTGACTGGTGTACTCAACCAAGTCATTCTGAGAATAGTGTATGCGGCGAC  
CGAGTTGCTCTTGCCTGGCGTCAATACGGGATAATACCGCGCCACATAGCAGAACTTTAAAGTGTCTCATATTGGA  
AAACGTTCTTTCGGGGCGAAAACCTCTCAAGGATCTTACCCTGTTGAGATCCAGTTTCGATGTAACCCACTCGTGCACC  
CAACTGATCTTACGATCTTTTACTTTTACCAGCGTTTCTGGGTGAGCAAAAAACAGGAAGGCAAAATGCCGCAAAAA  
AGGGAATAAGGGCGACACGGAATGTTGAATACTCATACTCTTCTTTTTCAATATTATTGAAGCATTATCAGGGT  
TATTGTCTCATGAGCGGATACATATTTGAATGTATTTAGAAAAATAACAAATAGGGGTTCCGCGCACATTTCCCGG  
AAAAGTGCCACCTGACGTC

MAHHHHHTQVAKKILVTCANPYANGSIHLGHMLEHIQADVWVRYQRMRGHEVNFICADDAHGTPIMLKAQQLGITP  
EQMIGEMSQEHTDFAGFNI SYDNYHSTHSEENRQLSELIYSRLKENGFIKNRTISQLYDPEKGMFLPDRFVKGTCP  
KCKSPDQYGDNCEVCGATYSPTELIEPKSVVSGATPVMRDSEHFFDLPSFSEMLQAWTRSGALQE QVANKMQEWF  
SGLQQWDISRDPYFGFEIPNAPGKYFYVWLDAP IGLMGSFKNLCKDRGDSVSFDEYWKDSTAELYHFIGKD IYF  
LSLFWPAMLEGSNFRKPSNL FVHG YTVNGAKMSKSRGTFIKASTWLNHFDADSLRYYTAKLSRIDDIDLNLEDF  
VQRVNADIVNKVVN LARSNAGFINKRF DGV LASELADPQLYKFTDAAEVI GEAWESREFGKAVREIMALADLANRY  
VDEQAPWVVAQEGRDADLQAICSMGINLFRVLMTYLKPVL PKLTERAE AFLNTELTWDGIQQPLLGHKVNPFKALY  
NRIDMRQVEALVEASKEEVKAAAAPVTG PLADDPIQETITFDDFAKVDLRVALIENAEFVEGSDKLLRLTLDLGGEK  
RNVFSGIRSAYPDPQALIGRHTIMVANLAPRKMFRGISEGMVMAAGPGGKDI FLLSPDAGAKPGHQVK-

**Figure S8. The pMetRSNLLtRNA\_G vector for expression of the *E. coli* NLL-MetRS under CMV promoter control.** Restriction enzymes are highlighted in yellow, start codon in red, and the enzyme coding sequence is highlighted in green. Kozak sequence is highlighted in blue. The expressed protein sequence is included after the plasmid sequence. This plasmid also contains the tRNA expression cassette as outlined in Figure 1b of the main text. The tRNA cassette was inserted into the BglIII restriction site in the plasmid and is lighted in pink.

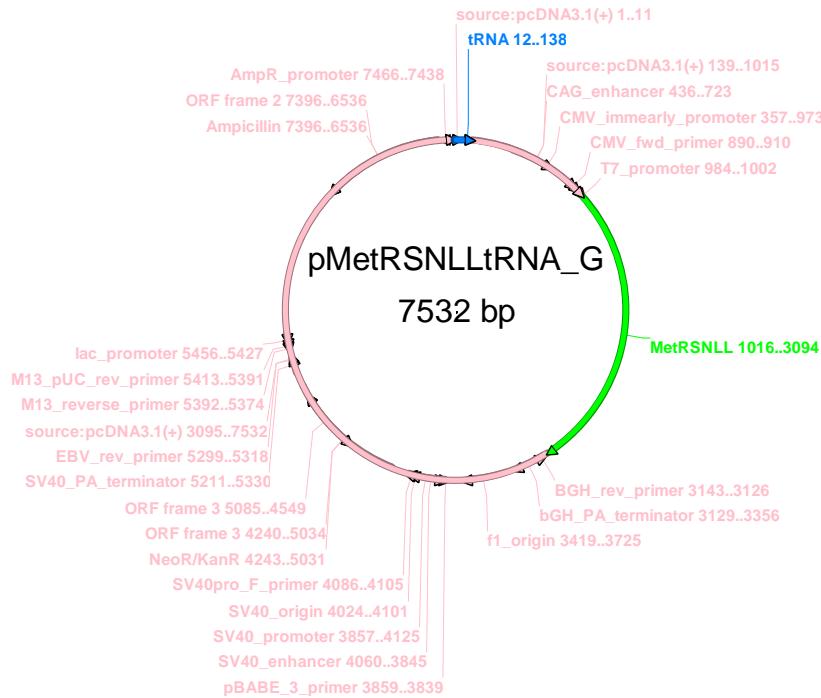

GACGGATCGGGAGATCTGATCCGACCGTGTGCTTGGCAGAACGGCTACGTAGCTCAGTTGGTTAGAGCACATCACTC  
ATAATGATGGGGTCACAGGTTTGAATCCCGTCGTAGCCACCAAGGTCCTTTTTTTGAGATCTCCCCATCCCCTATGGT  
GCACTCTCAGTACAATCTGCTCTGATGCCGCATAGTTAAGCCAGTATCTGCTCCCTGCTTGTGTGTTGGAGGTCGCT  
GAGTAGTGC GCGAGCAAAATTTAAGCTACAACAAGGCAAGGCTTGACCGACAATTGCATGAAGAATCTGCTTAGGGT  
TAGGCGTTTTGCGCTGCTTCGCGATGTACGGGCCAGATATACGCGTTGACATTGATTATTGACTAGTTATTAATAGT  
AATCAATTACGGGGTCATTAGTTCATAGCCCATATATGGAGTTCGCGGTTACATAACTTACGGTAAATGGCCCCGCT  
GGCTGACCGCCCAACGACCCCGCCCATTTGACGTCAATAATGACGTATGTTCCCATAGTAACGCCAATAGGGACTTT  
CCATTGACGTCAATGGGTGGAGTATTTACGGTAAACTGCCCACTGGCAGTACATCAAGTGTATCATATGCCAAGTA  
CGCCCCCTATTGACGTCAATGACGGTAAATGGCCCGCTGGCATTATGCCAGTACATGACCTTATGGGACTTTCTCT  
ACTTGGCAGTACATCTACGTATTAGTCATCGCTATTACCATGGTGTATGCGGTTTTGGCAGTACATCAATGGGCGTGG  
ATAGCGTTTTGACTCACGGGGATTTCCAAGTCTCCACCCCATTTGACGTCAATGGGAGTTTTGTTTTGGCACCAAAATC  
AACGGGACTTTCCAAAATGTCGTAACAACCTCCGCCCATTTGACGCAAAATGGGCGGTAGGCGTGTACGGTGGGAGGTC  
TATATAAGCAGAGCTCTCTGGCTAACTAGAGAACCCACTGCTTACTGGCTTATCGAAATTAATACGACTCACTATAG  
GGAGACCCAAGCTGGCTAGCGCCACCATGCCCCACCATCACCATACTCAAGTCGCGAAGAAAATTTCTGGTG  
ACGTGCGCAAACCCGTACGCTAACGGCTCAATCCACCTCGGCCATATGCTGGAGCACATCCAGGCTGATGTCTGGGT  
CCGTTACCAGCGAATGCGCGGCCACGAGGTCAACTTCATCTGCGCCGACGATGCCACGGTACACCGATCATGCTGA  
AAGCTCAGCAGCTTGGTATCACCCCGGAGCAGATGATTGGCGAAATGAGTCAGGAGCATCAGACTGATTTTCGCAGGC  
TTTAACATCAGCTATGACAACCTATCACTCGACGCACAGCGAAGAGAACCGCCAGTTGTCTCAGAATTTACTACTCTCG  
CCTGAAAGAAAACGGTTTTTATTAATAAACCGCACCATCTCTCAGCTGTACGATCCGGAAAAGGCATGTTTCTGCCGG  
ACCGTTTTGTGAAAGGCACCTGCCCGAAATGTAAATCCCGGATCAATACGGCGATAACTGCGAAGTCTGCGGCGCG  
ACCTACAGCCCGACTGAACTGATCGAGCCGAAATCGGTGGTTTTCTGGCGCTACGCCGGTAATGCGTGATTCTGAACA

CTTCTTCTTTGATCTGCCCTCTTTACGCGAAATGTTGCAGGCATGGACCCGACGCGGTGCGTTGCAGGAGCAGGTGG  
CAAATAAAATGCAGGAGTGGTTTGAATCTGGCCTGCAACAGTGGGATATCTCCCGCGACGCCCTTACTTCGGTTTTT  
GAAATTCGGAACGCGCCGGGCAAATATTTCTACGTCTGGCTGGACGCACCGATTGGCCTGATGGGTTCTTTCAAGAA  
TCTGTGCGACAAGCGCGGCGACAGCGTAAGCTTCGATGAATACTGGAAGAAAGACTCCACCGCCGAGCTGTACCACT  
TCATCGGTAAAGATATTGTTTACTTCCTGAGCCTGTTCTGGCCTGCCATGCTGGAAGGCAGCAACTTCCGCAAGCCG  
TCCAACCTGTTTGTTCATGGCTATGTGACGGTGAACGGCGCAAAGATGTCCAAGTCTCGCGGCACCTTTATTAAAGC  
CAGCACCTGGCTGAATCATTGACGCAGACAGCCTGCGTTACTACTACACTGCGAAACTCTCTTCGCGCATTGATG  
ATATCGATCTCAACCTGGAAGATTTGTTTCAGCGTGTGAATGCCGATATCGTTAACAAAGTGGTTAACCTGGCCTCC  
CGTAATGCGGGCTTTATCAACAAGCGTTTTGACGGCGTGTGGCAAGCGAACTGGCTGACCCGACGTTGTACAAAAC  
CTTCACTGATGCCGCTGAAGTGATTGGTGAAGCGTGGGAAAGCCGTGAATTTGGTAAAGCCGTGCGCGAAATCATGG  
CGCTGGCTGATCTGGCTAACCGCTATGTCGATGAACAGGCTCCGTGGGTGGTGGCGAAACAGGAAGGCCGCGATGCC  
GACCTGCAGGCAATTTGCTCAATGGGCATCAACCTGTTCCGCGTGTGATGACTTACCTGAAGCCGGTACTGCCGAA  
ACTGACCGAGCGTGCAGAAGCATTCTCAATACGGAAGTACCTGGGATGGTATCCAGCAACCGCTGCTGGGCCACA  
AAGTGAATCCGTTCAAGGCGCTGTATAACCGCATCGATATGAGGCAGGTTGAAGCACTGGTGAAGCCCTCTAAAGAA  
GAAGTAAAAGCCGCTGCCGCGCCGGTAACTGGCCCGCTGGCAGATGATCCGATTCCAGGAAACCATCACCTTTGACGA  
CTTCGCTAAAGTTGACCTGCGCGTGGCGCTGATTGAAAACGCAGAGTTTGTGAAAGTTCTGACAAAACCTGCTGCGCC  
TGACGCTGGATCTCGGCGGTGAAAACGCAATGTCTTCTCCGGTATTGTTCTGCTTACCCGGATCCGCGAGGCACTG  
ATTGGTCGTCACACCATTATGGTGGCTAACCTGGCACCACGTAATAATGCGCTTCGGTATCTCTGAAGGCATGGTGT  
GGCTGCCGGTCTGGCGGGAAAGATATTTCTGCTAAGCCCGGATGCCGGTGTAAACCGGGTTCATCAGGTGAAAT  
AAGAGCTCCTCGAGTCTAGAGGGCCCGTTTTAAACCCGCTGATCAGCCTCGACTGTGCCTTCTAGTTGCCAGCCATCT  
GTTGTTTGGCCCTCCCCCGTGCCTTCCTTGACCCTGGAAGGTGCCACTCCCCTGTCCTTTTCTAATAAAAATGAGGA  
AATTGCATCGCATTGTCTGAGTAGGTGTCAATCTATTCTGGGGGGTGGGGTGGGGCAGGACAGCAAGGGGGAGGATT  
GGGAAGACAATAGCAGGCATGCTGGGGATGCGGTGGGCTCTATGGCTTCTGAGGCGGAAAGAACCAGCTGGGGCTCT  
AGGGGGTATCCCCACGCGCCCTGTAGCGGCGCATTAAAGCGCGCGGGTGTGGTGGTTACGCGCAGCGTGACCGCTAC  
ACTTGCCAGCGCCCTAGCGCCCGCTCCTTTGCTTTCTTCCCTTCTTTCTCGCCACGTTCCGCGGCTTTCCCCGTC  
AAGCTCTAAATCGGGGGCTCCCTTTAGGGTTCCGATTTAGTGCTTTACGGCACCTCGACCCCCAAAAAATTGATTAG  
GGTGATGGTTACGTAGTGGGCCATCGCCCTGATAGACGGTTTTTTCGCCCTTTGACGTTGGAGTCCACGTTCTTTAA  
TAGTGGACTCTTGTTCAAAACCTGGAACAACACTCAACCCTATCTCGGTCTATTCTTTTGAATTTATAAGGGATTTTGC  
CGATTTTCGGCCTATTGGTTAAAAAATGAGCTGATTTAACAAAAATTTAACCGGAATTAATTCTGTGGAATGTGTGTC  
AGTTAGGGTGTGGAAAGTCCCCAGGCTCCCCAGCAGGCAGAAGTATGCAAAGCATGCATCTCAATTAGTCAGCAACC  
AGGTGTGGAAAGTCCCCAGGCTCCCCAGCAGGCAGAAGTATGCAAAGCATGCATCTCAATTAGTCAGCAACCATAGT  
CCCGCCCTAACTCCGCCATCCCGCCCTAACTCCGCCAGTTCGCGCCATTCTCCGCCCATGGCTGACTAATTT  
TTTTTATTTATGCAGAGGCCGAGGCCGCTCTGCCTCTGAGCTATTCCAGAAGTAGTGAGGAGGCTTTTTTGGAGGC  
CTAGGCTTTTGCAAAAGCTCCCGGGAGCTTGTATATCCATTTTCGGATCTGATCAAGAGACAGGATGAGGATCGTT  
TCGCATGATTGAACAAGATGGATTGCACGCAGGTTCTCCGGCCGCTTGGGTGGAGAGGCTATTCCGGCTATGACTGGG  
CACAACAGACAATCGGCTGCTCTGATGCCGCCGTGTTCCGGCTGTCAGCGCAGGGGCGCCCGGTTCTTTTTGTCAAG  
ACCGACCTGTCCGGTGCCCTGAATGAACTGCAGGACGAGGCAGCGCGGCTATCGTGGCTGGCCACGACGGGCGTTCC  
TTGCGCAGCTGTGCTCGACGTTGTCACTGAAGCGGGAAGGGACTGGCTGCTATTGGGCGAAGTGCCGGGGCAGGATC  
TCCTGTCACTCACCTTGCTCCTGCCGAGAAAGTATCCATCATGGCTGATGCAATGCGGCGGCTGCATACGCTTGAT  
CCGGCTACCTGCCATTTCGACCACCAAGCGAAACATCGCATCGAGCGAGCACGTACTIONCGGATGGAAGCCGGTCTTGT  
CGATCAGGATGATCTGGACGAAGAGCATCAGGGGCTCGCGCCAGCCGAAGTTCGCCAGGCTCAAGGCGCGCATGC  
CCGACGGCGAGGATCTCGTCGTGACCCATGGCGATGCCTGCTTGCCGAATATCATGGTGGAAAATGGCCGCTTTTCT  
GGATTCATCGACTGTGGCCGGCTGGGTGTGGCGGACCGCTATCAGGACATAGCGTTGGCTACCCGTGATATTGCTGA  
AGAGCTTGGCGGCGAATGGGCTGACCGCTTCTCGTGCTTTACGGTATCGCCGCTCCCGATTTCGAGCGCATCGCCT  
TCTATCGCCTTCTTGACGAGTTCTTCTGAGCGGGACTCTGGGGTTGAAATGACCGACCAAGCGACGCCAACCTGC  
CATCACGAGATTTGATTCCACCGCCGCTTCTATGAAAGTTGGGCTTCGGAATCGTTTTCCGGGACGCCGGCTGG  
ATGATCCTCCAGCGGGGATCTCATGCTGGAGTTCTTCGCCACCCCAACTTGTTTATTGCAGCTTATAATGGTTA  
CAAATAAAGCAATAGCATCACAAATTTACAAATAAAGCATTTTTTTCACTGCATTCTAGTTGTGGTTTTGTCAAAC  
TCATCAATGTATCTTATCATGTCTGTATAACCGTCGACCTCTAGCTAGAGCTTGGCGTAATCATGGTCATAGCTGTTT

CCTGTGTGAAATTGTTATCCGCTCACAATTCCACACAACATACGAGCCGGAAGCATAAAGTGTAAAGCCTGGGGTGC  
CTAATGAGTGAGCTAACTCACATTAATTGCGTTGCGCTCACTGCCCGCTTTCCAGTCGGGAAACCTGTCGTGCCAGC  
TGCATTAATGAATCGGCCAACGCGCGGGGAGAGGCGGTTTTCGCTATTGGGCGCTCTTCCGCTTCCCTCGCTCACTGAC  
TCGCTGCGCTCGGTCGTTTCGGCTGCGGCGAGCGGTATCAGCTCACTCAAAGGCGGTAATACGGTTATCCACAGAATC  
AGGGGATAACGCAGGAAAGAACATGTGAGCAAAAGGCCAGCAAAAGGCCAGGAACCGTAAAAAGGCCGCGTTGCTGG  
CGTTTTTCCATAGGCTCCGCCCCCTGACGAGCATCACAAAAATCGACGCTCAAGTCAGAGGTGGCGAAACCCGACA  
GGACTATAAAGATAACCAGGCGTTTTCCCCCTGGAAGCTCCCTCGTGCCTCTCCTGTTCCGACCCTGCCGCTTACCGG  
ATACCTGTCCGCCTTTCTCCCTTCGGGAAGCGTGGCGCTTTCTCATAGCTCACGCTGTAGGTATCTCAGTTCGGTGT  
AGGTCGTTTCGCTCCAAGCTGGGCTGTGTGCACGAACCCCGTTTCAGCCCCGACCGCTGCGCCTTATCCGGTAACTAT  
CGTCTTGAGTCCAACCCGGTAAGACACGACTTATCGCCACTGGCAGCAGCCACTGGTAACAGGATTAGCAGAGCGAG  
GTATGTAGGCGGTGCTACAGAGTTCCTGAAGTGGTGGCCTAACTACGGCTACACTAGAAGAACAGTATTTGGTATCT  
GCGCTCTGCTGAAGCCAGTTACCTTCGAAAAAGAGTTGGTAGCTCTTGATCCGGCAAACAAACCACCGCTGGTAGC  
GGTTTTTTTTGTTTGAAGCAGCAGATTACGCGCAGAAAAAAGGATCTCAAGAAGATCCTTTGATCTTTTTCTACGGG  
GTCTGACGCTCAGTGAACGAAAACACTCACGTTAAGGGATTTTGGTTCATGAGATTATCAAAAAGGATCTTACCTAGA  
TCCTTTTAAATTAATAAATGAAGTTTTAAATCAATCTAAAGTATATATGAGTAAACTTGGTCTGACAGTTACCAATGC  
TTAATCAGTGAGGCACCTATCTCAGCGATCTGTCTATTTTCGTTTCATCCATAGTTGCCTGACTCCCCGTCGTGTAGAT  
AACTACGATACGGGAGGGCTTACCATCTGGCCCCAGTGCTGCAATGATACCGCGAGACCCACGCTCACCGGCTCCAG  
ATTTATCAGCAATAAACCAGCCAGCCGGAAGGGCCGAGCGCAGAAGTGGTCTGCAACTTTATCCGCTCCATCCAG  
TCTATTAATTGTTGCCGGGAAGCTAGAGTAAGTAGTTCGCCAGTTAATAGTTTTCGCAACGTTGTTGCCATTGCTAC  
AGGCATCGTGGTGTACGCTCGTTCGTTTGGTATGGCTTCATTCAGCTCCGTTCCCAACGATCAAGGCGAGTTACAT  
GATCCCCATGTTGTGCAAAAAGCGGTTAGCTCCTTCGGTCCCTCCGATCGTTGTCAGAAGTAAGTTGGCCGCGAGTG  
TTACTACTCATGGTTATGGCAGCACTGCATAATTCTCTTACTGTTCATGCCATCCGTAAGATGCTTTTTCTGTGACTGG  
TGAGTACTCAACCAAGTCATTCTGAGAATAGTGTATGCGGCGACCGAGTTGCTCTTGCCCGGCGTCAATACGGGATA  
ATACCGCGCCACATAGCAGAACCTTTAAAAGTGCTCATCATTGGAAAACGTTCTTCGGGGCGAAAACCTCTCAAGGATC  
TTACCGCTGTTGAGATCCAGTTCGATGTAACCCACTCGTGCACCCAACTGATCTTCAGCATCTTTTACTTTTACCAG  
CGTTTCTGGGTGAGCAAAAACAGGAAGGCAAAATGCCGCAAAAAGGGAATAAGGGCGACACGGAAATGTTGAATAC  
TCATACTCTTCTTTTTTCAATATTATTGAAGCATTATCAGGGTTATTGTCTCATGAGCGGATACATATTTGAATGT  
ATTTAGAAAAATAAACAAATAGGGGTTCCGCGCACATTTCCCCGAAAAGTGCCACCTGACGTC

MAHHHHHTQVAKKILVTCANPYANGSIHLGHMLEHIQADVWVRYQRMRGHEVNFICADDAHGTPIMLKAQQLGITP  
EQMIGEMSQEHTDFAGFNI SYDNYHSTHSEENRQLSELIYSRLKENGFIKNRTISQLYDPEKGMFLPDRFVKGTCP  
KCKSPDQYGDNCEVCGATYSPTELIEPKSVVSGATPVMRDSEHFFFDLPSFSEMLQAWTRSGALQE QVANKMQEWF  
SGLQQWDISRDPYFGFEIPNAPGKYFYVWLDAPIGLMGSFKNLCKDRGDSVSFDEYWKKDSTAELYHF IGKDIVYF  
LSLFWPAMLEGSNFRKPSNLVHGYVTVNGAKMSKSRGTFIKASTWLNHFDADSLRYYTAKLSSRIDIDLNLEDF  
VQRVNADIVNKVVNLSRNAGFINKRFDGVLASELADPQLYKFTDAAEVI GEAWESREFGKAVREIMALADLANRY  
VDEQAPWVAKQEGRDADLQAICSMGINLFRVLMTYLKPVLPKLERAEAFNLTELTWDGIQQPLLGHKVNPFKALY  
NRIDMRQVEALVEASKEEVKAAAPVTGPLADDPIQETITFDDFAKVDLRVALIENAEFVEGSDKLLRLTLDLGGEK  
RNVFSGIRSAYPDPQALIGRHTIMVANLAPRKMRFGISEGMVMAAGPGGKDI FLLSPDAGAKPGHQVK-



**Figure S9. The pMetRSNLLtRNA<sub>dcca</sub>\_G vector for expression of the *E. coli* NLL-MetRS under CMV promoter control.** Restriction enzymes are highlighted in yellow, start codon in red, and the enzyme coding sequence is highlighted in green. Kozak sequence is highlighted in blue. The expressed protein sequence is included after the plasmid sequence. This plasmid also contains the tRNA expression cassette as outlined in Figure 1b of the main text, wherein the CCA tail of the tRNA was removed in this sequence. The tRNA cassette was inserted into the BglII restriction site in the plasmid and is lighted in pink.

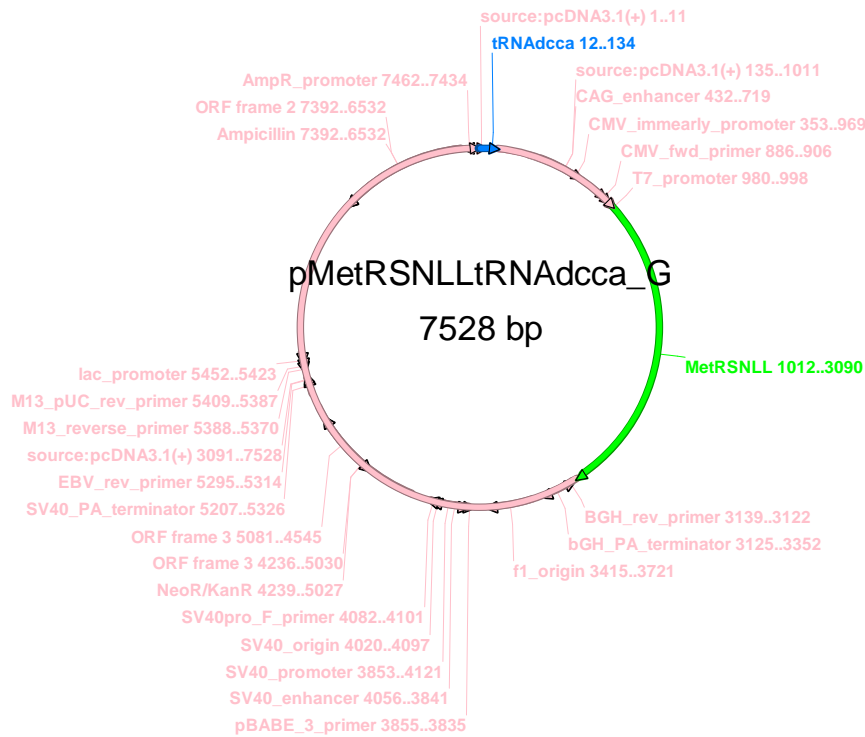

GACGGATCGGGAGATCTGATCCGACCGTGTGCTTGGCAGAACGGCTACGTAGCTCAGTTGGTTAGAGCACATCACTC  
ATAATGATGGGGTACAGGTTTGAATCCCGTCGTAGCCAGTCCCTTTTTTTGAGATCTCCCCGATCCCCTATGGTGCAC  
TCTCAGTACAATCTGCTCTGATGCCGCATAGTTAAGCCAGTATCTGCTCCCTGCTTGTGTGTTGGAGGTCGCTGAGT  
AGTGCGCGAGCAAAATTTAAGCTACAACAAGGCAAGGCTTGACCGACAATTGCATGAAGAATCTGCTTAGGGTTAGG  
CGTTTTGCGCTGCTTCGCGATGTACGGGCCAGATATACGCGTTGACATTGATTATTGACTAGTTATTAATAGTAATC  
AATTACGGGGTCATTAGTTCATAGCCCATATATGGAGTTCGCGTTACATAACTTACGGTAAATGGCCCGCTGGCT  
GACCGCCCAACGACCCCGCCCATTTGACGTCAATAATGACGTATGTTCCCATAGTAACGCCAATAGGGACTTTCCAT  
TGACGTCAATGGGTGGAGTATTTACGGTAAACTGCCCACTTGGCAGTACATCAAGTGTATCATATGCCAAGTACGCC  
CCCTATTGACGTCAATGACGGTAAATGGCCCGCTGGCATTATGCCAGTACATGACCTTATGGGACTTTCTACTT  
GGCAGTACATCTACGTATTAGTCATCGCTATTACCATGGTGTATGCGGTTTTGGCAGTACATCAATGGGCGTGGATAG  
CGGTTTGACTCACGGGGATTTCCAAGTCTCCACCCATTGACGTCAATGGGAGTTTGTGTTGGCACCAAAATCAACG  
GGACTTTCCAAAATGTCGTAACAACCTCCGCCCCATTGACGCAAATGGGCGGTAGGCGTGTACGGTGGGAGGTCTATA  
TAAGCAGAGCTCTCTGGCTAACTAGAGAACCCACTGCTTACTGGCTTATCGAAATTAATACGACTCACTATAGGGAG  
ACCCAAGCTGGCTAGCGCCACCATGGCCACCATCACCATCACCATACTCAAGTCGCGAAGAAAATTCTGGTGACGT  
GCGCAAACCCGTACGCTAACGGCTCAATCCACCTCGGCCATATGCTGGAGCACATCCAGGCTGATGTCTGGGTCCGT  
TACCAGCGAATGCGCGGCCACGAGGTCAACTTCATCTGCGCCGACGATGCCACGGTACACCGATCATGCTGAAAGC  
TCAGCAGCTTGGTATCACCCCGGAGCAGATGATTGGCGAAATGAGTCAGGAGCATCAGACTGATTTTCGAGGCTTTA  
ACATCAGCTATGACAACATCACTCGACGCACAGCGAAGAGAACCGCCAGTTGTCAGAACTTATCTACTCTCGCCTG

AAAGAAAACGGTTTTATTAAAAACCGCACCATCTCTCAGCTGTACGATCCGGAAAAAGGCATGTTTCTGCCGGACCG  
TTTTGTGAAAGGCACCTGCCCGAAATGTAAATCCCCGGATCAATACGGCGATAACTGCGAAGTCTGCGGCGCGACCT  
ACAGCCCGACTGAACTGATCGAGCCGAAATCGGTGGTTTTCTGGCGCTACGCCGGTAATGCGTGATTCTGAACACTTC  
TTCTTTGATCTGCCCTCTTTTCAGCGAAATGTTGCAGGCATGGACCCGAGCGGTGCGTTGCAGGAGCAGGTGGCAAA  
TAAAATGCAGGAGTGGTTTGAATCTGGCCTGCAACAGTGGGATATCTCCCGCGACGCCCTTACTTCGGTTTTGAAA  
TTCCGAACGCGCCGGGCAAAATTTCTACGTCTGGCTGGACGCACCGATTGGCCTGATGGGTTCTTTCAAGAATCTG  
TGCGACAAGCGCGGGCAGAGCGTAAGCTTCGATGAATACTGGAAGAAAGACTCCACCGCCGAGCTGTACCCTTCAT  
CGGTAAGATATTGTTTACTTCTGAGCCTGTTCTGGCCTGCCATGCTGGAAGGCAGCAACTTCCGCAAGCCGTCCA  
ACCTGTTTTGTTTCATGGCTATGTGACGGTGAACGGCGCAAAGATGTCCAAGTCTCGCGGCACCTTTATTAAAGCCAGC  
ACCTGGCTGAATCATTTTTCAGCGAGACAGCCTGCGTTACTACTACACTGCGAAACTCTCTTCGCGCATTGATGATAT  
CGATCTCAACCTGGAAGATTTTCGTTTCAGCGTGTGAATGCCGATATCGTTAACAAAGTGGTTAACCTGGCCTCCCGTA  
ATGCGGGCTTTATCAACAAGCGTTTTGACGGCGTGTGGCAAGCGAACTGGCTGACCCGCGAGTTGTACAAAACCTTC  
ACTGATGCCGCTGAAGTGATTGGTGAAGCGTGGGAAAGCCGTGAATTTGGTAAAGCCGTGCGCGAAATCATGGCGCT  
GGCTGATCTGGCTAACCGCTATGTCGATGAACAGGCTCCGTGGGTGGTGGCGAAACAGGAAGGCCGCGATGCCGACC  
TGCAGGCAATTTGCTCAATGGGCATCAACCTGTTCCGCGTGTGATGACTTACCTGAAGCCGGTACTGCCGAAACTG  
ACCGAGCGTGCAGAAGCATTCTCAATACGGAAGTACCTGGGATGGTATCCAGCAACCGCTGCTGGGCCACAAAGT  
GAATCCGTTCAAGGCGCTGTATAACCGCATCGATATGAGGCAGGTTGAAGCACTGGTGAAGCCCTCTAAAGAAGAAG  
TAAAAGCCGCTGCCGCGCCGGTAACTGGCCCGCTGGCAGATGATCCGATTCAGGAAACCATCACCTTTGACGACTTC  
GCTAAAGTTGACCTGCGCGTGGCGCTGATTGAAAACGCAGAGTTTGTGAAGGTTCTGACAAACTGCTGCGCCTGAC  
GCTGGATCTCGGCGGTGAAAAACGCAATGTCTTCTCCGGTATTGTTCTGCTTACCCGGATCCGCAGGCCTGATTG  
GTCGTCACACCATTATGGTGGCTAACCTGGCACCACGTAATAATGCGCTTCCGGTATCTCTGAAGGCATGGTGATGGCT  
GCCGGTCTGGCGGGAAAGATATTTTCTGCTAAGCCCGGATGCCGGTGTAAACCCGGTTCATCAGGTGAAATAAGGA  
GCTCCTCGAGTCTAGAGGGCCCCGTTTTAAACCCGCTGATCAGCCTCGACTGTGCCTTCTAGTTGCCAGCCATCTGTTG  
TTTGGCCCTCCCCCGTGCCTTTCCTTGACCCTGGAAGGTGCCACTCCCCTGTCCTTTTCTAATAAAAATGAGGAAATT  
GCATCGCATTGTCTGAGTAGGTGTCAATCTATTCTGGGGGGTGGGGTGGGGCAGGACAGCAAGGGGGAGGATTGGGA  
AGACAATAGCAGGCATGCTGGGGATGCGGTGGGCTCTATGGCTTCTGAGGCGGAAAGAACCAGCTGGGGCTCTAGGG  
GGTATCCCCACGCGCCCTGTAGCGGCGCATTAAAGCGCGCGGGTGTGGTGGTTACGCGCAGCGTGACCGCTACACTT  
GCCAGCGCCCTAGCGCCCGCTCCTTTTCGCTTTCTTCCCTTCTTTCTCGCCACGTTTCGCCGGCTTTCCCCGTCAAGC  
TCTAAATCGGGGGCTCCCTTTAGGGTTCCGATTTAGTGCTTTACGGCACCTCGACCCCAAAAACTTGATTAGGGTG  
ATGGTTCACGTAGTGGCCATCGCCCTGATAGACGGTTTTTCGCCCTTTGACGTTGGAGTCCACGTTCTTTAATAGT  
GGACTCTTGTTCAAACTGGAACAACACTCAACCCTATCTCGGTCTATTCTTTTGATTTATAAGGGATTTTGCCGAT  
TTCGGCCTATTGGTTAAAAAATGAGCTGATTTAACAAAAATTTAACGCGAATTAATTCTGTGGAATGTGTGTCAGTT  
AGGGTGTGGAAAGTCCCCAGGCTCCCCAGCAGGCAGAAGTATGCAAAGCATGCATCTCAATTAGTCAGCAACCAGGT  
GTGGAAGTCCCCAGGCTCCCCAGCAGGCAGAAGTATGCAAAGCATGCATCTCAATTAGTCAGCAACCATAGTCCCCG  
CCCCTAACTCCGCCCATCCCGCCCCTAACTCCGCCCAGTTCCGCCCATTCTCCGCCCCATGGCTGACTAATTTTTTTT  
TATTTATGCAGAGGCCGAGGCCGCTCTGCCTCTGAGCTATTCCAGAAGTAGTGAGGAGGCTTTTTTGGAGGCCTAG  
GCTTTTGCAAAAAGCTCCCGGGAGCTTGTATATCCATTTTCGGATCTGATCAAGAGACAGGATGAGGATCGTTTTCGC  
ATGATTGAACAAGATGGATTGCACGCAGGTTCTCCGGCCGCTTGGGTGGAGAGGCTATTCCGGCTATGACTGGGCACA  
ACAGACAATCGGCTGCTCTGATGCCGCCGTGTTCCGGCTGTCAGCGCAGGGGCGCCCGGTTCTTTTTGTCAAGACCG  
ACCTGTCCGGTGCCCTGAATGAACTGCAGGACGAGGCAGCGCGGCTATCGTGGCTGGCCACGACGGGCGTTTCTTGC  
GCAGCTGTGCTCGACGTTGTCACTGAAGCGGGAAGGGACTGGCTGCTATTGGGCGAAGTGCCGGGGCAGGATCTCCT  
GTCATCTCACCTTGCTCCTGCCGAGAAAGTATCCATCATGGCTGATGCAATGCGGCGGCTGCATACGCTTGATCCGG  
CTACCTGCCCATTCGACCACCAAGCGAAACATCGCATCGAGCGAGCACGTAATCGGATGGAAGCCGGTCTTGTGCGAT  
CAGGATGATCTGGACGAAGAGCATCAGGGGCTCGCGCCAGCCGAACTGTTCCGCCAGGCTCAAGGCGCGCATGCCCGA  
CGGCGAGGATCTCGTCTGACCCATGGCGATGCCTGCTTCCGCAATATCATGGTGGAAAATGGCCGCTTTTTCTGGAT  
TCATCGACTGTGGCCGGCTGGGTGTGGCGGACCGCTATCAGGACATAGCGTTGGCTACCCGTGATATTGCTGAAGAG  
CTTGGCGGCGAATGGGCTGACCGCTTCTCGTGCTTTACGGTATCGCCGCTCCCGATTTCGAGCGCATCGCCTTCTA  
TCGCCTTCTTGACGAGTTCTTCTGAGCGGGACTCTGGGGTTGAAATGACCGACCAAGCGACGCCAACCTGCCATC  
ACGAGATTTTCGATTCCACCGCCGCTTCTATGAAAGGTTGGGCTTCGGAATCGTTTTTCCGGGACGCCGGCTGGATGA

TCCTCCAGCGCGGGGATCTCATGCTGGAGTTCTTCGCCACCCCAACTTGTTTTATTGCAGCTTATAATGGTTACAAA  
TAAAGCAATAGCATCACAAATTTACAAATAAAGCATTTTTTTTCACTGCATTCTAGTTGTGGTTTGTCCAAACTCAT  
CAATGTATCTTATCATGTCTGTATACCGTCGACCTCTAGCTAGAGCTTGGCGTAATCATGGTCATAGCTGTTTCCTG  
TGTGAAATTGTTATCCGCTCACAATTCCACACAACATACGAGCCGGAAGCATAAAGTGTAAGCCTGGGGTGCCTAA  
TGAGTGAGCTAACTCACATTAATTGCGTTGCGCTCACTGCCCGCTTTCCAGTCGGAACCTGTCTGTCAGCTGCA  
TTAATGAATCGGCCAACGCGCGGGGAGAGGCGGTTTTGCGTATTGGGCGCTCTTCCGCTTCCCTCGCTCACTGACTCGC  
TGCCTCGGTCTGTTCCGCTGCGGCGAGCGGTATCAGCTCACTCAAAGGCGGTAATACGGTTATCCACAGAATCAGGG  
GATAACGCAGGAAAGAATGTGTAGCAAAAAGGCCAGCAAAAAGGCCAGGAACCGTAAAAAGGCCGCGTTGCTGGCGTT  
TTTCCATAGGCTCCGCCCCCTGACGAGCATCACAAAATCGACGCTCAAGTCAGAGGTGGCGAAACCCGACAGGAC  
TATAAAGATACCAGGCGTTTTCCCCCTGGAAGCTCCCTCGTGCCTCTCCTGTTCCGACCCTGCCGCTTACCGGATAC  
CTGTCCGCCTTTCTCCCTTCGGGAAGCGTGGCGCTTTCTCATAGCTCACGCTGTAGGTATCTCAGTTCCGGTGTAGGT  
CGTTCGCTCCAAGCTGGGCTGTGTGCACGAACCCCGTTCCAGCCGACCCTGCGCTTATCCGGTAACTATCGTC  
TTGAGTCCAACCCGTAAGACACGACTTATCGCCACTGGCAGCAGCCACTGGTAACAGGATTAGCAGAGCGAGGTAT  
GTAGGCGGTGCTACAGAGTTCTTGAAGTGGTGGCCTAACTACGGCTACACTAGAAGAACAGTATTTGGTATCTGCGC  
TCTGCTGAAGCCAGTTACCTTCGGAAGAGTTGGTAGCTCTTGATCCGGCAAACAAACCACCGCTGGTAGCGGTT  
TTTTTGTGTTGCAAGCAGCAGATTACGCGCAGAAAAAAGGATCTCAAGAAGATCCTTTGATCTTTTCTACGGGGTCT  
GACGCTCAGTGGAACGAAAACCTCACGTTAAGGGATTTTTGGTCATGAGATTATCAAAAAGGATCTTACCTAGATCCT  
TTTAAATTAATAATGAAGTTTTAAATCAATCTAAAGTATATATGAGTAACTTGGTCTGACAGTTACCAATGCTTAA  
TCAGTGAGGCACCTATCTCAGCGATCTGTCTATTTGTTTCATCCATAGTTGCCTGACTCCCCGTCGTGTAGATAACT  
ACGATACGGGAGGGCTTACCATCTGGCCCCAGTGCTGCAATGATACCGCGAGACCCACGCTCACCGGCTCCAGATTT  
ATCAGCAATAAACAGCCAGCCGGAAGGGCCGAGCGCAGAAGTGGTCTGCAACTTTATCCGCTCCATCCAGTCTA  
TTAATTGTTGCCGGGAAGCTAGAGTAAGTAGTTGCCAGTTAATAGTTTGCACAACGTTGTTGCCATTGCTACAGGC  
ATCGTGGTGTACGCTCGTCTGTTTGGTATGGCTTCATTAGCTCCGTTCCCAACGATCAAGGCGAGTTACATGATC  
CCCCATGTTGTGCAAAAAGCGGTTAGCTCCTTCGGTCTCCGATCGTTGTGAGAAGTAAGTTGGCCGAGTGTAT  
CACTCATGGTTATGGCAGCACTGCATAATTCTCTTACTGTCTGATGCCATCCGTAAGATGCTTTTCTGTGACTGGT  
TACTCAACCAAGTCATTCTGAGAATAGTGTATGCGGCGACCGAGTTGCTCTTGCCCGGCGTCAATACGGGATAATAC  
CGCGCCACATAGCAGAACTTTAAAAGTGCTCATCATTGAAAACGTTCTTCCGGGCGAAAACCTCTCAAGGATCTTAC  
CGCTGTTGAGATCCAGTTCGATGTAACCCACTCGTGCACCCAACTGATCTTCCAGCATCTTTTACTTTTACCAGCGTT  
TCTGGGTGAGCAAAAACAGGAAGGCAAAAATGCCGCAAAAAGGGAATAAGGGCGACACGGAAATGTTGAATACTCAT  
ACTCTTCTTTTTCAATATTATTGAAGCATTATCAGGGTTATTGTCTCATGAGCGGATACATATTTGAATGTATTT  
AGAAAAATAAACAAATAGGGGTTCCGCGCACATTTCCCGAAAAGTGCCACCTGACGTC

MAHHHHHTQVAKKILVTCANPYANGSIHLGHMLEHIQADVWVRYQRMRGHEVNFICADDAHGTPIMLKAQQLGITP  
EQMIGEMSQEHQTDFAFGNISYDNYHSTHSEENRQLSELIYSRLKENGFIKNRTISQLYDPEKGMFLPDRFVKGTC  
KCKSPDQYGDNCEVCGATYSPTLIEPKSVVSGATPVMRDSEHFFDLPSFSEMLQAWTRSGALQEQVANKMQEWF  
SGLQQWDISRDAFYFGFEIPNAPGKYFYVWLDAPIGLMGSFKNLCKDRGDSVSFDEYWKDSTAELYHF  
LGLDIVYF  
LSLFWPAMLEGSNFRKPSNLFVHGYVTVNGAKMSKSRGTFIKASTWLNHFDADSLRYYTAKLSRIDDLNLEDF  
VQRVNADIVNKVVNLSRNAGFINKRFDGVLASELADPQLYKTFTDAAEVI GEAWESREFGKAVREIMALADLANRY  
VDEQAPWVVAKEGRDADLQAICSMGINLFRVLMTYLKPVLPKLTERRAEFLNTELTWDGIQPLLGHKVNPFKALY  
NRIDMRQVEALVEASKEEVKAAAAPVTGPLADDPIQETITFDDFAKVDLRVALIENAEFVEGSDKLLRLTDLGGEK  
RNVFSGIRSAYPDPQALIGRHTIMVANLAPRKMFRGISEGMVMAAGPGGKIDIFLLSPDAGAKPGHQVK-

Figure S10. Structure of the alkyne-TAMRA dye.

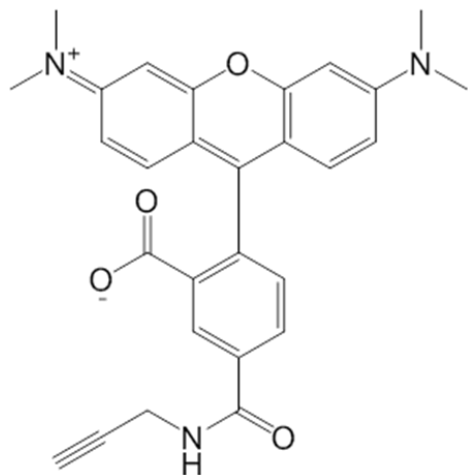

**Figure S11.**

Protein loading controls corresponding to Figure 1(d) of the main text. Cell lysate proteins which were labeled with TAMRA-alkyne dye and electrophoresed on a polyacrylamide SDS gel were subsequently stained with colloidal blue dye to determine the relative abundances of proteins in lysates derived from different labeling conditions (indicated above the gel) for each cell line.

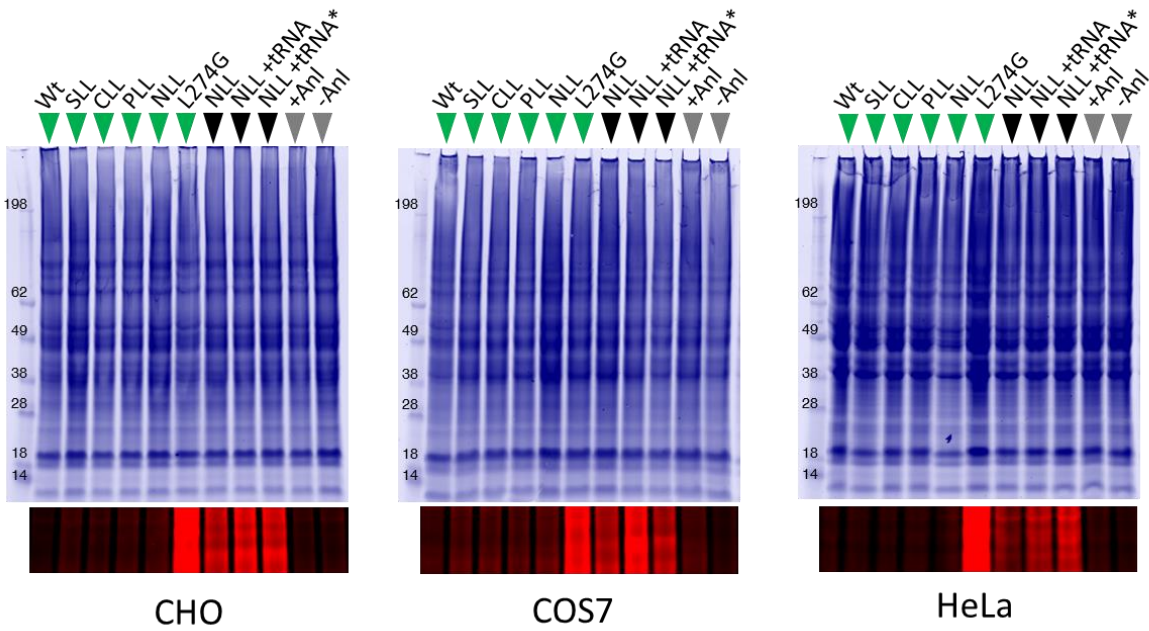

**Figure S12. Selectivity of L274G*Mm*MetRS.** In-gel fluorescence was used as a measure of Anl incorporation into cellular proteins. At a fixed concentration of Met, changes in Anl concentration determine the extent of protein labeling, which depends on the relative rates of activation of Anl and Met by L274G*Mm*MetRS.

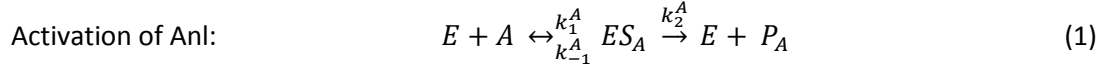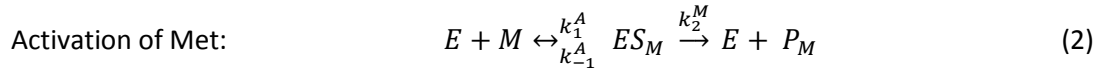

where  $ES_A$  is the complex of L274G*Mm*MetRS with Anl (A) and  $ES_M$  is the complex of L274G*Mm*MetRS with Met (M).  $P_A$  is tRNA<sup>Met</sup> charged with Anl;  $P_M$  is tRNA<sup>Met</sup> charged with Met.

$$\text{Let} \quad K^A = \left(\frac{k_{cat}}{k_M}\right)^{Anl} \quad \text{and} \quad K^M = \left(\frac{k_{cat}}{k_M}\right)^{Met}$$

Because A and M compete for L274G*Mm*MetRS (see Fersht (Eq. 3.44)<sup>9</sup>):

$$\frac{V_A}{V_M} = \frac{A}{M} \frac{K^A}{K^M} \quad (3)$$

where  $V_A$  and  $V_M$  are the rates of activation of Anl and Met, respectively.

For a fixed Anl concentration the total rate of substrate activation by L274G*Mm*MetRS is a constant (C):

$$C = V_A + V_M$$

$$\text{Rearranging (3) gives:} \quad K^A = \frac{V_A}{V_M} \frac{M}{A} K^M$$

$$\text{Eliminating } V_M: \quad K^A = \frac{V_A}{C - V_A} \frac{M}{A} K^M \quad \text{or} \quad V_A = \frac{K^A C}{\frac{M}{A} K^M + K^A} \quad (4)$$

Dividing numerator and denominator by  $K^M$  yields:

$$V_A = \frac{A \left(\frac{K^A}{K^M}\right) C}{M + A \left(\frac{K^A}{K^M}\right)} \quad (5)$$

where  $\left(\frac{K^A}{K^M}\right)$  is the selectivity, C is a constant and the Met and Anl concentrations are known. Measured values of in-gel fluorescence were fit to Equation 5 by least-squares methods at different concentrations of Anl and Met to determine the selectivity of L274G*Mm*MetRS.

The following Matlab functions were used to fit the data from Figure 2A in the main text. The resulting parameter fits yielded a selectivity of 0.2508 and C = 1.089.

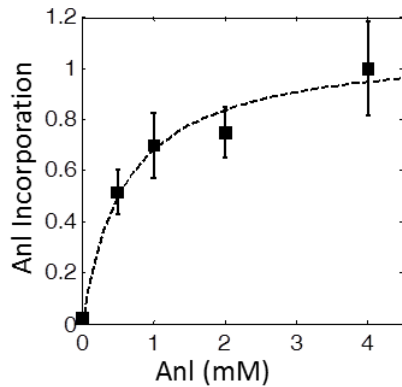

**Figure S12A. Selectivity of L274G*Mm*MetRS.** In-gel fluorescence was used as a measure of AnI incorporation into cellular proteins. At a fixed concentration of Met, changes in AnI concentration determine the extent of protein labeling, which depends on the relative rates of activation of AnI and Met by L274G*Mm*MetRS.

```

-----
function fitfluorescenceR
function m = FF(x , xdata)
for i=1:size(xdata)
m(i) = ((xdata(i)*x(1)*x(2)) / ((0.15+xdata(i)*x(1))));
end
m=m';
end

A=[0; 0.5; 1; 2; 4];
fl=[0.022871044; 0.516731636; 0.699062794; 0.752107911; 1]
err=[0.002135075; 0.086032748; 0.127708537; 0.098922244; 0.183627695];
errorbar(A,fl,err,'ro');

% initial guess for parameters
x0=[0.5 1] % This is the selectivity parameters
% second 1 this is constant C
[x,resnorm, residual,~,exitflag,output]=lsqcurvefit(@FF,x0,A,fl);
hold on
counter=0; for i=0:0.1:4.5, counter=counter+1; II(counter)=i;
F(counter)=(i*0.2508*1.089)/(0.15+i*0.2508);end
plot(II,F)

SStotal = (length(fl)-1) * var(fl);
SSresid=sum(residual.^2);
rsq = 1 - SSresid/SStotal
end
-----

```

We tested the selectivity parameters that we obtained from Figure 2A to compare the predicted and observed AnI incorporation levels at the different Met concentrations used in Figure 2B. The following Matlab functions were used for Figure 2B in the main text. The data in Figure 2B were first normalized so that at a Met concentration of 0.15 mM, the level of AnI incorporation corresponds to that of Figure 2A; the concentration of Met used in Figure 3A is a constant 0.15 mM.

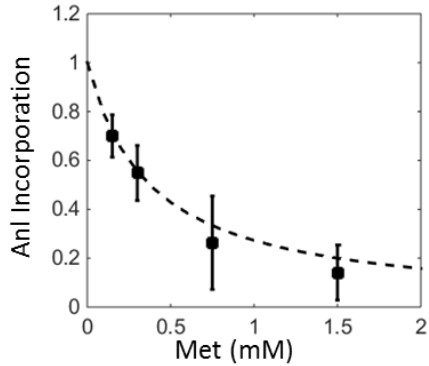

**Figure S12B. Selectivity of L274G*Mm*MetRS.** In-gel fluorescence was used as a measure of AnI incorporation into cellular proteins at a fixed AnI concentration with varying concentrations of Met. Selectivity parameters that were obtained from Figure 2A were used to obtain the predicted AnI incorporation levels shown in dotted line.

```

-----
function fitfluorescencetst
function m = FF(x , xdata)
for i=1:size(xdata)
m(i)=(1.5*x(1)*1)/((xdata(i)+1.5*x(1)))
end
m=m';
end

M=[0.15;    0.3;    0.75;    1.5];
fl=[0.7;    0.548851071;    0.263135683;    0.14119813];
err=[0.086722315;    0.112658654;    0.19100414;    0.11272512];
errorbar(M,fl,err,'ro');

counter=0; for i=0:0.1:2, counter=counter+1; II(counter)=i;
F(counter)=(1.5*0.25)/(i+1.5*0.25);end
plot(II,F)

SStotal = (length(fl)-1) * var(fl);
SSresid=sum(residual.^2);
rsq = 1 - SSresid/SStotal
end
-----

```



**Figure S13. The pMaRSC vector for expression of L274G*Mm*MetRS and mCherry proteins.** The cassette inserted into the *Nhe*1/*Xho*1 restriction sites of the pcDNA3.1 plasmids is color coded corresponding to highlighted sequences. Kozak sequence is highlighted in light blue. The pMaRS plasmid is the same construct as pMaRSL274G, and below is the sequence for pMaRSC which contains a T2A-Mcherry sequence appended to the C-terminal of L274G*Mm*MetRS. This construct is available through Addgene.

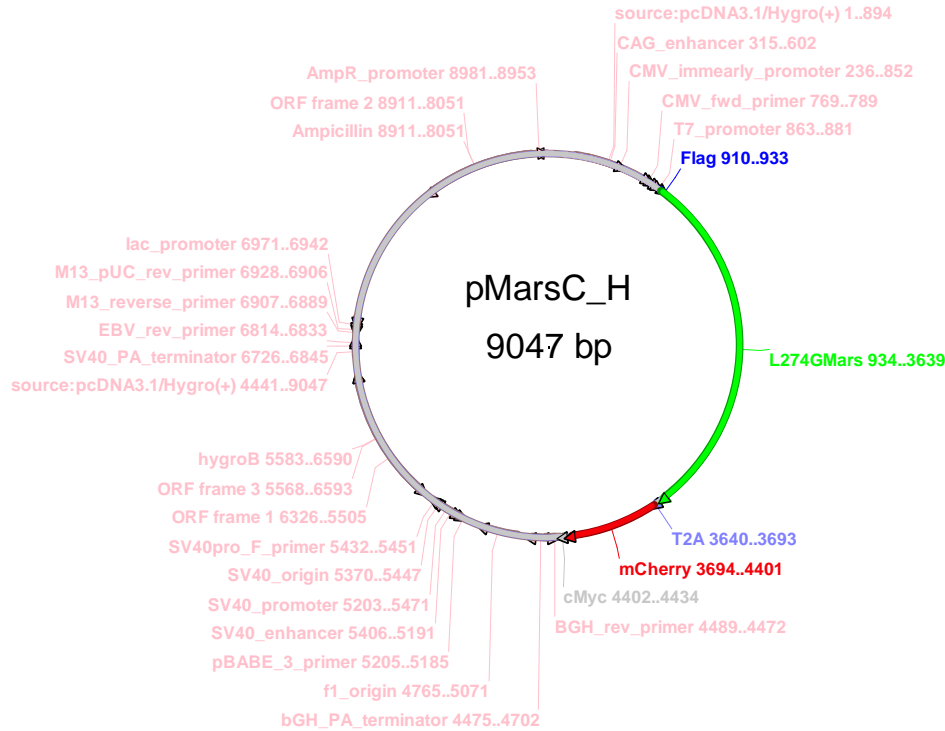

**Nhe1**Flag-tag**MaRS\***T2A**Mcherry**Myc-tag**Xho1**

GACGGATCGGGAGATCTCCCAGATCCCCTATGGTGCACCTCTCAGTACAATCTGCTCTGATGCCGCATAGTTAAGCCAG  
TATCTGCTCCCTGCTTGTGTGTTGGAGGTCGCTGAGTAGTGCGCGAGCAAAATTTAAGCTACAACAAGGCAAGGCTT  
GACCGACAATTGCATGAAGAATCTGCTTAGGGTTAGGCGTTTTGCGCTGCTTCGCGATGTACGGGCCAGATATACGC  
GTTGACATTGATTATTGACTAGTTATTAATAGTAATCAATTACGGGGTCATTAGTTTCATAGCCCATATATGGAGTTC  
CGCGTTACATAACTTACGGTAAATGGCCCGCTGGCTGACCGCCCAACGACCCCCGCCATTGACGTCAATAATGAC  
GTATGTTCCCATAGTAACGCCAATAGGGACTTTCCATTGACGTCAATGGGTGGAGTATTTACGGTAAACTGCCCACT  
TGGCAGTACATCAAGTGTATCATATGCCAAGTACGCCCCCTATTGACGTCAATGACGGTAAATGGCCCGCCTGGCAT  
TATGCCCAGTACATGACCTTATGGGACTTTCTACTTGGCAGTACATCTACGTATTAGTCATCGCTATTACCATGGT  
GATGCGGTTTTGGCAGTACATCAATGGGCGTGGATAGCGGTTTTGACTCACGGGGATTTCCAAGTCTCCACCCCATTG  
ACGTCAATGGGAGTTTTGTTTTGGCACCAAAATCAACGGGACTTTCCAAAATGTCGTAACAACCTCCGCCCCATTGACG  
CAAATGGGCGGTAGGCGGTGTACGGTGGGAGGTCTATATAAGCAGAGCTCTCTGGCTAACTAGAGAACCCTACTGCTTA  
CTGGCTTATCGAAATTAATACGACTCACTATAGGGAGACCCAAGCTGGCTAGCGCCACCATGGATTACAAGGATGAT  
GATGATAAGATGAGACTGTTTCGTGAGCGAGGGTTCCCGGGGAGCCTGCCCGTGCTGGCTGCGGGCCGCGAGGGCCCG  
GGGTCGGGCGGAGCTGCTCATCAGCACCGTAGGCCCGAAGAGTGTGTGGTACCATTTCCTTACCCGGCCTAAGGTCC  
CTGTCTTGAGCTGGATAGTGGCAACTACCTCTTCTCTGCTAGTGAATCTGCCGATATTTTTTTCTGTTATGTGGC  
TGGGAACAAGATGATCTCACCAACCAGTGGCTGGAATGGGAGGCAACAGAAGTGCAGCCAGTTCTGTCTGCTGCCCT  
ACACTGTCTAGTGGTTCAAGGCAAGAAAGGGGAAGATATACTTGGCCCACTTCGGAGAGTCTGACTCACATTGATC  
ACAGCTTGAGTCGTCAAACTGTCCTTTCTGGCTGGGGACACAGAATCTCTAGCTGACATTGTTTTGTGGGGAGCA  
CTGTATCCTTTACTGCAAGACCCAGCTTACCTCCCTGAGGAGTTGGGTGCCCTGCAAAGTTGGTTCCAGACACTGAG  
TACCCAGGAACCGTGTGACGAGCTGCAGAGACGGTGTAAAACAGCAGGGTGTCTTGGCACTTCGTCTGTACCTCC  
AGAAACAGCCACAGCCTCAGCCCCGCTCCTGAGGGGAGAAGTGTGAGCAACGAGCTGGAGGAAGAGGAAGTGGCT  
ACCTTGTCTGAGGAGGACATCGTTACAGCTGTTGCCCGTGGGAGAAGGGTCTGGAAAGCCTGCCTCCGCTAAAGCT

CCAGCAGCATCCAGTGTTCCTGTGCCTGGAGAGAGGAATGTTCTCATCACCAGTGCCGGACCCTATGTCAACAATG  
TCCCCACCTTGAAACATCATTGGCTGTGTGCTCAGTGTGATGTCTTTGCAAGGTATTGTGCGCTTCGCCAGTGG  
AATACCCTCTATCTGTGTGGTACAGATGAGTATGGTACTGCGACAGAGACCAAGGCCATGGAGGAGGGCCTAACCC  
ACGGGAAATCTGTGACAAGTACCATGCCATCCATGCTGACATCTACCGCTGGTTCGGCATATCGTTCGATACTTTCCG  
GGCGCACTACCACTCCTCAGCAGACCAAAATCACCCAGGACATCTCCAGAGGTTGCTGACCCGGGGGTTTTGTGCTG  
CGAGATACTGTGGAGCAGCTTCGGTGTGAGCGGTGTGCACGTTTTCTGGCTGACCGCTTTGTGGAGGGTGTGTGTC  
CTTCTGTGGCTATGAAGAGGCCCGAGGTGACCAGTGTGACAGGTGTGGCAAGCTCATCAATGCCATTGAGCTCAAGA  
AACCACAGTGCAAAATCTGCCGCTCCTGCCCTGTGGTGGAGTCTCACAGCACCTGTTTCTAGACTTGCCTAAGTTG  
GAAAAGCGTCTGGAGGACTGGTTGGGGAAAGACAGTGCCTGGCAGTGAAGTGGACACCCAATGCCAGGTTCAATTATACG  
TTCCTGGCTTCGAGATGGCCTCAAGCCACGATGCATCACCAGAGACCTCAAATGGGGAACGCCTGTGCCCTTGGAAG  
GTTTTGAGGACAAGGTATTTACGTCTGGTTTGTGTCTACTACTTTGGCTACGTGTCCATCAGCAGCAACTACACAGAC  
CAATGGGAGAAATGGTGAAGAACCAGAACAAGTGGACCTTTACCAGTTCATGGCCAAAGACAATGTTCCCTTCCA  
TGGCTTGGTCTTTCCGTGTTTCAGTCTTAGGAGCTGAGGACAACACTACACCCTGGTCAAGCACATCATTGCTACAGAGT  
ACCTGAACATGAGGATGGGAAATTCTCTAAGAGCCGGGGCATAGGAGTGTGTTGGAGACATGGCCAAGGATACAGGA  
ATCCCTGCTGACATCTGGCGATTCTATCTGCTATAACATTGGCCCTGAGGGCCAGGACAGTGCCTTCTCCTGGACAGA  
CTTGTGATTAAAAACAATTCTGAGCTGCTCAACAACCTGGGCAACTTCATCAACAGAGCTGGCATGTTTGTGTTCTA  
AGTTTTTTGGCGGTTGTGTGCCTGAGATGGCGCTAACCCCTGATGACAGACGCCTGGTGGCCCATGTCTCTTGGGAA  
CTCCAGCACTATCACCAGCTGTTGGAAAAGGTTCCGGATCCGGGATGCCTTGCAGCAGTATCCTCACCATATCTCGCCA  
TGGCAACCAATACATTCAAGTGAATGAGCCCTGGAAACGGATTAAAGGTGGTGAAGTGGACAGGCAGCGGGCAGGCA  
CAGTGAAGGCATGGCAGTGAACATGGCTGCCTTGTGTCTGTGATGCTGCAGCCATACATGCCACAGTCAAGTCT  
ACCATCCAGACCCAGCTGCAGCTCCCACCTGCAGCCTGCCGCATCCTTGCACAAGCTTCATTTGTACCTTGCCAGC  
AGGCCACCGAATTGGCACAGTCAAGTCTTTGTTCCAAAACCTGGAAAATGACCAGATTGAAAATTTGAGGCAGCGCT  
TTGGAGGGGGTCAAGGCTAAAGGCTCCCCAAGCCAGCAGCTGTGGAGGCAGTTACAGCAGCAGGCTCGCAGCACATA  
CAAACGCTGACGGATGAGGTGACCAAGCAGGGCAACGTCGTCCGGGAACCTGAAAGCACAGAAGGCAGACAAGAACCA  
GGTTGCTGCAGAGGTGGCTAAACTCTTGATCTAAAGAAAACAGTTGGCTTTGGCTGAGGGGAAACCCATTGAAACTC  
CTAAAGGCAAGAAGAAAAAGGAAGGGAGAGGAAGCCTCCTAACATGCGGTGACGTGGAGGAGAACCAGGACCAATG  
GTGAGCAAGGGCGAGGAGGATAACATGGCCATCATCAAGGAGTTCATGCGCTTCAAGGTGCACATGGAGGGCTCCGT  
GAACGGCCACGAGTTCGAGATCGAGGGCGAGGGCGAGGGCCGCCCTACGAGGGCACCCAGACCCGCAAGCTGAAGG  
TGACCAAGGGTGGCCCCCTGCCCTTCGCCCTGGGACATCCTGTCCCCCTCAGTTCATGTACGGCTCCAAGGCCTACGTT  
AAGCACCCGCGGACATCCCCGACTACTTGAAGCTGTCTTCCCCGAGGGCTTCAAGTGGGAGCGGCTGATGAACCTT  
CGAGGACGGCGGGCGTGGTGACCGTGACCCAGGACTCCTCCCTGCAGGACGGCGAGTTCATCTACAAGGTGAAGCTGC  
GCGGCACCAACTTCCCCTCCGACGGCCCCGTAATGCAGAAGAAGACCATGGGCTGGGAGGCCTCCTCCGAGCGGATG  
TACCCCGAGGACGGCGCCCTGAAGGGCGAGATCAAGCAGAGGCTGAAGCTGAAGGACGGCGGCCACTACGACGCTGA  
GGTCAAGACCACCTACAAGGCCAAGAAGCCCGTGAGCTGCCCGGCGCCTACAACGTCAACATCAAGTTGGACATCA  
CCTCCCACAACGAGGACTACACCATCGTGGAAACAGTACGAACGCGCCGAGGGCCGCCACTCCACCGGCGGCATGGAC  
GAGCTGTACAAGGAACAAAACCTTATTTCTGAAGAAGATCTGTAACTCGAGTCTAGAGGGCCCGTTTTAAACCCGCTG  
ATCAGCCTCGACTGTGCCTTCTAGTTGCCAGCCATCTGTTGTTTGGCCCTCCCCCGTGCCTTCTTGCACCTGGAAG  
GTGCCACTCCCCTGTCTTTTCTAATAAAAATGAGGAAATTGCATCGCATTGTCTGAGTAGGTGTCAATTCTATTCTG  
GGGGGTGGGGTGGGGCAGGACAGCAAGGGGGAGGATTGGGAAGACAATAGCAGGCATGCTGGGGATGCGGTGGGCTC  
TATGGCTTCTGAGGCGGAAAGAACCAGCTGGGGCTTAGGGGGTATCCCCACGCGCCCTGTAGCGGCGCATTAAAGCG  
CGGCGGGTGTGGTGGTTACGCGCAGCGTGACCGCTACACTTGCCAGCGCCCTAGCGCCCGCTCCTTTTCGCTTTCTTC  
CCTTCTTTCTCGCCACGTTCCGCCGGCTTTCCCCGTCAAGCTCTAAATCGGGGGCTCCCTTTAGGGTTCGGATTTAG  
TGCTTTACGGCACCTCGACCCCAAAAACCTTGATTAGGGTGTGTTTACGTAAGTGGGCCATCGCCCTGATAGACGG  
TTTTTTCGCCCTTTGACGTTGGAGTCCACGTTCTTTAATAGTGGACTCTTGTTCAAAACCTGGAACAACACTCAACCCT  
ATCTCGGTCTATTCTTTTGAATTTATAAGGGATTTTGGCGATTTCCGGCCTATTGGTTAAAAAATGAGCTGATTTAACA  
AAAATTTAACGCGAATTAATTCTGTGGAATGTGTGTGAGTGGTGGAAAGTCCCAGGCTCCCAGCAGGCAGGAGTA  
AAGTATGCAAAGCATGCATCTCAATTAGTCAGCAACCAGGTGTGGAAAGTCCCAGGCTCCCAGCAGGCAGGAGTA  
TGCAAAGCATGCATCTCAATTAGTCAGCAACCAGGTGTGGAAAGTCCCAGGCTCCCAGCAGGCAGGAGTA  
AGTTCGCCCCATTCTCCGCCCCATGGCTGACTAATTTTTTTTTATTTATGAGAGGCGGAGGCCGCTCTGCCTCTGA  
GCTATTCCAGAAGTAGTGAGGAGGCTTTTTTGGAGGCCTAGGCTTTTGCAAAAGCTCCCAGGAGCTTGTATATCCA  
TTTTTCGGATCTGATCAAGAGACAGGATGAGGATCGTTTTCGCATGATTGAACAAGATGGATTGCACGCAGGTTCTCCG  
GCCGCTTGGGTGGAGAGGCTATTCCGGCTATGACTGGGCACAACAGACAATCGGCTGCTCTGATGCCGCGGTGTTCCG  
GCTGTGACGCGAGGGGCGCCCGGTTCTTTTTGTCAAGACCGACCTGTCCGGTGCCTGAATGAACTGCAGGACGAGG  
CAGCGCGGCTATCGTGGCTGGCCACGACGGGCGTTCTTTCGCGAGCTGTGCTCGACGTTGTCACTGAAGCGGGAAGG  
GACTGGCTGCTATTGGGCGAAGTGCCGGGGCAGGATCTCCTGTGATCTCACCTTGTCTCTGCCGAGAAAGTATCCAT  
CATGGCTGATGCAATGCGGCGGCTGCATACGCTTGTATCCGGCTACCTGCCATTTCGACCACCAAGCGAAACATCGCA  
TCGAGCGAGCACGTACTCGGATGGAAGCCGGTCTTGTGATCAGGATGATCTGGACGAAGAGCATCAGGGGCTCGCG



**Figure S14. The pMarlox vector for expression of L274GMmMetRS and mCherry proteins.** The cassette inserted into the Nhe1/Xho1 restriction sites of the pcDNA3.1 plasmids is color coded corresponding to highlighted sequences. Kozak sequence is highlighted in blue. The loxP sequences and transcriptional stop sequence are inserted into the Nhe1 site of this plasmid, thereby introducing a second Nhe1 site.

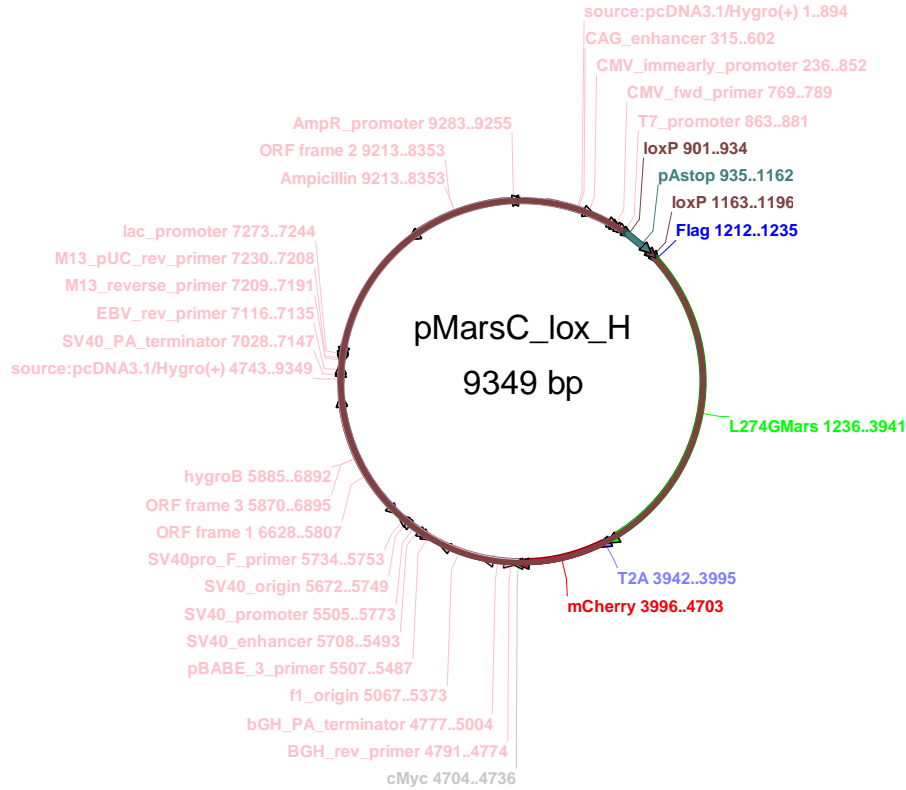

Nhe1 loxP stop loxP Flag MaRS\* T2A Mcherry Myc Xho1

```
GACGGATCGGGAGATCTCCCCTATGGTGCCTCTCAGTACAATCTGCTCTGATGCCGCATAGTTAAGCCAG
TATCTGCTCCCTGCTTGTGTGTTGGAGGTCGCTGAGTAGTGCGCGAGCAAAATTTAAGCTACAACAAGGCAAGGCTT
GACCGACAATTGCATGAAGAATCTGCTTAGGGTTAGGCGTTTTGCGCTGCTTCGCGATGTACGGGCCAGATATACGC
GTTGACATTGATTATTGACTAGTTATTAATAGTAATCAATTACGGGGTCATTAGTTTCATAGCCCATATATGGAGTTC
CGCGTTACATAACTTACGGTAAATGGCCCGCTGGCTGACCGCCCAACGACCCCGCCATTGACGTCAATAATGAC
GTATGTTCCCATAGTAACGCCAATAGGGACTTTCCATTGACGTCAATGGGTGGAGTATTTACGGTAAACTGCCCACT
TGGCAGTACATCAAGTGTATCATATGCCAAGTACGGCCCTATTGACGTCAATGACGGTAAATGGCCCGCTGGCAT
TATGCCAGTACATGACCTTATGGGACTTTCTACTTGGCAGTACATCTACGTATTAGTCATCGCTATTACCATGGT
GATGCGGTTTTGGCAGTACATCAATGGGCGTGGATAGCGGTTTTGACTCACGGGGATTTCCAAGTCTCCACCCATTG
ACGTCAATGGGAGTTTTGTTTTGGCACCAAAATCAACGGGACTTTCCAAAATGTCGTAACAACCTCCGCCCCATTGACG
CAAATGGGCGGTAGGCGTGTACGGTGGGAGGTCTATATAAGCAGAGCTCTCTGGCTAACTAGAGAACCCACTGCTTA
CTGGCTTATCGAAATTAATACGACTCACTATAGGGAGACCCAAGCTGGCTAGCATAACTTCGTATAGCATAACATTAT
ACGAAGTTATCGACTGTGCCTTCTAGTTGCCAGCCATCTGTTGTTTTGCCCTCCCGCGTGCCTTCCCTTGACCCCTGGA
AGGTGCCACTCCCCTGTCCTTTTCCCTAATAAAATGAGGAAATTGCATCGCATTGTCTGAGTAGGTGTCATTCTATTC
TGGGGGGTGGGGTGGGGCAGGACAGCAAGGGGGAGGATTGGGAAGACAATAGCAGGCATGCTGGGGATGCGGTGGGC
TCTATGGATAACTTCGTATAGCATAACATTATACGAAGTTATGCTAGCGCCACCATGGATTACAAGGATGATGATGA
TAAGATGAGACTGTTTCGTGAGCGAGGGTTCCCCGGGGAGCCTGCCCGTGTGGCTGCGGCCGCGAGGGCCCGGGTCC
```

GGGCGGAGCTGCTCATCAGCACCGTAGGCCCGAAGAGTGTGTGGTACCATTCCCTTACCCGGCCTAAGGTCCCTGTCT  
TTGCAGCTGGATAGTGGCAACTACCTCTTCTCTGCTAGTGAATCTGCCGATATTTTTTCTGTTATGTGGCTGGGA  
ACAAGATGATCTACCAACCAGTGGCTGGAATGGGAGGCAACAGAAGTGCAGCCAGTTCTGTCTGCTGCCCTACACT  
GTCTAGTGGTTCAAGGCAAGAAAGGGGAAGATATACTTGGCCCACTTCGGAGAGTCTGACTCACATTGATCACAGC  
TTGAGTCGTCAAAACTGTCTTTTCTGGCTGGGGACACAGAATCTCTAGCTGACATTGTTTTGTGGGGAGCACTGTA  
TCCTTTACTGCAAGACCCAGCTTACCTCCCTGAGGAGTTGGGTGCCCTGCAAAGTTGGTTCCAGACACTGAGTACCC  
AGGAACCGTGTGAGGAGCTGCAGAGACGGTGTAAAACAGCAGGGTGTCTGGCACTTCGTCTGTACCTCCAGAAA  
CAGCCACAGCCTCAGCCCCCGCCTCCTGAGGGGAGAAGTGTGCAACGAGCTGGAGGAAGAGGAAGTGGCTACCTT  
GTCTGAGGAGGACATCGTTACAGCTGTTGCCGCGTGGGAGAAGGGTCTGGAAAGCCTGCCTCCGCTAAAGCTCCAGC  
AGCATCCAGTGTGCTGTGCTGGAGAGAGGAATGTTCTCATCACCAGTGCCGGACCCATGTCACAACATGTCCCC  
CACCTTGGAAACATCATTGGCTGTGTGCTCAGTGTGATGCTTTGCAAGGTATTGTGCCTTCGCCAGTGGAAATAC  
CCTCTATCTGTGTGGTACAGATGAGTATGGTACTGCGACAGAGACCAAGGCCATGGAGGAGGGCCTAACCCACGGG  
AAATCTGTGACAAGTACCATGCCATCCATGCTGACATCTACCCTGGTTCCGCATATCGTTCCGATACTTTCGGGCGC  
ACTACCCTCCTCAGCAGACCAAAATCACCCAGGACATCTCCAGAGGTTGCTGACCCGGGGGTTTTGTGCTGCGAGA  
TACTGTGGAGCAGCTTCGGTGTGAGCGGTGTGCACGTTTCTGGCTGACCGCTTTGTGGAGGGTGTGTGTCCCTTCT  
GTGGCTATGAAGAGGCCCGAGGTGACCAGTGTGACAGGTGTGGCAAGCTCATCAATGCCATTGAGCTCAAGAAACCA  
CAGTGCAAAATCTGCCGCTCCTGCCCTGTGGTGGAGTCTCACAGCACCTGTTTCTAGACTTGCCTAAGTTGGAAAA  
GCGTCTGGAGGACTGGTTGGGGAAGACAGTGCCTGGCAGTACTGGACACCCAATGCCAGGTTTATTATACGTTCTT  
GGCTTCGAGATGGCCTCAAGCCACGATGCATCACCAGAGACCTCAAATGGGGAACGCCTGTGCCCTTGGAAAGTTTT  
GAGGACAAGGTATTTTACGTCTGGTTTGTGCTACTATTGGCTACGTGTCCATCACAGCCAATACACAGACCAATG  
GGAGAAATGGTGGAAAGAACCAGAACAAGTGGACCTTTACCAGTTCATGGCCAAAGACAATGTTCCCTTCCATGGCT  
TGGTCTTTCCGTGTTTTCAGTCTTAGGAGCTGAGGACAACCTACACCCTGGTCAAGCACATCATTGCTACAGAGTACCTG  
AACTATGAGGATGGGAAATTTCTTAAGAGCCGGGGCATAGGAGTGTGGAGACATGGCCAAGGATACAGGAATCCC  
TGCTGACATCTGGCGATTCTATCTGCTATACATTCGGCCTGAGGGCCAGGACAGTGCCTTCTCCTGGACAGACTTGT  
TGATTAATAACAATTTGAGCTGCTCAACAACCTGGGCAACTTCATCAACAGAGCTGGCATGTTTGTCTTAAGTTT  
TTTGGCGGTTGTGTGCCTGAGATGGCGCTAACCCCTGATGACAGACGCCTGGTGGCCCATGTCTCTTGGGAACTCCA  
GCACTATCACCAGCTGTTGGAAAAGGTTTCGGATCCGGGATGCCTTGCAGCATCCTCACCATATCTCGCCATGGCA  
ACCAATACATTCAAGTGAATGAGCCCTGGAAACGGATTAAAGGTGGTGGAGATGGACAGGCAGCGGGCAGGCACAGTG  
ACAGGCATGGCAGTGAACATGGCTGCCTTGCTGTCTGTGATGCTGCAGCCATACATGCCACAGTCACTTACCAT  
CCAGACCCAGCTGCAGCTCCACCTGCAGCCTGCCGCATCCTTGCCACAAGCTTCATTTGTACCTTGCCAGCAGGCC  
ACCGAATTGGCACAGTCACTCTTTGTTCCAAAAGTGGAAAATGACCAGATTGAAAATTTGAGGCAGCGCTTTGGA  
GGGGGTGAGGCTAAAGGCTCCCCAAGCCAGCAGCTGTGGAGGCAGTTACAGCAGCAGGCTCGCAGCACATACAAAC  
GCTGACGGATGAGGTGACCAAGCAGGGCAACGTCGTCCGGGAAGTGAAGACACAGAAGGCAGACAAGAACCAGGTTG  
CTGCAGAGGTGGCTAAACTCTTGGATCTAAAGAAACAGTTGGCTTTGGCTGAGGGGAAACCCATTGAAACTCCTAAA  
GGCAAGAAGAAAAAGGAAGGGAGAGGAAGCCTCTAAACATGCGGTGACGTGGAGGAGAACCAGGACCAATGGTGAG  
CAAGGGCGAGGAGGATAACATGGCCATCATCAAGGAGTTCATGCGCTTCAAGGTGCACATGGAGGGCTCCGTGAACG  
GCCACGAGTTCGAGATCGAGGGCGAGGGCGAGGGCCGCCCTACGAGGGCACCCAGACCGCCAAGCTGAAGGTGACC  
AAGGGTGGCCCCCTGCCCTTCGCCTGGGACATCCTGTCCCCTCAGTTCATGTACGGCTCCAAGGCCTACGTGAAGCA  
CCCCGCCGACATCCCCGACTACTTGAAGCTGTCTTCCCCGAGGGCTTCAAGTGGGAGCGCGTGATGAACTTCGAGG  
ACGGCGGGCGTGGTGACCGTGACCCAGGACTCCTCCCTGCAGGACGGCGAGTTCATCTACAAGGTGAAGCTGCGCGGC  
ACCAACTTCCCCTCCGACGGCCCCGTAATGCAGAAGAAGACCATGGGCTGGGAGGCCTCCTCCGAGCGGATGTACCC  
CGAGGACGGCGCCCTGAAGGGCGAGATCAAGCAGAGGCTGAAGCTGAAGGACGGCGGCCACTACGACGCTGAGGTCA  
AGACCACCTACAAGGCCAAGAAGCCCGTGCAGCTGCCCGGCGCCTACAACGTCAACATCAAGTTGGACATCACCTCC  
CACAACGAGGACTACACCATCGTGGAAACAGTACGAACGCGCCGAGGGCCGCCACTCCACCGGCGGCATGGACGAGCT  
GTACAAGGAACAAAAAATTTATTTCTGAAGAAGATCTGTAACTCGAGTCTAGAGGGCCCCGTTTAAACCCGCTGATCAG  
CCTCGACTGTGCCTTCTAGTTGCCAGCCATCTGTTGTTTGGCCCTCCCCCGTGCCTTCCCTTGACCCTGGAAGGTGCC  
ACTCCCCTGTCTTTTCTAATAAAAATGAGGAAATTCATCGCATTGTCTGAGTAGGTGTCACTTCTATTCTGGGGGG  
TGGGGTGGGGCAGGACAGCAAGGGGGAGGATTGGGAAGACAATAGCAGGCATGCTGGGGATGCGGTGGGCTCTATGG  
CTTCTGAGGCGGAAAGAACCAGCTGGGGCTCTAGGGGTATCCCCACGCGCCCTGTAGCGGCGCATTAAGCGCGGCG

GGTGTGGTGGTTACGCGCAGCGTGACCGCTACACTTGCCAGCGCCCTAGCGCCCGCTCCTTTTCGCTTTCTTCCCTTC  
CTTTCTCGCCACGTTTCGCCGGCTTTCCCGTCAAGCTCTAAATCGGGGGCTCCCTTTAGGGTTCCGATTTAGTGCTT  
TACGGCACCTCGACCCCAAAAACTTGATTAGGGTGATGGTTCACGTAGTGGGCCATCGCCCTGATAGACGGTTTTT  
CGCCCTTTGACGTTGGAGTCCACGTTCTTTAATAGTGGACTCTTGTTCCAAACTGGAACAACACTCAACCCTATCTC  
GGTCTATTCTTTTATTATAAGGGATTTTGGCGATTTTCGGCCTATTGGTTAAAAAATGAGCTGATTTAACAAAAAT  
TTAACGCGAATTAATTCTGTGGAATGTGTGTCAGTTAGGGTGTGGAAAGTCCCCAGGCTCCCCAGCAGGCAGAAGTA  
TGCAAAGCATGCATCTCAATTAGTCAGCAACCAGGTGTGGAAAGTCCCCAGGCTCCCCAGCAGGCAGAAGTATGCAA  
AGCATGCATCTCAATTAGTCAGCAACCATAGTCCCGCCCTAACTCCGCCCCTAACTCCGCCCCTAACTCCGCCCAGTTC  
CGCCATTCTCCGCCCCATGGCTGACTAATTTTTTTTTATTTATGAGAGGGCCGAGGCCGCCTCTGCCTCTGAGCTAT  
TCCAGAAGTAGTGAGGAGGCTTTTTTGGAGGCCTAGGCTTTTGCAAAAAGCTCCCGGGAGCTTGTATATCCATTTTC  
GGATCTGATCAAGAGACAGGATGAGGATCGTTTTCGCATGATTGAACAAGATGGATTGCACGCAGGTTCTCCGGCCGC  
TTGGGTGGAGAGGCTATTCGGCTATGACTGGGCACAACAGACAATCGGCTGCTCTGATGCCGCCGTGTTCCGGCTGT  
CAGCGCAGGGGCGCCCGGTTCTTTTTGTCAAGACCGACCTGTCCGGTGCCTGAATGAACTGCAGGACGAGGCAGCG  
CGGCTATCGTGGCTGGCCACGACGGGCGTTCCTTGCGCAGCTGTGCTCGACGTTGTCACTGAAGCGGGAAGGGACTG  
GCTGCTATTGGGCGAAGTGCCGGGGCAGGATCTCCTGTCTACCTTGCTCCTGCCGAGAAAGTATCCATCATGG  
CTGATGCAATGCGGCGGCTGCATACGCTTGATCCGGCTACCTGCCATTTCGACCACCAAGCGAAACATCGCATCGAG  
CGAGCACGTAICTCGGATGGAAGCCGGTCTTGTGATCAGGATGATCTGGACGAAGAGCATCAGGGGCTCGCGCCAGC  
CGAACTGTTCCGACAGGCTCAAGGCGCGCATGCCCGACGGCGAGGATCTCGTCGTGACCCATGGCGATGCCTGCTTGC  
CGAATATCATGGTGGAAAATGGCCGCTTTTCTGGATTATCGACTGTGGCCGGCTGGGTGTGGCGGACCGCTATCAG  
GACATAGCGTTGGCTACCCGTGATATTGCTGAAGAGCTTGGCGGCGAATGGGCTGACCGCTTCTCTGCTGCTTTACGG  
TATCGCCGCTCCCGATTTCGACGCGCATCGCCTTCTATCGCCTTCTTGACGAGTTCTTCTGAGCGGGACTCTGGGGTT  
CGAAATGACCGACCAAGCGACGCCAACCTGCCATCACGAGATTTGATTCCACCGCCGCCTTCTATGAAAGGTTGG  
GCTTCGGAATCGTTTTCCGGGACGCGGGCTGGATGATCCTCCAGCGCGGGGATCTCATGCTGGAGTTCTTCGCCAC  
CCCAACTTGTTTTATTGACGCTTATAATGGTTACAAATAAAGCAATAGCATCACAAATTTACAAATAAAGCATTTTT  
TTCCTGCTGCTTAGTTGTGGTTTTGTCCAAACTCATCAATGTATCTTATCATGTCTGTATAACCGTCGACCTCTAGCT  
AGAGCTTGGCGTAATCATGGTCATAGCTGTTTCTGTGTGAAATTGTTATCCGCTCACAATTCACACAACATACGA  
GCCGGAAGCATAAAGTGTAAGCCTGGGGTGCCTAATGAGTGAGCTAACTCACATTAATTGCGTTGCGCTCACTGCC  
CGTTTTCCAGTCGGGAAACCTGTGCTGCCAGCTGCATTAATGAATCGGCCAACGCGCGGGGAGAGGCGGTTTTGCGTA  
TTGGGCGCTCTTCCGCTTCTCGCTCACTGACTCGCTGCGCTCGGTCGTTCCGGCTGCGGCGAGCGGTATCAGCTCAC  
TCAAAGGCGGTAATACGGTTATCCACAGAATCAGGGGATAACGCAGGAAAGAACATGTGAGCAAAAGGCCAGCAAAA  
GGCCAGGAACCGTAAAAAGGCCGCGTTGCTGGCGTTTTTCCATAGGCTCCGCCCCCTGACGAGCATCACAAAATC  
GACGCTCAAGTCAGAGGTGGCGAAACCCGACAGGACTATAAAGATACCAGGCGTTTTCCCTGGAAGCTCCCTCGTG  
CGCTCTCCTGTTCCGACCCTGCCGCTTACCGGATACCTGTCCGCCTTTCTCCCTTCGGGAAGCGTGGCGCTTTCTCA  
TAGCTCACGCTGTAGGTATCTCAGTTCGGTGTAGGTCGTTCCGCTCCAAGCTGGGCTGTGTGCACGAACCCCCCGTTC  
AGCCCGACCGCTGCGCCTTATCCGGTAACCTATCGTCTTGAGTCCAACCCGGTAAGACACGACTTATCGCCACTGGCA  
GCAGCCACTGGTAACAGGATTAGCAGAGCGAGGTATGTAGGCGGTGCTACAGAGTTCTTGAAGTGGTGGCCTAACTA  
CGGCTACACTAGAAGAACAGTATTTGGTATCTGCGCTCTGCTGAAGCCAGTTACCTTCGGAAAAAGAGTTGGTAGCT  
CTTGATCCGGCAAAACAAACCACCGCTGGTAGCGGTTTTTTTTGTTTGAAGCAGCAGATTACGCGCAGAAAAAAGGA  
TCTCAAGAAGATCCTTTGATCTTTTCTACGGGGTCTGACGCTCAGTGAACGAAAACCTCACGTTAAGGGATTTTGGT  
CATGAGATTATCAAAAAGGATCTTACCTAGATCCTTTTAAATTA AAAATGAAGTTTTAAATCAATCTAAAGTATAT  
ATGAGTAAACTTGGTCTGACAGTTACCAATGCTTAATCAGTGAGGCACCTATCTCAGCGATCTGTCTATTTTCGTTCA  
TCCATAGTTGCCTGACTCCCCGTCGTGTAGATAACTACGATACGGGAGGGCTTACCATCTGGCCCCAGTGCTGCAAT  
GATACCGCGAGACCCACGCTCACCGGCTCCAGATTTATCAGCAATAAACCAGCCAGCCGGAAGGGCCGAGCGCAGAA  
GTGGTCTGCAACTTTATCCGCCTCCATCCAGTCTATTAATTGTTGCCGGGAAGCTAGAGTAAGTAGTTCCGCCAGTT  
AATAGTTTGCGCAACGTTGTTGCCATTGCTACAGGCATCGTGGTGTACGCTCGTCTGTTGGTATGGCTTCATTTCAG  
CTCCGGTTCCCAACGATCAAGGCGAGTTACATGATCCCCATGTTGTGCAAAAAGCGGTTAGCTCCTTCGGTCCCTC  
CGATCGTTGTGAGAAGTAAGTTGGCCGAGTGTATCACTCATGGTTATGGCAGCACTGCATAATTCTCTTACTGTCTC  
ATGCCATCCGTAAGATGCTTTTTCTGTGACTGGTGAGTACTCAACCAAGTCATTCTGAGAATAGTGTATGCGGCGACC  
GAGTTGCTCTTGCCCGCGTCAATACGGGATAATACCGCGCCACATAGCAGAACTTTAAAAGTGCTCATCATTGGAA

AACGTTCTTCGGGGCGAAAACCTCTCAAGGATCTTACCGCTGTTGAGATCCAGTTCGATGTAACCCACTCGTGCACCC  
AACTGATCTTCAGCATCTTTTACTTTTACCAGCGTTTCTGGGTGAGCAAAAACAGGAAGGCAAAATGCCGCAAAAA  
GGGAATAAGGGCGACACGGAAATGTTGAATACTCATACTCTTCTTTTTTCAATATTATTGAAGCATTATCAGGGTT  
ATTGTCTCATGAGCGGATACATATTTGAATGTATTTAGAAAAATAAACAAATAGGGGTTCCGCGCACATTTCCCCGA  
AAAGTGCCACCTGACGTC

MDYKDDDDKMRLFVSEGPSGLPVLAAAARARGRAELLISTVGPPEECVVPFLTRPKVPVLQLDSGNYLFSASAICRY  
FFLLCGWEQDDL TNQWLEWEATELQPVLSAALHCLVVQGKKGEDILGPLRRVLTHIDHSLSRQNC PFLAGDTESLAD  
IVLW GALYPLLQDPAYLPEELGALQSWFQTLSTQEPQRAAETVLKQQGV LALRLYLQKQPQPPPPPEGRTVSNEL  
EEEELATLSEEDIVTAVA AWEKGLLESLPPLKLQHPVLPVPGERNVLITSAGPYVNNVPHLGNII GCVLSADVFARY  
CRLRQWNTLYLCGTDEYGTATETKAMEEGLTPREICDKYHAIHAD IYRWFGISFDTFGRTTTPQOTKITQDIFQRL  
TRGFVLRDTVEQLRCERCARFLADRFVEGVCPFCGYEEARGDQCDCRGKLINAIELKKPQCKICRSCPVVRSSQHLF  
LDLPKLEKRLLEDWLGKTVPGSDWTPNARFIIRSWLRDGLKPRCITRDLKWGTPVPLEGFEDKVFYVWF DATIGYVSI  
TANYTDQWEKWWWKNPEQVDLYQFMAKDNVPFHGLVFP C SVLGAEDNYTLVKHIIATEYLN YEDGKFSKSRGIGVFGD  
MAKDTGIPADIWRFYLLYIRPEGQDSAFSWTDLLIKNNSELLNNGNF INRAGMFVSKFFGGCVPEMALT PDDRRLV  
AHVSWELQHYHQ LLEKVRIRDALRSILTISRHGNQYIQVNEPWKRIKGGEMDRQRAGTVTGM AVNMAALLSVMLQPY  
MPTVSSTIQTQLQLPPAACRILATSFICTLPAGHRIGTVSPLFQKLENDQIENLRQRF GGGQAKGSPKPAAVEAVTA  
AGSQHIQTLTDEVT KQGNVVRELKAQKADKNQVA AEVAKLLDLKKQLALAE GKPIETPKGKKKKEGRGSLITCGDVE  
ENPGPMVSKGEEDNMAI I KEFMRFKVHMEGSVNGHEFEIEGEGEGRPYEGTQTAKLKVTKGGPLPFAWDILSPQFMY  
GSKAYVKHPADI PDYLKLSFPEGFKWERVMNFEDGGVTVTQDSSLQDGEFIYKVKLRGTNFP SDGPVMQKKTMGWE  
ASSERMYPEDGALKGEIKQRLKLDGGHYDAEVKTTYKAKKPVQLPGAYNVNIKLDITSHNEDY TIVEQYERAEGRH  
STGGMDELYKEQKLI SEEDL-

**Figure S15. Western blot for detection of L274G*Mm*MetRS and Anl labeled proteins.** Metabolic incorporation of Anl by pMaRS- and pMaRSC-transfected CHO cells. The in-gel fluorescence image on top shows TAMRA labeling, which indicates Anl incorporation. Western blot at the bottom using anti-Myc antibody shows the detection of mCherry at approximately 25 kDa.

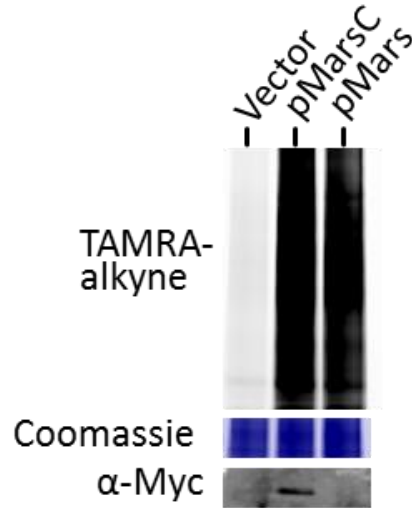

Western blot using a Myc-tag-Alexa Fluor 488 conjugate monoclonal antibody was used to probe for mCherry in lysates of CHO cells transfected with pMaRSC and pMaRS vectors. The pMaRSC lane shows a protein band at approximately 25 kDa corresponding to mCherry and no other bands at higher molecular weights indicating that mCherry is not fused to L274G*Mm*MetRS. The pMaRS vector lacks the mCherry sequence and as anticipated we do not observe a protein band corresponding to mCherry in the cell lysates.

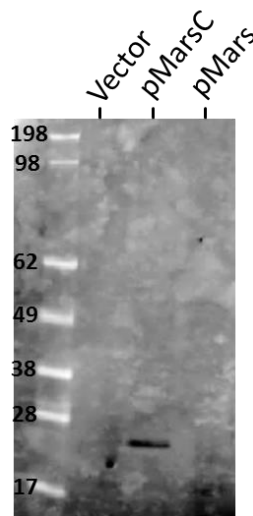



**Figure S16. Identification of AnI-labeled proteins by tandem mass spectrometry and annotation in terms of cellular components using STRAP software.** BONCAT was used to identify proteins made in CHO cells that constitutively express the L274G*MmMetRS* under control of the CMV promoter. Cells were labeled in media containing either 2 mM AnI or with 2 mM Met. The Met samples were used to account for proteins that bind non-specifically to the resin during enrichment. Two biological replicates were performed for each amino acid with independent mass spectrometric runs for each. The charts below show the distributions of proteins identified in the AnI-labeled samples.

Replicate 1 (884 proteins)

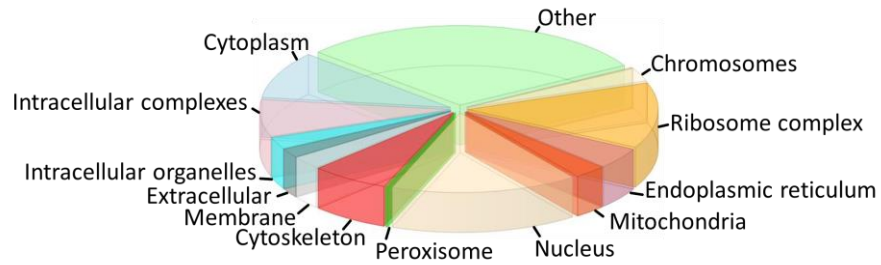

Replicate 2 (959 proteins)

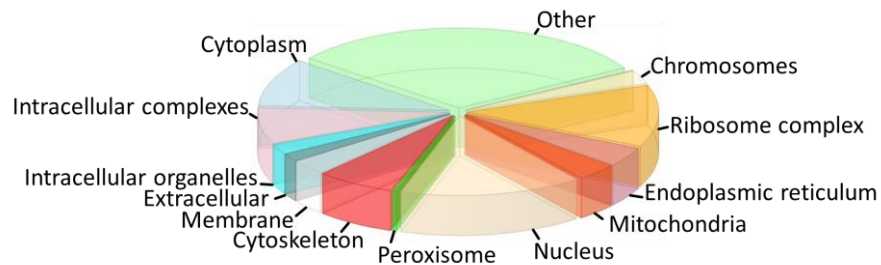

The proteins identified in either of the Met samples were removed from the list of proteins identified in either of the AnI samples. The result of this analysis is shown in the chart below and included in the main text in Figure 3d.

Proteins found only in AnI-labeled samples (786 proteins)

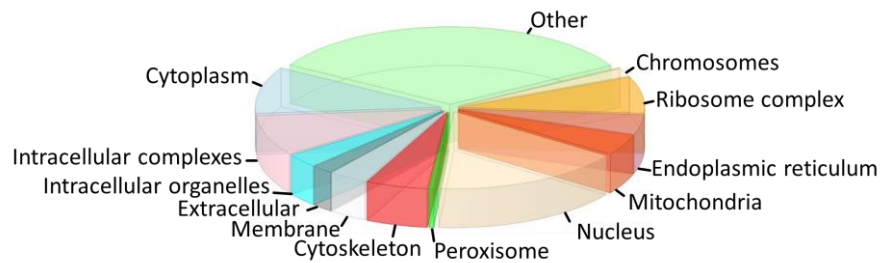

**Figure S17. Assessment of enrichment and reproducibility in BONCAT analysis.** The extent to which BONCAT allows enrichment of newly synthesized proteins was assessed by comparing the numbers of proteins found in Anl- and Met-treated samples, and by comparing spectral counts. We identified a total of 847 proteins that were found in both Anl replicates, of which 724 were not present in the Met controls. There were 129 proteins that were in both Met samples (a). Combining the total proteins identified in either of the Anl samples resulted in 996 proteins, 786 of which were not present in either of the Met samples (b). Comparison of the proteins identified in the two Anl replicates (c) and the two Met replicates (d) shows low sample-to-sample variability for the Anl replicates. Reproducibility of quantified protein levels across biological replicates was determined using MaxQuant's label-free quantification (LFQ) value. LFQ serves as a normalized measure of relative protein abundance. These results are shown as dot plots of LFQ levels between Anl replicates (e) and Met replicates (f). On average, we observed 19-fold more spectral counts for Anl samples than for Met samples (g). The numbers in panel g represent the spectral counts acquired in individual MS runs.

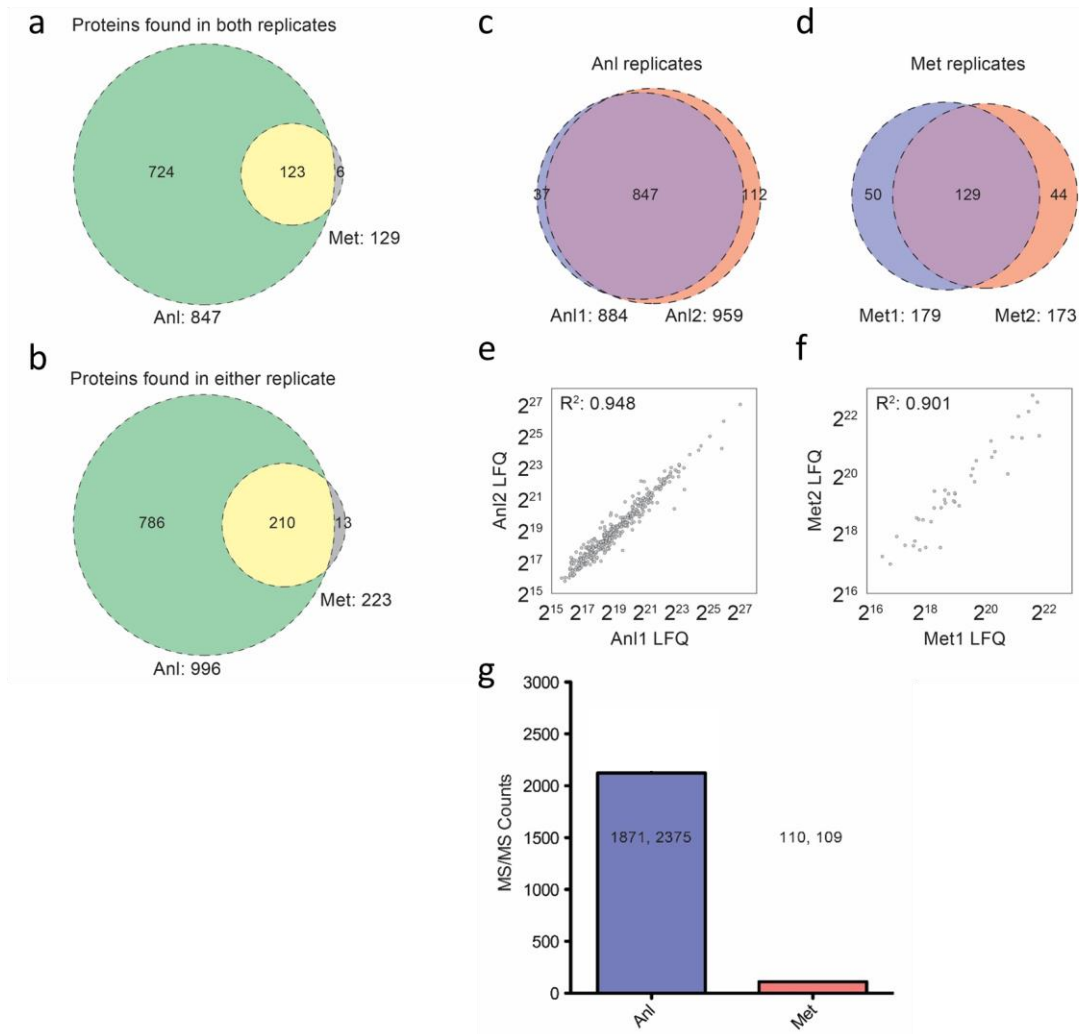

**Figure S18. Incorporation of AnI at terminal and internal Met sites in HeLa cells.** According to UniProt (<http://www.uniprot.org/>), there are 711,731 internal and 79,802 N-terminal Met residues in the human proteome; internal Met sites constitute 90% of the total. Mass spectrometric analysis of proteins made in HeLa cells expressing the L274G*MmMetRS* (see table S2 for protein list) identified 161 sites of AnI incorporation; 150 (93%) at internal Met positions.

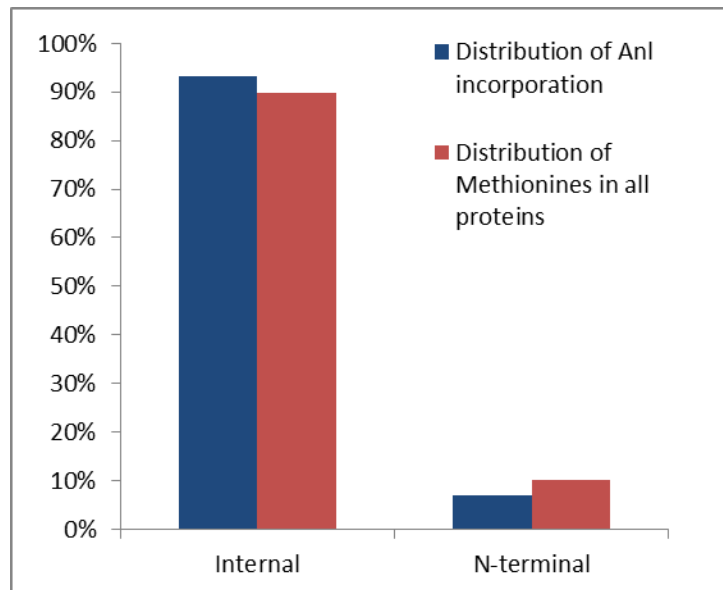

## SUPPLEMENTARY REFERENCES

- (1) Link, A. J.; Vink, M. K.; Tirrell, D. A. *Nat. Protoc.* **2007**, *2*, 1884.
- (2) Hong, V.; Presolski, S. I.; Ma, C.; Finn, M. G. *Angew. Chem. Int. Ed.* **2009**, *48*, 9879.
- (3) Mahdavi, A.; Szychowski, J.; Ngo, J. T.; Sweredoski, M. J.; Graham, R. L.; Hess, S.; Schneewind, O.; Mazmanian, S. K.; Tirrell, D. A. *Proc. Natl. Acad. Sci. U.S.A.* **2014**, *111*, 433.
- (4) Szychowski, J.; Mahdavi, A.; Hodas, J. J.; Bagert, J. D.; Ngo, J. T.; Landgraf, P.; Dieterich, D. C.; Schuman, E. M.; Tirrell, D. A. *J. Am. Chem. Soc.* **2010**, *132*, 18351.
- (5) Wisniewski, J. R.; Zougman, A.; Nagaraj, N.; Mann, M. *Nat. Methods* **2009**, *6*, 359.
- (6) Kalli, A.; Smith, G. T.; Sweredoski, M. J.; Hess, S. *J. Proteome Res.* **2013**, *12*, 3071.
- (7) Cox, J.; Mann, M. *Nat. Biotechnol.* **2008**, *26*, 1367.
- (8) Bhatia, V. N.; Perlman, D. H.; Costello, C. E.; McComb, M. E. *Anal. Chem.* **2009**, *81*, 9819.
- (9) Fersht, A. *Structure and Mechanism in Protein Science : A Guide to Enzyme Catalysis and Protein Folding*; W.H. Freeman: New York, 1999.
